# Supplementary material for: A user-friendly earth system model of low complexity: the ESCIMO system dynamics model of global warming towards 2100
Source: Copernicus journal article supplement (doi:10.5194/esd-7-831-2016), 2016-11-02
Supplement: Supplementary file 1 [file ExoDataESCIMO.xlsx]

## Sheet: toV
Exogenous data for ESCIMO																																									0
Original:	'RCPdata.xlsx', 'sunfit' , 'a', 'c3'	RCPdata.xlsx', 'toV' , 'a', 'ar3'	RCPdata.xlsx', 'toV' , 'a', 'as3'	RCPdata.xlsx', 'toV' , 'a', 'at3'	RCPdata.xlsx', 'toV' , 'a', 'au3'	RCPdata.xlsx', 'toV' , 'a', 'ai3'	RCPdata.xlsx', 'toV' , 'a', 'ak3'	RCPdata.xlsx', 'toV' , 'a', 'q3'	RCPdata.xlsx', 'toV' , 'a', 'r3'	RCPdata.xlsx', 'toV' , 'a', 's3'	RCPdata.xlsx', 'toV' , 'a', 't3'	RCPdata.xlsx', 'toV' , 'a', 'm3'	RCPdata.xlsx', 'toV' , 'a', 'i3'	RCPdata.xlsx', 'toV' , 'a', 'j3'	RCPdata.xlsx', 'toV' , 'a', 'k3'	RCPdata.xlsx', 'toV' , 'a', 'l3'	RCPdata.xlsx', 'toV' , 'a', 'b3'	RCPdata.xlsx', 'toV' , 'a', 'c3'	RCPdata.xlsx', 'toV' , 'a', 'd3'	RCPdata.xlsx', 'toV' , 'a', 'e3'	RCPdata.xlsx', 'toV' , 'a', 'f3'	RCPdata.xlsx', 'toV' , 'a', 'v3'	RCPdata.xlsx', 'toV' , 'a', 'w3'	RCPdata.xlsx', 'toV' , 'a', 'x3'	RCPdata.xlsx', 'toV' , 'a', 'y3'	RCPdata.xlsx', 'RCP3_conc' , 'a', 'f125'	RCPdata.xlsx', 'RCP45_conc' , 'a', 'f125'	RCPdata.xlsx', 'RCP6_conc' , 'a', 'f125'	RCPdata.xlsx', 'RCP85_conc' , 'a', 'f125'	RCPdata.xlsx', 'JR_emi' , 'a', 'q124'	RCPdata.xlsx', 'JR_emi' , 'a', 'u124'	Church, J. A. and N.J. White (2011), "Sea-level rise from the late 19th to the early 21st Century", Surveys in Geophysics, 32(4-5), 585-602, doi:10.1007/s10712-011-9119-1.		RCPdata.xlsx', 'JR_emi' , 'a', 'ac124'	RCPdata.xlsx', 'JR_emi' , 'a', 'ah124'				RCPdata.xlsx', 'toV' , 'a', 'm3'		RCPdata.xlsx', 'toV' , 'a', 'm3'
		Aerosol anthro	Aerosol volcanic	Aerosol anthro	Aerosol anthro	CO2 ppm from tab RCP3_conc	Sea level rise mm	CO2 concentrations ppm				CH4 emissions MtCH4/yr	CH4 emissions MtCH4/yr				CO2 emissions GtC/yr		RCPs less land use change			CH4 concentrations ppb				N2O ppb						Sea level rise mm				CO2 GtC/yr		CO2 GtC/yr	CH4 MtCH4/yr		CH4 emissions MtCH4/yr
Year	Solar forcing W/m2 rel to 1850	W/m2	W/m2	Tg/yr	Gt/yr			RCP3	RCP45	RCP6	RCP85	JR	RCP3	RCP45	RCP6	RCP85	RCP3	RCP45	RCP6	RCP85	JR ML	RCP3	RCP45	RCP6	RCP85	RCP3	RCP45	RCP6	RCP85	JR 2%	JR 1% renewable			JR CO2 shape 'twice as fast' 2005=1	JR CO2 shape 'twice as fast' 2005=2	JR ML plus twice as fast		JR ML plus ccs	JR ML plus twice as fast		JR reaching 0 in 2100
1850	0	0	-0.0404396	0	0	284.725	0	284.725	284.725	284.725	284.725	56.0408	56.0408	56.0408	56.0408	56.0408	0.054	0.054	0.054	0.054	0.054	790.979	790.979	790.979	790.979	275.425	275.425	275.425	275.425	0.054	0.054			#REF!	#REF!	0.054		0.054	56.0408		56.0408
1851	-0.0118038	-0.000709793	-0.0394115	0.534746	0.000534746	284.875	0	284.875	284.875	284.875	284.875	56.4613	56.4613	56.4613	56.4613	56.4613	0.054	0.054	0.054	0.054	0.054	792.25	792.25	792.25	792.25	275.5	275.5	275.5	275.5	0.054	0.054			#REF!	#REF!	0.054		0.054	56.4613		56.4613
1852	-0.0233844	-0.00154743	-0.0236469	1.16581	0.00116581	285	0	285	285	285	285	56.8819	56.8819	56.8819	56.8819	56.8819	0.057	0.057	0.057	0.057	0.057	793.75	793.75	793.75	793.75	275.6	275.6	275.6	275.6	0.057	0.057			#REF!	#REF!	0.057		0.057	56.8819		56.8819
1853	-0.0418862	-0.00251547	-0.00891042	1.89512	0.00189512	285.125	0	285.125	285.125	285.125	285.125	57.3024	57.3024	57.3024	57.3024	57.3024	0.059	0.059	0.059	0.059	0.059	795.25	795.25	795.25	795.25	275.7	275.7	275.7	275.7	0.059	0.059			#REF!	#REF!	0.059		0.059	57.3024		57.3024
1854	-0.0609306	-0.00439316	-0.00068542	3.30973	0.00330973	285.275	0	285.275	285.275	285.275	285.275	57.723	57.723	57.723	57.723	57.723	0.069	0.069	0.069	0.069	0.069	796.75	796.75	796.75	796.75	275.8	275.8	275.8	275.8	0.069	0.069			#REF!	#REF!	0.069		0.069	57.723		57.723
1855	-0.0730975	-0.00621846	-0.131257	4.68488	0.00468488	285.425	0	285.425	285.425	285.425	285.425	58.1436	58.1436	58.1436	58.1436	58.1436	0.071	0.071	0.071	0.071	0.071	798	798	798	798	275.9	275.9	275.9	275.9	0.071	0.071			#REF!	#REF!	0.071		0.071	58.1436		58.1436
1856	-0.0715356	-0.0069827	-0.589116	5.26064	0.00526064	285.575	0	285.575	285.575	285.575	285.575	58.5641	58.5641	58.5641	58.5641	58.5641	0.076	0.076	0.076	0.076	0.076	799.25	799.25	799.25	799.25	276	276	276	276	0.076	0.076			#REF!	#REF!	0.076		0.076	58.5641		58.5641
1857	-0.0534231	-0.0075837	-0.84272	5.71343	0.00571343	285.725	0	285.725	285.725	285.725	285.725	58.9847	58.9847	58.9847	58.9847	58.9847	0.077	0.077	0.077	0.077	0.077	800.75	800.75	800.75	800.75	276.1	276.1	276.1	276.1	0.077	0.077			#REF!	#REF!	0.077		0.077	58.9847		58.9847
1858	-0.0222294	-0.0073678	-0.53017	5.55078	0.00555078	285.9	0	285.9	285.9	285.9	285.9	59.4052	59.4052	59.4052	59.4052	59.4052	0.078	0.078	0.078	0.078	0.078	802.25	802.25	802.25	802.25	276.2	276.2	276.2	276.2	0.078	0.078			#REF!	#REF!	0.078		0.078	59.4052		59.4052
1859	0.00818125	-0.0079206	-0.204254	5.96725	0.00596725	286.075	0	286.075	286.075	286.075	286.075	59.8258	59.8258	59.8258	59.8258	59.8258	0.083	0.083	0.083	0.083	0.083	803.75	803.75	803.75	803.75	276.3	276.3	276.3	276.3	0.083	0.083			#REF!	#REF!	0.083		0.083	59.8258		59.8258
1860	0.0187338	-0.0103704	-0.0819073	7.81292	0.00781292	286.225	0	286.225	286.225	286.225	286.225	60.2464	60.2464	60.2464	60.2464	60.2464	0.091	0.091	0.091	0.091	0.091	805.25	805.25	805.25	805.25	276.4	276.4	276.4	276.4	0.091	0.091			#REF!	#REF!	0.091		0.091	60.2464		60.2464
1861	0.00548187	-0.0134383	-0.092874	10.1242	0.0101242	286.375	0	286.375	286.375	286.375	286.375	59.6145	59.6145	59.6145	59.6145	59.6145	0.095	0.095	0.095	0.095	0.095	806.75	806.75	806.75	806.75	276.5	276.5	276.5	276.5	0.095	0.095			#REF!	#REF!	0.095		0.095	59.6145		59.6145
1862	-0.0161219	-0.0139026	-0.17718	10.474	0.010474	286.5	0	286.5	286.5	286.5	286.5	58.9826	58.9826	58.9826	58.9826	58.9826	0.097	0.097	0.097	0.097	0.097	808.25	808.25	808.25	808.25	276.6	276.6	276.6	276.6	0.097	0.097			#REF!	#REF!	0.097		0.097	58.9826		58.9826
1863	-0.0327469	-0.0139693	-0.164843	10.5242	0.0105242	286.625	0	286.625	286.625	286.625	286.625	58.3507	58.3507	58.3507	58.3507	58.3507	0.104	0.104	0.104	0.104	0.104	809.75	809.75	809.75	809.75	276.7	276.7	276.7	276.7	0.104	0.104			#REF!	#REF!	0.104		0.104	58.3507		58.3507
1864	-0.0458194	-0.0154378	-0.0815646	11.6306	0.0116306	286.775	0	286.775	286.775	286.775	286.775	57.7188	57.7188	57.7188	57.7188	57.7188	0.112	0.112	0.112	0.112	0.112	811.25	811.25	811.25	811.25	276.8	276.8	276.8	276.8	0.112	0.112			#REF!	#REF!	0.112		0.112	57.7188		57.7188
1865	-0.0592463	-0.0170841	-0.0339281	12.8709	0.0128709	286.9	0	286.9	286.9	286.9	286.9	57.0869	57.0869	57.0869	57.0869	57.0869	0.119	0.119	0.119	0.119	0.119	813	813	813	813	276.9	276.9	276.9	276.9	0.119	0.119			#REF!	#REF!	0.119		0.119	57.0869		57.0869
1866	-0.0710544	-0.0187769	-0.0133656	14.1462	0.0141462	287	0	287	287	287	287	56.455	56.455	56.455	56.455	56.455	0.122	0.122	0.122	0.122	0.122	814.75	814.75	814.75	814.75	277	277	277	277	0.122	0.122			#REF!	#REF!	0.122		0.122	56.455		56.455
1867	-0.0714175	-0.0206226	-0.00342708	15.5367	0.0155367	287.1	0	287.1	287.1	287.1	287.1	55.8231	55.8231	55.8231	55.8231	55.8231	0.130223	0.130223	0.130223	0.130223	0.130223	816.25	816.25	816.25	816.25	277.1	277.1	277.1	277.1	0.13	0.13			#REF!	#REF!	0.130223		0.130223	55.8231		55.8231
1868	-0.0493894	-0.0217817	-0.00137083	16.41	0.01641	287.225	0	287.225	287.225	287.225	287.225	55.1912	55.1912	55.1912	55.1912	55.1912	0.135252	0.135252	0.135252	0.135252	0.135252	817.75	817.75	817.75	817.75	277.2	277.2	277.2	277.2	0.135	0.135			#REF!	#REF!	0.135252		0.135252	55.1912		55.1912
1869	-0.0112831	-0.0221039	-0.00959583	16.6527	0.0166527	287.375	0	287.375	287.375	287.375	287.375	54.5593	54.5593	54.5593	54.5593	54.5593	0.142281	0.142281	0.142281	0.142281	0.142281	819.25	819.25	819.25	819.25	277.3	277.3	277.3	277.3	0.142	0.142			#REF!	#REF!	0.142281		0.142281	54.5593		54.5593
1870	0.0173119	-0.0224881	-0.0137083	16.9421	0.0169421	287.525	3.6175	287.525	287.525	287.525	287.525	53.9274	53.9274	53.9274	53.9274	53.9274	0.147311	0.147311	0.147311	0.147311	0.147311	821	821	821	821	277.375	277.375	277.375	277.375	0.147	0.147	-14.3733		#REF!	#REF!	0.147311		0.147311	53.9274		53.9274
1871	0.0204531	-0.0259685	-0.0130229	19.5642	0.0195642	287.7	0.605833	287.7	287.7	287.7	287.7	56.6839	56.6839	56.6839	56.6839	56.6839	0.15634	0.15634	0.15634	0.15634	0.15634	822.75	822.75	822.75	822.75	277.425	277.425	277.425	277.425	0.156	0.156	-17.385		#REF!	#REF!	0.15634		0.15634	56.6839		56.6839
1872	0.00494375	-0.0319898	-0.0253604	24.1006	0.0241006	287.9	9.02417	287.9	287.9	287.9	287.9	59.4403	59.4403	59.4403	59.4403	59.4403	0.173369	0.173369	0.173369	0.173369	0.173369	824.25	824.25	824.25	824.25	277.5	277.5	277.5	277.5	0.173	0.173	-8.96667		#REF!	#REF!	0.173369		0.173369	59.4403		59.4403
1873	-0.0203044	-0.0361653	-0.0390688	27.2463	0.0272463	288.125	5.27917	288.125	288.125	288.125	288.125	62.1968	62.1968	62.1968	62.1968	62.1968	0.184398	0.184398	0.184398	0.184398	0.184398	825.75	825.75	825.75	825.75	277.6	277.6	277.6	277.6	0.184	0.184	-12.7117		#REF!	#REF!	0.184398		0.184398	62.1968		62.1968
1874	-0.0468387	-0.0359661	-0.0311865	27.0962	0.0270962	288.4	3.64	288.4	288.4	288.4	288.4	64.9533	64.9533	64.9533	64.9533	64.9533	0.174428	0.174428	0.174428	0.174428	0.174428	827.25	827.25	827.25	827.25	277.7	277.7	277.7	277.7	0.174	0.174	-14.3508		#REF!	#REF!	0.174428		0.174428	64.9533		64.9533
1875	-0.0676637	-0.0352114	-0.0383833	26.5276	0.0265276	288.7	0	288.7	288.7	288.7	288.7	67.7097	67.7097	67.7097	67.7097	67.7097	0.188457	0.188457	0.188457	0.188457	0.188457	829	829	829	829	277.775	277.775	277.775	277.775	0.188	0.188	-17.9908		#REF!	#REF!	0.188457		0.188457	67.7097		67.7097
1876	-0.0785488	-0.0361833	-0.0795083	27.2599	0.0272599	289.025	12.4417	289.025	289.025	289.025	289.025	70.4662	70.4662	70.4662	70.4662	70.4662	0.191486	0.191486	0.191486	0.191486	0.191486	830.75	830.75	830.75	830.75	277.825	277.825	277.825	277.825	0.191	0.191	-5.54917		#REF!	#REF!	0.191486		0.191486	70.4662		70.4662
1877	-0.0819744	-0.0354334	-0.0839635	26.6949	0.0266949	289.4	22.585	289.4	289.4	289.4	289.4	73.2226	73.2226	73.2226	73.2226	73.2226	0.194515	0.194515	0.194515	0.194515	0.194515	832.25	832.25	832.25	832.25	277.9	277.9	277.9	277.9	0.194	0.194	4.59417		#REF!	#REF!	0.194515		0.194515	73.2226		73.2226
1878	-0.0834925	-0.0340249	-0.0520917	25.6337	0.0256337	289.8	24.04	289.8	289.8	289.8	289.8	75.9791	75.9791	75.9791	75.9791	75.9791	0.196	0.196	0.196	0.196	0.196	833.75	833.75	833.75	833.75	278	278	278	278	0.196	0.196	6.04917		#REF!	#REF!	0.196		0.196	75.9791		75.9791
1879	-0.07637	-0.0351697	-0.030501	26.4962	0.0264962	290.225	11.9533	290.225	290.225	290.225	290.225	78.7356	78.7356	78.7356	78.7356	78.7356	0.21	0.21	0.21	0.21	0.21	835.25	835.25	835.25	835.25	278.1	278.1	278.1	278.1	0.21	0.21	-6.0375		#REF!	#REF!	0.21		0.21	78.7356		78.7356
1880	-0.0562406	-0.0407477	-0.0167927	30.6986	0.0306986	290.7	12.8058	290.7	290.7	290.7	290.7	81.492	81.492	81.492	81.492	81.492	0.236	0.236	0.236	0.236	0.236	837	837	837	837	278.2	278.2	278.2	278.2	0.236	0.236	-5.185		#REF!	#REF!	0.236		0.236	81.492		81.492
1881	-0.0361769	-0.0436657	-0.00959583	32.897	0.032897	291.2	16.5267	291.2	291.2	291.2	291.2	84.3595	84.3595	84.3595	84.3595	84.3595	0.243	0.243	0.243	0.243	0.243	839	839	839	839	278.3	278.3	278.3	278.3	0.243	0.243	-1.46417		#REF!	#REF!	0.243		0.243	84.3595		84.3595
1882	-0.0257644	-0.0437493	-0.121319	32.96	0.03296	291.675	3.95583	291.675	291.675	291.675	291.675	87.2269	87.2269	87.2269	87.2269	87.2269	0.256	0.256	0.256	0.256	0.256	841	841	841	841	278.4	278.4	278.4	278.4	0.256	0.256	-14.035		#REF!	#REF!	0.256		0.256	87.2269		87.2269
1883	-0.0249156	-0.0458478	-1.03498	34.5409	0.0345409	292.125	5.28417	292.125	292.125	292.125	292.125	90.0943	90.0943	90.0943	90.0943	90.0943	0.272	0.272	0.272	0.272	0.272	843	843	843	843	278.5	278.5	278.5	278.5	0.272	0.272	-12.7067		#REF!	#REF!	0.272		0.272	90.0943		90.0943
1884	-0.0362338	-0.0460634	-1.76975	34.7034	0.0347034	292.575	16.2067	292.575	292.575	292.575	292.575	92.9618	92.9618	92.9618	92.9618	92.9618	0.275	0.275	0.275	0.275	0.275	844.75	844.75	844.75	844.75	278.6	278.6	278.6	278.6	0.275	0.275	-1.78417		#REF!	#REF!	0.275		0.275	92.9618		92.9618
1885	-0.0573475	-0.0441062	-1.17652	33.2289	0.0332289	292.975	13.7575	292.975	292.975	292.975	292.975	95.8292	95.8292	95.8292	95.8292	95.8292	0.277	0.277	0.277	0.277	0.277	846.25	846.25	846.25	846.25	278.7	278.7	278.7	278.7	0.277	0.277	-4.23333		#REF!	#REF!	0.277		0.277	95.8292		95.8292
1886	-0.0785094	-0.0427576	-0.680961	32.2129	0.0322129	293.3	19.5417	293.3	293.3	293.3	293.3	98.6966	98.6966	98.6966	98.6966	98.6966	0.281	0.281	0.281	0.281	0.281	848	848	848	848	278.8	278.8	278.8	278.8	0.281	0.281	1.55083		#REF!	#REF!	0.281		0.281	98.6966		98.6966
1887	-0.0910963	-0.0433793	-0.553817	32.6812	0.0326812	293.575	16.235	293.575	293.575	293.575	293.575	101.564	101.564	101.564	101.564	101.564	0.295	0.295	0.295	0.295	0.295	850	850	850	850	278.875	278.875	278.875	278.875	0.295	0.295	-1.75583		#REF!	#REF!	0.295		0.295	101.564		101.564
1888	-0.0973394	-0.0478618	-0.443465	36.0583	0.0360583	293.8	12.9625	293.8	293.8	293.8	293.8	104.431	104.431	104.431	104.431	104.431	0.327	0.327	0.327	0.327	0.327	852	852	852	852	278.925	278.925	278.925	278.925	0.327	0.327	-5.02833		#REF!	#REF!	0.327		0.327	104.431		104.431
1889	-0.0998594	-0.0496314	-0.50995	37.3914	0.0373914	294	18.7817	294	294	294	294	107.299	107.299	107.299	107.299	107.299	0.327	0.327	0.327	0.327	0.327	854	854	854	854	279	279	279	279	0.327	0.327	0.790833		#REF!	#REF!	0.327		0.327	107.299		107.299
1890	-0.0870756	-0.0504764	-0.564098	38.0281	0.0380281	294.175	18.5325	294.175	294.175	294.175	294.175	110.166	110.166	110.166	110.166	110.166	0.356	0.356	0.356	0.356	0.356	856	856	856	856	279.1	279.1	279.1	279.1	0.356	0.356	0.541667		#REF!	#REF!	0.356		0.356	110.166		110.166
1891	-0.0592506	-0.054476	-0.494185	41.0413	0.0410413	294.325	19.0775	294.325	294.325	294.325	294.325	111.524	111.524	111.524	111.524	111.524	0.372	0.372	0.372	0.372	0.372	858.25	858.25	858.25	858.25	279.2	279.2	279.2	279.2	0.372	0.372	1.08667		#REF!	#REF!	0.372		0.372	111.524		111.524
1892	-0.0334556	-0.0565515	-0.32009	42.6049	0.0426049	294.475	22.6758	294.475	294.475	294.475	294.475	112.881	112.881	112.881	112.881	112.881	0.374	0.374	0.374	0.374	0.374	860.75	860.75	860.75	860.75	279.3	279.3	279.3	279.3	0.374	0.374	4.685		#REF!	#REF!	0.374		0.374	112.881		112.881
1893	-0.012635	-0.0573446	-0.172382	43.2024	0.0432024	294.6	28.14	294.6	294.6	294.6	294.6	114.238	114.238	114.238	114.238	114.238	0.37	0.37	0.37	0.37	0.37	863	863	863	863	279.375	279.375	279.375	279.375	0.37	0.37	10.1492		#REF!	#REF!	0.37		0.37	114.238		114.238
1894	-0.00321562	-0.0576046	-0.0630583	43.3984	0.0433984	294.7	20.6633	294.7	294.7	294.7	294.7	115.595	115.595	115.595	115.595	115.595	0.383	0.383	0.383	0.383	0.383	865	865	865	865	279.425	279.425	279.425	279.425	0.383	0.383	2.6725		#REF!	#REF!	0.383		0.383	115.595		115.595
1895	-0.0171369	-0.0582626	-0.0705979	43.894	0.043894	294.8	32.4792	294.8	294.8	294.8	294.8	116.953	116.953	116.953	116.953	116.953	0.406	0.406	0.406	0.406	0.406	867.25	867.25	867.25	867.25	279.475	279.475	279.475	279.475	0.406	0.406	14.4883		#REF!	#REF!	0.406		0.406	116.953		116.953
1896	-0.0444194	-0.0582398	-0.215906	43.8769	0.0438769	294.9	26.875	294.9	294.9	294.9	294.9	118.31	118.31	118.31	118.31	118.31	0.419	0.419	0.419	0.419	0.419	869.75	869.75	869.75	869.75	279.525	279.525	279.525	279.525	0.419	0.419	8.88417		#REF!	#REF!	0.419		0.419	118.31		118.31
1897	-0.0660581	-0.0568865	-0.297128	42.8573	0.0428573	295.025	30.6525	295.025	295.025	295.025	295.025	119.667	119.667	119.667	119.667	119.667	0.44	0.44	0.44	0.44	0.44	872	872	872	872	279.6	279.6	279.6	279.6	0.44	0.44	12.6617		#REF!	#REF!	0.44		0.44	119.667		119.667
1898	-0.0766763	-0.0554568	-0.194658	41.7802	0.0417802	295.225	35.1975	295.225	295.225	295.225	295.225	121.025	121.025	121.025	121.025	121.025	0.465	0.465	0.465	0.465	0.465	874.25	874.25	874.25	874.25	279.675	279.675	279.675	279.675	0.465	0.465	17.2067		#REF!	#REF!	0.465		0.465	121.025		121.025
1899	-0.083545	-0.0554097	-0.0819073	41.7447	0.0417447	295.5	39.6883	295.5	295.5	295.5	295.5	122.382	122.382	122.382	122.382	122.382	0.507	0.507	0.507	0.507	0.507	876.75	876.75	876.75	876.75	279.725	279.725	279.725	279.725	0.507	0.507	21.6975		#REF!	#REF!	0.507		0.507	122.382		122.382
1900	-0.0919187	-0.0563049	-0.030501	42.4192	0.0424192	295.8	31.1883	295.8	295.8	295.8	295.8	123.739	123.739	123.739	123.739	123.739	0.534	0.534	0.534	0.534	0.534	879.5	879.5	879.5	879.5	279.8	279.8	279.8	279.8	0.534	0.534	13.1975		#REF!	#REF!	0.534		0.534	123.739		123.739
1901	-0.0997281	-0.0552189	-0.0407823	41.601	0.041601	296.125	27.525	296.125	296.125	296.125	296.125	124.841	124.841	124.841	124.841	124.841	0.552	0.552	0.552	0.552	0.552	883	883	883	883	279.9	279.9	279.9	279.9	0.552	0.552	9.53417		#REF!	#REF!	0.552		0.552	124.841		124.841
1902	-0.093205	-0.0553565	-0.489387	41.7046	0.0417046	296.475	29.6583	296.475	296.475	296.475	296.475	125.944	125.944	125.944	125.944	125.944	0.566	0.566	0.566	0.566	0.566	887	887	887	887	280	280	280	280	0.566	0.566	11.6675		#REF!	#REF!	0.566		0.566	125.944		125.944
1903	-0.0626281	-0.0584858	-0.883502	44.0622	0.0440622	296.825	36.9325	296.825	296.825	296.825	296.825	127.046	127.046	127.046	127.046	127.046	0.617	0.617	0.617	0.617	0.617	891.25	891.25	891.25	891.25	280.1	280.1	280.1	280.1	0.617	0.617	18.9417		#REF!	#REF!	0.617		0.617	127.046		127.046
1904	-0.0380669	-0.060531	-0.588773	45.603	0.045603	297.2	34.2267	297.2	297.2	297.2	297.2	128.149	128.149	128.149	128.149	128.149	0.624	0.624	0.624	0.624	0.624	895.75	895.75	895.75	895.75	280.2	280.2	280.2	280.2	0.624	0.624	16.2358		#REF!	#REF!	0.624		0.624	128.149		128.149
1905	-0.0341863	-0.0623063	-0.2303	46.9405	0.0469405	297.625	30.1417	297.625	297.625	297.625	297.625	129.251	129.251	129.251	129.251	129.251	0.663	0.663	0.663	0.663	0.663	900.25	900.25	900.25	900.25	280.3	280.3	280.3	280.3	0.663	0.663	12.1508		#REF!	#REF!	0.663		0.663	129.251		129.251
1906	-0.0303319	-0.0640325	-0.132285	48.241	0.048241	298.075	36.3958	298.075	298.075	298.075	298.075	130.354	130.354	130.354	130.354	130.354	0.707	0.707	0.707	0.707	0.707	904.75	904.75	904.75	904.75	280.4	280.4	280.4	280.4	0.707	0.707	18.405		#REF!	#REF!	0.707		0.707	130.354		130.354
1907	-0.0290238	-0.0662048	-0.156275	49.8776	0.0498776	298.5	34.0342	298.5	298.5	298.5	298.5	131.456	131.456	131.456	131.456	131.456	0.784	0.784	0.784	0.784	0.784	909.25	909.25	909.25	909.25	280.525	280.525	280.525	280.525	0.784	0.784	16.0433		#REF!	#REF!	0.784		0.784	131.456		131.456
1908	-0.0332325	-0.0659557	-0.144623	49.6899	0.0496899	298.9	31.42	298.9	298.9	298.9	298.9	132.559	132.559	132.559	132.559	132.559	0.75	0.75	0.75	0.75	0.75	914	914	914	914	280.675	280.675	280.675	280.675	0.75	0.75	13.4292		#REF!	#REF!	0.75		0.75	132.559		132.559
1909	-0.0458937	-0.0649904	-0.0784802	48.9626	0.0489626	299.3	35.6075	299.3	299.3	299.3	299.3	133.661	133.661	133.661	133.661	133.661	0.785	0.785	0.785	0.785	0.785	919	919	919	919	280.825	280.825	280.825	280.825	0.785	0.785	17.6167		#REF!	#REF!	0.785		0.785	133.661		133.661
1910	-0.0660537	-0.0669429	-0.043524	50.4337	0.0504337	299.7	33.33	299.7	299.7	299.7	299.7	134.764	134.764	134.764	134.764	134.764	0.819	0.819	0.819	0.819	0.819	923.75	923.75	923.75	923.75	280.975	280.975	280.975	280.975	0.819	0.819	15.3392		#REF!	#REF!	0.819		0.819	134.764		134.764
1911	-0.0812262	-0.0683355	-0.0373552	51.4828	0.0514828	300.075	41.4483	300.075	300.075	300.075	300.075	135.969	135.969	135.969	135.969	135.969	0.836	0.836	0.836	0.836	0.836	928.25	928.25	928.25	928.25	281.125	281.125	281.125	281.125	0.836	0.836	23.4575		#REF!	#REF!	0.836		0.836	135.969		135.969
1912	-0.0882131	-0.0693144	-0.281021	52.2203	0.0522203	300.425	38.2642	300.425	300.425	300.425	300.425	137.175	137.175	137.175	137.175	137.175	0.879	0.879	0.879	0.879	0.879	933	933	933	933	281.3	281.3	281.3	281.3	0.879	0.879	20.2733		#REF!	#REF!	0.879		0.879	137.175		137.175
1913	-0.0858681	-0.0713812	-0.388974	53.7774	0.0537774	300.775	39.5075	300.775	300.775	300.775	300.775	138.381	138.381	138.381	138.381	138.381	0.943	0.943	0.943	0.943	0.943	938.25	938.25	938.25	938.25	281.475	281.475	281.475	281.475	0.943	0.943	21.5167		#REF!	#REF!	0.943		0.943	138.381		138.381
1914	-0.0659663	-0.0726495	-0.176838	54.7329	0.0547329	301.1	47.7033	301.1	301.1	301.1	301.1	139.587	139.587	139.587	139.587	139.587	0.85	0.85	0.85	0.85	0.85	943.75	943.75	943.75	943.75	281.625	281.625	281.625	281.625	0.85	0.85	29.7125		#REF!	#REF!	0.85		0.85	139.587		139.587
1915	-0.0271994	-0.0736714	-0.0729969	55.5028	0.0555028	301.4	54.135	301.4	301.4	301.4	301.4	140.793	140.793	140.793	140.793	140.793	0.838	0.838	0.838	0.838	0.838	949.25	949.25	949.25	949.25	281.8	281.8	281.8	281.8	0.838	0.838	36.1442		#REF!	#REF!	0.838		0.838	140.793		140.793
1916	0.0110206	-0.0765837	-0.0448948	57.6968	0.0576968	301.725	45.3967	301.725	301.725	301.725	301.725	141.999	141.999	141.999	141.999	141.999	0.901	0.901	0.901	0.901	0.901	954.75	954.75	954.75	954.75	282	282	282	282	0.901	0.901	27.4058		#REF!	#REF!	0.901		0.901	141.999		141.999
1917	0.0315656	-0.0789163	-0.0363271	59.4542	0.0594542	302.075	41.075	302.075	302.075	302.075	302.075	143.204	143.204	143.204	143.204	143.204	0.955	0.955	0.955	0.955	0.955	960.25	960.25	960.25	960.25	282.225	282.225	282.225	282.225	0.955	0.955	23.0842		#REF!	#REF!	0.955		0.955	143.204		143.204
1918	0.0246881	-0.0806941	-0.030501	60.7936	0.0607936	302.4	44.06	302.4	302.4	302.4	302.4	144.41	144.41	144.41	144.41	144.41	0.936	0.936	0.936	0.936	0.936	966	966	966	966	282.475	282.475	282.475	282.475	0.936	0.936	26.0692		#REF!	#REF!	0.936		0.936	144.41		144.41
1919	-0.00416938	-0.0801347	-0.0376979	60.3721	0.0603721	302.7	46.1358	302.7	302.7	302.7	302.7	145.616	145.616	145.616	145.616	145.616	0.806	0.806	0.806	0.806	0.806	972	972	972	972	282.7	282.7	282.7	282.7	0.806	0.806	28.145		#REF!	#REF!	0.806		0.806	145.616		145.616
1920	-0.0330138	-0.0793913	-0.121661	59.8121	0.0598121	303.025	45.5825	303.025	303.025	303.025	303.025	146.822	146.822	146.822	146.822	146.822	0.932	0.932	0.932	0.932	0.932	977.75	977.75	977.75	977.75	282.925	282.925	282.925	282.925	0.932	0.932	27.5917		#REF!	#REF!	0.932		0.932	146.822		146.822
1921	-0.0544731	-0.0753365	-0.136741	56.7573	0.0567573	303.4	43.9433	303.4	303.4	303.4	303.4	147.862	147.862	147.862	147.862	147.862	0.803	0.803	0.803	0.803	0.803	983.25	983.25	983.25	983.25	283.175	283.175	283.175	283.175	0.803	0.803	25.9525		#REF!	#REF!	0.803		0.803	147.862		147.862
1922	-0.0680006	-0.0726782	-0.0514063	54.7545	0.0547545	303.775	42.8158	303.775	303.775	303.775	303.775	148.901	148.901	148.901	148.901	148.901	0.845	0.845	0.845	0.845	0.845	989	989	989	989	283.4	283.4	283.4	283.4	0.845	0.845	24.825		#REF!	#REF!	0.845		0.845	148.901		148.901
1923	-0.0690025	-0.0797025	-0.0301583	60.0465	0.0600465	304.125	45.9242	304.125	304.125	304.125	304.125	149.941	149.941	149.941	149.941	149.941	0.97	0.97	0.97	0.97	0.97	995	995	995	995	283.6	283.6	283.6	283.6	0.97	0.97	27.9333		#REF!	#REF!	0.97		0.97	149.941		149.941
1924	-0.0559212	-0.0840379	-0.0431813	63.3127	0.0633127	304.525	38.44	304.525	304.525	304.525	304.525	150.981	150.981	150.981	150.981	150.981	0.963	0.963	0.963	0.963	0.963	1001	1001	1001	1001	283.8	283.8	283.8	283.8	0.963	0.963	20.4492		#REF!	#REF!	0.963		0.963	150.981		150.981
1925	-0.0322569	-0.0840133	-0.0431813	63.2942	0.0632942	304.975	36.9667	304.975	304.975	304.975	304.975	152.02	152.02	152.02	152.02	152.02	0.975	0.975	0.975	0.975	0.975	1007	1007	1007	1007	284	284	284	284	0.975	0.975	18.9758		#REF!	#REF!	0.975		0.975	152.02		152.02
1926	-0.00645313	-0.084959	-0.035299	64.0066	0.0640066	305.4	42.4558	305.4	305.4	305.4	305.4	153.06	153.06	153.06	153.06	153.06	0.983	0.983	0.983	0.983	0.983	1013	1013	1013	1013	284.225	284.225	284.225	284.225	0.983	0.983	24.465		#REF!	#REF!	0.983		0.983	153.06		153.06
1927	0.00867562	-0.0862274	-0.0373552	64.9623	0.0649623	305.825	44.9383	305.825	305.825	305.825	305.825	154.1	154.1	154.1	154.1	154.1	1.062	1.062	1.062	1.062	1.062	1019	1019	1019	1019	284.45	284.45	284.45	284.45	1.062	1.062	26.9475		#REF!	#REF!	1.062		1.062	154.1		154.1
1928	0.0042	-0.088189	-0.0867052	66.44	0.06644	306.3	44.0692	306.3	306.3	306.3	306.3	155.14	155.14	155.14	155.14	155.14	1.065	1.065	1.065	1.065	1.065	1025	1025	1025	1025	284.625	284.625	284.625	284.625	1.065	1.065	26.0783		#REF!	#REF!	1.065		1.065	155.14		155.14
1929	-0.00553438	-0.091162	-0.136398	68.6799	0.0686799	306.775	41.1792	306.775	306.775	306.775	306.775	156.179	156.179	156.179	156.179	156.179	1.145	1.145	1.145	1.145	1.145	1030.75	1030.75	1030.75	1030.75	284.8	284.8	284.8	284.8	1.145	1.145	23.1883		#REF!	#REF!	1.145		1.145	156.179		156.179
1930	-0.0142275	-0.0928225	-0.110695	69.9309	0.0699309	307.225	48.7983	307.225	307.225	307.225	307.225	157.219	157.219	157.219	157.219	157.219	1.053	1.053	1.053	1.053	1.053	1036.25	1036.25	1036.25	1036.25	284.975	284.975	284.975	284.975	1.053	1.053	30.8075		#REF!	#REF!	1.053		1.053	157.219		157.219
1931	-0.0303625	-0.0911158	-0.0860198	68.6451	0.0686451	307.7	48.7575	307.7	307.7	307.7	307.7	158.345	158.345	158.345	158.345	158.345	0.94	0.94	0.94	0.94	0.94	1041.75	1041.75	1041.75	1041.75	285.125	285.125	285.125	285.125	0.94	0.94	30.7667		#REF!	#REF!	0.94		0.94	158.345		158.345
1932	-0.0503606	-0.0888498	-0.117549	66.9379	0.0669379	308.175	53.6842	308.175	308.175	308.175	308.175	159.472	159.472	159.472	159.472	159.472	0.847	0.847	0.847	0.847	0.847	1047.25	1047.25	1047.25	1047.25	285.3	285.3	285.3	285.3	0.847	0.847	35.6933		#REF!	#REF!	0.847		0.847	159.472		159.472
1933	-0.060725	-0.0887037	-0.108639	66.8278	0.0668278	308.6	55.4508	308.6	308.6	308.6	308.6	160.598	160.598	160.598	160.598	160.598	0.893	0.893	0.893	0.893	0.893	1052.75	1052.75	1052.75	1052.75	285.5	285.5	285.5	285.5	0.893	0.893	37.46		#REF!	#REF!	0.893		0.893	160.598		160.598
1934	-0.0467512	-0.090584	-0.0702552	68.2444	0.0682444	309	49.31	309	309	309	309	161.725	161.725	161.725	161.725	161.725	0.973	0.973	0.973	0.973	0.973	1058	1058	1058	1058	285.7	285.7	285.7	285.7	0.973	0.973	31.3192		#REF!	#REF!	0.973		0.973	161.725		161.725
1935	-0.00588438	-0.0923129	-0.0630583	69.547	0.069547	309.4	57.6525	309.4	309.4	309.4	309.4	162.851	162.851	162.851	162.851	162.851	1.027	1.027	1.027	1.027	1.027	1063	1063	1063	1063	285.9	285.9	285.9	285.9	1.027	1.027	39.6617		#REF!	#REF!	1.027		1.027	162.851		162.851
1936	0.0347812	-0.0935389	-0.051749	70.4706	0.0704706	309.75	57.425	309.75	309.75	309.75	309.75	163.977	163.977	163.977	163.977	163.977	1.13	1.13	1.13	1.13	1.13	1068	1068	1068	1068	286.1	286.1	286.1	286.1	1.13	1.13	39.4342		#REF!	#REF!	1.13		1.13	163.977		163.977
1937	0.0432469	-0.0939697	-0.0531198	70.7951	0.0707951	310	60.6667	310	310	310	310	165.104	165.104	165.104	165.104	165.104	1.209	1.209	1.209	1.209	1.209	1073	1073	1073	1073	286.275	286.275	286.275	286.275	1.209	1.209	42.6758		#REF!	#REF!	1.209		1.209	165.104		165.104
1938	0.0340156	-0.0892036	-0.0692271	67.2045	0.0672045	310.175	65.835	310.175	310.175	310.175	310.175	166.23	166.23	166.23	166.23	166.23	1.142	1.142	1.142	1.142	1.142	1078	1078	1078	1078	286.425	286.425	286.425	286.425	1.142	1.142	47.8442		#REF!	#REF!	1.142		1.142	166.23		166.23
1939	0.0270287	-0.0860344	-0.0685417	64.8169	0.0648169	310.3	66.2067	310.3	310.3	310.3	310.3	167.357	167.357	167.357	167.357	167.357	1.192	1.192	1.192	1.192	1.192	1083	1083	1083	1083	286.575	286.575	286.575	286.575	1.192	1.192	48.2158		#REF!	#REF!	1.192		1.192	167.357		167.357
1940	0.0173775	-0.0894646	-0.0486646	67.4011	0.0674011	310.375	61.5192	310.375	310.375	310.375	310.375	168.483	168.483	168.483	168.483	168.483	1.299	1.299	1.299	1.299	1.299	1088.25	1088.25	1088.25	1088.25	286.725	286.725	286.725	286.725	1.299	1.299	43.5283		#REF!	#REF!	1.299		1.299	168.483		168.483
1941	0.0032025	-0.0923869	-0.0394115	69.6027	0.0696027	310.375	76.4708	310.375	310.375	310.375	310.375	170.03	170.03	170.03	170.03	170.03	1.334	1.334	1.334	1.334	1.334	1093.75	1093.75	1093.75	1093.75	286.9	286.9	286.9	286.9	1.334	1.334	58.48		#REF!	#REF!	1.334		1.334	170.03		170.03
1942	-0.0161919	-0.0937358	-0.0610021	70.6189	0.0706189	310.3	77.6058	310.3	310.3	310.3	310.3	171.578	171.578	171.578	171.578	171.578	1.342	1.342	1.342	1.342	1.342	1099	1099	1099	1099	287.1	287.1	287.1	287.1	1.342	1.342	59.615		#REF!	#REF!	1.342		1.342	171.578		171.578
1943	-0.0332062	-0.0955012	-0.0661427	71.9489	0.0719489	310.2	75.1942	310.2	310.2	310.2	310.2	173.126	173.126	173.126	173.126	173.126	1.391	1.391	1.391	1.391	1.391	1104	1104	1104	1104	287.3	287.3	287.3	287.3	1.391	1.391	57.2033		#REF!	#REF!	1.391		1.391	173.126		173.126
1944	-0.0258125	-0.0989057	-0.0431813	74.5138	0.0745138	310.125	73.2967	310.125	310.125	310.125	310.125	174.673	174.673	174.673	174.673	174.673	1.383	1.383	1.383	1.383	1.383	1109.25	1109.25	1109.25	1109.25	287.525	287.525	287.525	287.525	1.383	1.383	55.3058		#REF!	#REF!	1.383		1.383	174.673		174.673
1945	0.00315	-0.104763	-0.0325573	78.9263	0.0789263	310.1	75.9392	310.1	310.1	310.1	310.1	176.221	176.221	176.221	176.221	176.221	1.16	1.16	1.16	1.16	1.16	1114.75	1114.75	1114.75	1114.75	287.775	287.775	287.775	287.775	1.16	1.16	57.9483		#REF!	#REF!	1.16		1.16	176.221		176.221
1946	0.0338888	-0.109074	-0.0253604	82.1747	0.0821747	310.125	81.675	310.125	310.125	310.125	310.125	177.768	177.768	177.768	177.768	177.768	1.238	1.238	1.238	1.238	1.238	1120.5	1120.5	1120.5	1120.5	288.025	288.025	288.025	288.025	1.238	1.238	63.6842		#REF!	#REF!	1.238		1.238	177.768		177.768
1947	0.0648375	-0.113312	-0.0335854	85.3673	0.0853673	310.2	81.9583	310.2	310.2	310.2	310.2	179.316	179.316	179.316	179.316	179.316	1.392	1.392	1.392	1.392	1.392	1126.75	1126.75	1126.75	1126.75	288.275	288.275	288.275	288.275	1.392	1.392	63.9675		#REF!	#REF!	1.392		1.392	179.316		179.316
1948	0.0826394	-0.121063	-0.0356417	91.2067	0.0912067	310.325	88.0333	310.325	310.325	310.325	310.325	180.863	180.863	180.863	180.863	180.863	1.469	1.469	1.469	1.469	1.469	1133.25	1133.25	1133.25	1133.25	288.525	288.525	288.525	288.525	1.469	1.469	70.0425		#REF!	#REF!	1.469		1.469	180.863		180.863
1949	0.0695625	-0.126526	-0.0431813	95.3223	0.0953223	310.5	87.6067	310.5	310.5	310.5	310.5	182.411	182.411	182.411	182.411	182.411	1.419	1.419	1.419	1.419	1.419	1140	1140	1140	1140	288.775	288.775	288.775	288.775	1.419	1.419	69.6158		#REF!	#REF!	1.419		1.419	182.411		182.411
1950	0.0339106	-0.13088	-0.0455802	98.6028	0.0986028	310.75	92.5133	310.75	310.75	310.75	310.75	183.959	183.959	183.959	183.959	183.959	1.63	1.63	1.63	1.63	1.63	1147.25	1147.25	1147.25	1147.25	289	289	289	289	1.63	1.63	74.5225		#REF!	#REF!	1.63		1.63	183.959		183.959
1951	0.00221375	-0.128672	-0.0418104	96.9391	0.0969391	311.1	103.135	311.1	311.1	311.1	311.1	189.11	189.11	189.11	189.11	189.11	1.768	1.768	1.768	1.768	1.768	1155	1155	1155	1155	289.2	289.2	289.2	289.2	1.767	1.767	85.1442		#REF!	#REF!	1.768		1.768	189.11		189.11
1952	-0.0150062	-0.125437	-0.0479792	94.5022	0.0945022	311.5	100.123	311.5	311.5	311.5	311.5	194.262	194.262	194.262	194.262	194.262	1.796	1.796	1.796	1.796	1.796	1163.5	1163.5	1163.5	1163.5	289.425	289.425	289.425	289.425	1.795	1.795	82.1325		#REF!	#REF!	1.796		1.796	194.262		194.262
1953	-0.0263506	-0.132055	-0.0568896	99.4883	0.0994883	311.925	102.607	311.925	311.925	311.925	311.925	199.413	199.413	199.413	199.413	199.413	1.841	1.841	1.841	1.841	1.841	1172.75	1172.75	1172.75	1172.75	289.675	289.675	289.675	289.675	1.841	1.841	84.6167		#REF!	#REF!	1.841		1.841	199.413		199.413
1954	-0.0247013	-0.139606	-0.051749	105.177	0.105177	312.425	100.962	312.425	312.425	312.425	312.425	204.565	204.565	204.565	204.565	204.565	1.865	1.865	1.865	1.865	1.865	1182.25	1182.25	1182.25	1182.25	289.9	289.9	289.9	289.9	1.865	1.865	82.9708		#REF!	#REF!	1.865		1.865	204.565		204.565
1955	0.0104475	-0.14458	-0.0294729	108.924	0.108924	313	104.124	313	313	313	313	209.716	209.716	209.716	209.716	209.716	2.043	2.043	2.043	2.043	2.043	1192	1192	1192	1192	290.125	290.125	290.125	290.125	2.042	2.042	86.1333		#REF!	#REF!	2.043		2.043	209.716		209.716
1956	0.0780544	-0.149495	-0.0171354	112.627	0.112627	313.6	98.9358	313.6	313.6	313.6	313.6	214.868	214.868	214.868	214.868	214.868	2.178	2.178	2.178	2.178	2.178	1202.25	1202.25	1202.25	1202.25	290.375	290.375	290.375	290.375	2.177	2.177	80.945		#REF!	#REF!	2.178		2.178	214.868		214.868
1957	0.13111	-0.156604	-0.00685417	117.983	0.117983	314.225	113.47	314.225	314.225	314.225	314.225	220.019	220.019	220.019	220.019	220.019	2.27	2.27	2.27	2.27	2.27	1213	1213	1213	1213	290.6	290.6	290.6	290.6	2.27	2.27	95.4792		#REF!	#REF!	2.27		2.27	220.019		220.019
1958	0.132711	-0.162509	-0.00171354	122.432	0.122432	314.848	116.636	314.848	314.848	314.848	314.848	225.171	225.171	225.171	225.171	225.171	2.33	2.33	2.33	2.33	2.33	1224	1224	1224	1224	290.825	290.825	290.825	290.825	2.33	2.33	98.645		#REF!	#REF!	2.33		2.33	225.171		225.171
1959	0.10465	-0.167827	-0.00548333	126.438	0.126438	315.5	115.31	315.5	315.5	315.5	315.5	230.322	230.322	230.322	230.322	230.322	2.462	2.462	2.462	2.462	2.462	1235.25	1235.25	1235.25	1235.25	291.1	291.1	291.1	291.1	2.454	2.454	97.3192		#REF!	#REF!	2.462		2.462	230.322		230.322
1960	0.0688187	-0.173895	-0.0805365	131.01	0.13101	316.272	116.729	316.272	316.272	316.272	316.272	235.474	235.474	235.474	235.474	235.474	2.577	2.577	2.577	2.577	2.577	1247	1247	1247	1247	291.4	291.4	291.4	291.4	2.569	2.569	98.7383		#REF!	#REF!	2.577		2.577	235.474		235.474
1961	0.0254538	-0.180374	-0.171697	135.891	0.135891	317.075	120.991	317.075	317.075	317.075	317.075	238.522	238.522	238.522	238.522	238.522	2.594	2.594	2.594	2.594	2.594	1259.25	1259.25	1259.25	1259.25	291.675	291.675	291.675	291.675	2.58	2.58	103		#REF!	#REF!	2.594		2.594	238.522		238.522
1962	-0.00744188	-0.188549	-0.246407	142.049	0.142049	317.795	117.303	317.795	317.795	317.795	317.795	241.571	241.571	241.571	241.571	241.571	2.7	2.7	2.7	2.7	2.7	1272	1272	1272	1272	291.925	291.925	291.925	291.925	2.686	2.686	99.3125		#REF!	#REF!	2.7		2.7	241.571		241.571
1963	-0.0194469	-0.196395	-0.727912	147.961	0.147961	318.397	117.591	318.397	318.397	318.397	318.397	244.619	244.619	244.619	244.619	244.619	2.848	2.848	2.848	2.848	2.848	1285	1285	1285	1285	292.225	292.225	292.225	292.225	2.833	2.833	99.6		#REF!	#REF!	2.848		2.848	244.619		244.619
1964	-0.0200156	-0.203163	-1.0857	153.059	0.153059	318.925	111.933	318.925	318.925	318.925	318.925	247.668	247.668	247.668	247.668	247.668	3.008	3.008	3.008	3.008	3.008	1298.25	1298.25	1298.25	1298.25	292.6	292.6	292.6	292.6	2.995	2.995	93.9417		#REF!	#REF!	3.008		3.008	247.668		247.668
1965	-0.00872813	-0.208716	-0.764925	157.243	0.157243	319.647	123.153	319.647	319.647	319.647	319.647	250.717	250.717	250.717	250.717	250.717	3.145	3.145	3.145	3.145	3.145	1312	1312	1312	1312	293	293	293	293	3.13	3.13	105.162		#REF!	#REF!	3.145		3.145	250.717		250.717
1966	0.0175394	-0.213818	-0.382463	161.087	0.161087	320.647	116.66	320.647	320.647	320.647	320.647	253.765	253.765	253.765	253.765	253.765	3.305	3.305	3.305	3.305	3.305	1326	1326	1326	1326	293.4	293.4	293.4	293.4	3.288	3.288	98.6692		#REF!	#REF!	3.305		3.305	253.765		253.765
1967	0.0449619	-0.222022	-0.253947	167.267	0.167267	321.605	116.07	321.605	321.605	321.605	321.605	256.814	256.814	256.814	256.814	256.814	3.411	3.411	3.411	3.411	3.411	1340.25	1340.25	1340.25	1340.25	293.8	293.8	293.8	293.8	3.393	3.393	98.0792		#REF!	#REF!	3.411		3.411	256.814		256.814
1968	0.0615825	-0.230459	-0.452718	173.624	0.173624	322.635	117.247	322.635	322.635	322.635	322.635	259.863	259.863	259.863	259.863	259.863	3.588	3.588	3.588	3.588	3.588	1355	1355	1355	1355	294.225	294.225	294.225	294.225	3.566	3.566	99.2567		#REF!	#REF!	3.588		3.588	259.863		259.863
1969	0.0708356	-0.234059	-0.528799	176.336	0.176336	323.902	126.577	323.902	323.902	323.902	323.902	262.911	262.911	262.911	262.911	262.911	3.8	3.8	3.8	3.8	3.8	1370.25	1370.25	1370.25	1370.25	294.7	294.7	294.7	294.7	3.78	3.78	108.586		#REF!	#REF!	3.8		3.8	262.911		262.911
1970	0.0615869	-0.231564	-0.287875	174.456	0.174456	324.985	124.434	324.985	324.985	324.985	324.985	265.96	265.96	265.96	265.96	265.96	4.076	4.076	4.076	4.076	4.076	1385.75	1385.75	1385.75	1385.75	295.2	295.2	295.2	295.2	4.053	4.053	106.443		#REF!	#REF!	4.076		4.076	265.96		265.96
1971	0.0406	-0.232455	-0.118234	175.128	0.175128	325.855	132.387	325.855	325.855	325.855	325.855	270.025	270.025	270.025	270.025	270.025	4.231	4.231	4.231	4.231	4.231	1401.25	1401.25	1401.25	1401.25	295.7	295.7	295.7	295.7	4.208	4.208	114.396		#REF!	#REF!	4.231		4.231	270.025		270.025
1972	0.0253312	-0.244577	-0.0791656	184.26	0.18426	327.14	136.887	327.14	327.14	327.14	327.14	274.09	274.09	274.09	274.09	274.09	4.399	4.399	4.399	4.399	4.399	1417	1417	1417	1417	296.225	296.225	296.225	296.225	4.376	4.376	118.897		#REF!	#REF!	4.399		4.399	274.09		274.09
1973	0.00414312	-0.257325	-0.126117	193.864	0.193864	328.678	136.499	328.678	328.678	328.678	328.678	278.155	278.155	278.155	278.155	278.155	4.635	4.635	4.635	4.635	4.635	1433	1433	1433	1433	296.8	296.8	296.8	296.8	4.614	4.614	118.508		#REF!	#REF!	4.635		4.635	278.155		278.155
1974	-0.0216694	-0.268668	-0.273139	202.41	0.20241	329.743	144.655	329.743	329.743	329.743	329.743	282.22	282.22	282.22	282.22	282.22	4.644	4.644	4.644	4.644	4.644	1449	1449	1449	1449	297.4	297.4	297.4	297.4	4.623	4.623	126.664		#REF!	#REF!	4.644		4.644	282.22		282.22
1975	-0.0368244	-0.282087	-0.373552	212.519	0.212519	330.585	143.532	330.585	330.585	330.585	330.585	286.285	286.285	286.285	286.285	286.285	4.615	4.615	4.615	4.615	4.615	1465	1465	1465	1465	298	298	298	298	4.596	4.596	125.541		#REF!	#REF!	4.615		4.615	286.285		286.285
1976	-0.0273394	-0.29256	-0.249834	220.41	0.22041	331.748	140.902	331.748	331.748	331.748	331.748	290.35	290.35	290.35	290.35	290.35	4.883	4.883	4.883	4.883	4.883	1481	1481	1481	1481	298.65	298.65	298.65	298.65	4.864	4.864	122.911		#REF!	#REF!	4.883		4.883	290.35		290.35
1977	0.0132606	-0.301094	-0.0983573	226.839	0.226839	333.272	136.594	333.272	333.272	333.272	333.272	294.415	294.415	294.415	294.415	294.415	5.029	5.029	5.029	5.029	5.029	1497.25	1497.25	1497.25	1497.25	299.36	299.36	299.36	299.36	5.026	5.026	118.603		#REF!	#REF!	5.029		5.029	294.415		294.415
1978	0.0758712	-0.30891	-0.123375	232.727	0.232727	334.848	141.941	334.848	334.848	334.848	334.848	298.48	298.48	298.48	298.48	298.48	5.105	5.105	5.105	5.105	5.105	1513.75	1513.75	1513.75	1513.75	300.082	300.082	300.082	300.082	5.087	5.087	123.95		#REF!	#REF!	5.105		5.105	298.48		298.48
1979	0.127286	-0.311307	-0.138454	234.533	0.234533	336.525	141.253	336.525	336.525	336.525	336.525	302.545	302.545	302.545	302.545	302.545	5.387	5.387	5.387	5.387	5.387	1530.25	1530.25	1530.25	1530.25	300.74	300.74	300.74	300.74	5.369	5.369	123.263		#REF!	#REF!	5.387		5.387	302.545		302.545
1980	0.146265	-0.321802	-0.0843062	242.44	0.24244	338.36	146.472	338.36	338.36	338.36	338.36	306.61	306.61	306.61	306.61	306.61	5.332	5.332	5.332	5.332	5.332	1547.75	1547.75	1547.75	1547.75	301.382	301.382	301.382	301.382	5.316	5.316	128.481		#REF!	#REF!	5.332		5.332	306.61		306.61
1981	0.133052	-0.335329	-0.152848	252.631	0.252631	339.728	157.161	339.728	339.728	339.728	339.728	310.013	310.013	310.013	310.013	310.013	5.168	5.168	5.168	5.168	5.168	1566.75	1566.75	1566.75	1566.75	302.22	302.22	302.22	302.22	5.152	5.152	139.17		#REF!	#REF!	5.168		5.168	310.013		310.013
1982	0.0955062	-0.338662	-0.823871	255.142	0.255142	340.793	150.776	340.793	340.793	340.793	340.793	313.415	313.415	313.415	313.415	313.415	5.127	5.127	5.127	5.127	5.127	1586.25	1586.25	1586.25	1586.25	303.098	303.098	303.098	303.098	5.113	5.113	132.785		#REF!	#REF!	5.127		5.127	313.415		313.415
1983	0.0530031	-0.343476	-1.10866	258.769	0.258769	342.197	156.306	342.197	342.197	342.197	342.197	316.817	316.817	316.817	316.817	316.817	5.11	5.11	5.11	5.11	5.11	1605.85	1605.85	1605.85	1605.85	303.805	303.805	303.805	303.805	5.094	5.094	138.315		#REF!	#REF!	5.11		5.11	316.817		316.817
1984	0.00780062	-0.348673	-0.552446	262.684	0.262684	343.783	155.637	343.783	343.783	343.783	343.783	320.22	320.22	320.22	320.22	320.22	5.29	5.29	5.29	5.29	5.29	1623.7	1623.7	1623.7	1623.7	304.397	304.397	304.397	304.397	5.28	5.28	137.647		#REF!	#REF!	5.29		5.29	320.22		320.22
1985	-0.0241369	-0.351331	-0.25566	264.687	0.264687	345.283	145.986	345.283	345.283	345.283	345.283	323.623	323.623	323.623	323.623	323.623	5.444	5.444	5.444	5.444	5.444	1637.99	1637.99	1637.99	1637.99	305.087	305.087	305.087	305.087	5.439	5.439	127.995		#REF!	#REF!	5.444		5.444	323.623		323.623
1986	-0.0251913	-0.354451	-0.1974	267.037	0.267037	346.798	145.125	346.798	346.798	346.798	346.798	327.025	327.025	327.025	327.025	327.025	5.61	5.61	5.61	5.61	5.61	1650.43	1650.43	1650.43	1650.43	305.772	305.772	305.772	305.772	5.607	5.607	127.134		#REF!	#REF!	5.61		5.61	327.025		327.025
1987	0.0007525	-0.35967	-0.166556	270.969	0.270969	348.645	150.699	348.645	348.645	348.645	348.645	330.427	330.427	330.427	330.427	330.427	5.753	5.753	5.753	5.753	5.753	1662.2	1662.2	1662.2	1662.2	306.262	306.262	306.262	306.262	5.752	5.752	132.708		#REF!	#REF!	5.753		5.753	330.427		330.427
1988	0.0577456	-0.364404	-0.126459	274.536	0.274536	350.738	151.953	350.738	350.738	350.738	350.738	333.83	333.83	333.83	333.83	333.83	5.964	5.964	5.964	5.964	5.964	1673.07	1673.07	1673.07	1673.07	307.195	307.195	307.195	307.195	5.965	5.965	133.962		#REF!	#REF!	5.964		5.964	333.83		333.83
1989	0.115876	-0.366944	-0.103155	276.449	0.276449	352.488	152.882	352.488	352.488	352.488	352.488	337.232	337.232	337.232	337.232	337.232	6.089	6.089	6.089	6.089	6.089	1683.47	1683.47	1683.47	1683.47	308.507	308.507	308.507	308.507	6.097	6.097	134.891		#REF!	#REF!	6.089		6.089	337.232		337.232
1990	0.127623	-0.368389	-0.105897	277.538	0.277538	353.855	159.234	353.855	353.855	353.855	353.855	340.635	340.635	340.635	340.635	340.635	6.144	6.144	6.144	6.144	6.144	1693.63	1693.63	1693.63	1693.63	309.485	309.485	309.485	309.485	6.141	6.141	141.243		#REF!	#REF!	6.144		6.144	340.635		340.635
1991	0.107787	-0.366465	-1.04732	276.088	0.276088	355.017	169.159	355.017	355.017	355.017	355.017	336.592	336.592	336.592	336.592	336.592	6.235	6.235	6.235	6.235	6.235	1703.82	1703.82	1703.82	1703.82	310.113	310.113	310.113	310.113	6.233	6.233	151.168		#REF!	#REF!	6.235		6.235	336.592		336.592
1992	0.0785487	-0.365647	-1.6522	275.472	0.275472	355.885	171.741	355.885	355.885	355.885	355.885	332.549	332.549	332.549	332.549	332.549	6.118	6.118	6.118	6.118	6.118	1711.8	1711.8	1711.8	1711.8	310.603	310.603	310.603	310.603	6.165	6.165	153.75		#REF!	#REF!	6.118		6.118	332.549		332.549
1993	0.0382069	-0.364982	-0.914346	274.971	0.274971	356.777	166.414	356.777	356.777	356.777	356.777	328.507	328.507	328.507	328.507	328.507	6.124	6.124	6.124	6.124	6.124	1716.29	1716.29	1716.29	1716.29	311.077	311.077	311.077	311.077	6.18	6.18	148.423		#REF!	#REF!	6.124		6.124	328.507		328.507
1994	0.00171938	-0.361807	-0.363956	272.579	0.272579	358.127	169.608	358.127	358.127	358.127	358.127	324.464	324.464	324.464	324.464	324.464	6.242	6.242	6.242	6.242	6.242	1721.01	1721.01	1721.01	1721.01	311.603	311.603	311.603	311.603	6.286	6.286	151.618		#REF!	#REF!	6.242		6.242	324.464		324.464
1995	-0.0207681	-0.355228	-0.173753	267.623	0.267623	359.837	176.256	359.837	359.837	359.837	359.837	320.421	320.421	320.421	320.421	320.421	6.372	6.372	6.372	6.372	6.372	1726.35	1726.35	1726.35	1726.35	312.295	312.295	312.295	312.295	6.42	6.42	158.265		#REF!	#REF!	6.372		6.372	320.421		320.421
1996	-0.0270988	-0.347607	-0.108639	261.881	0.261881	361.462	180.393	361.462	361.462	361.462	361.462	316.378	316.378	316.378	316.378	316.378	6.51	6.51	6.51	6.51	6.51	1730.01	1730.01	1730.01	1730.01	313.048	313.048	313.048	313.048	6.544	6.544	162.402		#REF!	#REF!	6.51		6.51	316.378		316.378
1997	-0.00389813	-0.351612	-0.0791656	264.898	0.264898	363.155	189.832	363.155	363.155	363.155	363.155	312.335	312.335	312.335	312.335	312.335	6.619	6.619	6.619	6.619	6.619	1734.82	1734.82	1734.82	1734.82	313.76	313.76	313.76	313.76	6.653	6.653	171.841		#REF!	#REF!	6.619		6.619	312.335		312.335
1998	0.0457669	-0.364139	-0.0448948	274.336	0.274336	365.322	183.344	365.322	365.322	365.322	365.322	308.293	308.293	308.293	308.293	308.293	6.588	6.588	6.588	6.588	6.588	1742.71	1742.71	1742.71	1742.71	314.533	314.533	314.533	314.533	6.644	6.644	165.353		#REF!	#REF!	6.588		6.588	308.293		308.293
1999	0.099435	-0.373879	-0.0161073	281.674	0.281674	367.348	188.123	367.348	367.348	367.348	367.348	304.25	304.25	304.25	304.25	304.25	6.569	6.569	6.569	6.569	6.569	1749.24	1749.24	1749.24	1749.24	315.257	315.257	315.257	315.257	6.611	6.611	170.132		#REF!	#REF!	6.569		6.569	304.25		304.25
2000	0.134374	-0.382408	-0.00376979	288.1	0.2881	368.865	191.693	368.865	368.865	368.865	368.865	300.207	300.207	300.207	300.207	300.207	6.735	6.735	6.735	6.735	6.735	1751.02	1751.02	1751.02	1751.02	315.85	315.85	315.85	315.85	6.766	6.766	173.702		#REF!	#REF!	6.735		6.735	300.207		300.207
2001	0.143745	-0.387205	0	291.714	0.291714	370.467	194.029	370.467	370.467	370.467	370.467	303.409	303.409	303.409	303.409	303.409	6.8959	6.8959	6.8959	6.8959	6.8959	1750.71	1750.71	1750.71	1750.71	316.488	316.488	316.488	316.488	6.929	6.929	176.038		#REF!	#REF!	6.8959		6.8959	303.409		303.409
2002	0.127334	-0.387115	0	291.645	0.291645	372.522		372.522	372.522	372.522	372.522	306.579	306.579	306.579	306.579	306.579	6.949	6.949	6.949	6.949	6.949	1752.19	1752.19	1752.19	1752.19	317.245	317.245	317.245	317.245	6.998	6.998	180.607		#REF!	#REF!	6.949		6.949	306.579		306.579
2003	0.08337	-0.387834	0	292.187	0.292187	374.76		374.76	374.76	374.76	374.76	309.716	309.716	309.716	309.716	309.716	7.286	7.286	7.286	7.286	7.286	1754.76	1754.76	1754.76	1754.76	318.017	318.017	318.017	318.017	7.421	7.421	189.807		#REF!	#REF!	7.286		7.286	309.716		309.716
2004	0.0392613	-0.389029	0	293.088	0.293088	376.812		376.812	376.812	376.812	376.812	312.824	312.824	312.824	312.824	312.824	7.6719	7.6719	7.6719	7.6719	7.6719	1755.07	1755.07	1755.07	1755.07	318.71	318.71	318.71	318.71	7.812	7.812	189.407		#REF!	#REF!	7.6719		7.6719	312.824		312.824
2005	0.0124512	-0.388029	-0.0484259	292.335	0.292335	378.812		378.812	378.812	378.812	378.812	310.869	315.903	315.903	315.903	315.903	7.971	7.971	7.971	7.971	7.971	1753.73	1753.73	1753.73	1753.73	319.44	319.44	319.44	319.44	8.04681	8.04681	189.507		#REF!	#REF!	7.971		7.971	310.869		310.869
2006	-0.00364	-0.383075	-0.164648	288.602	0.288602	380.827		380.827	380.827	380.827	380.827	318.696	320.061	317.24	317.662	322.158	8.1427	8.0985	8.081	8.1615	8.17169	1754.51	1754.51	1754.52	1754.51	320.2	320.2	320.2	320.2	8.17179	8.17179	193.807		#REF!	#REF!	8.17169		8.17169	318.696		318.696
2007	-0.0145513	-0.376335	-0.232444	283.524	0.283524	382.777		382.777	382.777	382.777	382.777	323.571	324.213	318.572	319.42	328.434	8.3136	8.226	8.1899	8.3523	8.2967	1757.68	1757.28	1757.39	1758.05	320.889	320.889	320.896	320.895	8.29676	8.29676	195.707		#REF!	#REF!	8.2967		8.2967	323.571		323.571
2008	-0.0211619	-0.369557		278.418	0.278418	384.8		384.8	384.8	384.8	384.8	328.446	328.349	319.896	321.175	334.754	8.48287	8.35313	8.29717	8.5434	8.4217	1761.98	1760.39	1760.82	1763.42	321.578	321.581	321.607	321.604	8.42174	8.42174	204.407		#REF!	#REF!	8.4217		8.4217	328.446		328.446
2009	0.0257119	-0.362763		273.299	0.273299	387.001		387.001	386.952	386.935	387.012	333.322	332.486	321.221	322.93	341.074	8.65213	8.48027	8.40443	8.7345	8.54671	1767.26	1763.78	1764.7	1770.44	322.267	322.273	322.332	322.326	8.54672	8.54672	210.207		#REF!	#REF!	8.54671		8.54671	333.322		333.322
2010	0.099435	-0.35497		267.428	0.267428	389.285		389.285	389.128	389.072	389.324	338.197	336.623	322.545	324.685	347.394	8.8214	8.6074	8.5117	8.9256	8.67171	1773.13	1767.1	1768.69	1778.67	322.957	322.967	323.071	323.061	8.67169	8.67169	217.907		#REF!	#REF!	8.67171		8.67171	338.197		338.197
2011	0.134374	-0.345179		260.052	0.260052	391.563		391.563	391.274	391.166	391.638	348.632	328.637	323.841	323.381	354.561	8.86803	8.73381	8.55557	9.18679	8.93928	1779.54	1770.37	1772.79	1788.03	323.646	323.661	323.826	323.809	8.72872	8.93166	219.507		#REF!	#REF!	8.93928		8.93928	348.632		348.632
2012		-0.334389		251.923	0.251923	393.843		393.843	393.421	393.241	394.009	359.067	320.652	325.137	322.078	361.728	8.91466	8.86022	8.59944	9.44798	9.20684	1784.55	1773.63	1776.56	1798.61	324.327	324.358	324.581	324.575	8.78575	9.19163	228.307		#REF!	#REF!	9.20684		9.20684	359.067		359.067
2013		-0.3236		243.794	0.243794	396.117		396.117	395.583	395.298	396.464	369.502	312.666	326.434	320.774	368.895	8.96129	8.98663	8.64331	9.70917	9.47441	1786.37	1776.92	1779.59	1810.52	324.993	325.056	325.325	325.364	8.84278	9.45159	219.907		#REF!	#REF!	9.47441		9.47441	369.502		369.502
2014		-0.31281		235.665	0.235665	398.396		398.396	397.764	397.346	399.004	379.937	304.681	327.73	319.471	376.063	9.00792	9.11304	8.68718	9.97036	9.74197	1785.29	1780.24	1781.97	1823.66	325.642	325.755	326.057	326.176	8.8998	9.71156			#REF!	#REF!	9.74197		9.74197	379.937		379.937
2015		-0.30202		227.536	0.227536	400.681		400.681	399.966	399.387	401.628	390.372	296.695	329.026	318.167	383.23	9.05455	9.23945	8.73105	10.2316	10.0095	1781.58	1783.65	1783.79	1837.97	326.276	326.456	326.778	327.01	8.95683	9.97153		#REF!	#REF!	#REF!	10.0095		10.0095	#REF!		390.372
2016								402.968	402.184	401.418	404.328	397.887	288.71	330.323	316.864	390.397	9.10118	9.36586	8.77492	10.4927	10.2022	1775.48	1787.14	1785.1	1853.35	326.894	327.159	327.486	327.867	8.92214	10.15			#REF!	#REF!	#REF!	1	9.9295	#REF!		397.887
2017								405.252	404.411	403.431	407.096	405.402	280.724	331.619	315.56	397.564	9.14781	9.49227	8.81879	10.7539	10.3949	1767.15	1790.68	1785.93	1869.71	327.496	327.863	328.183	328.746	8.88745	10.3284			#REF!	#REF!	#REF!	2	9.84947	#REF!		405.402
2018								407.529	406.643	405.425	409.927	412.917	272.739	332.915	314.257	404.732	9.19444	9.61868	8.86266	11.0151	10.5876	1756.77	1794.24	1786.3	1886.93	328.082	328.568	328.867	329.647	8.85276	10.5069			#REF!	#REF!	#REF!	3	9.76943	#REF!		412.917
2019								409.8	408.882	407.401	412.822	420.432	264.753	334.212	312.953	411.899	9.24107	9.74509	8.90653	11.2763	10.7803	1744.51	1797.83	1786.25	1904.94	328.653	329.275	329.54	330.57	8.81808	10.6853			#REF!	#REF!	#REF!	4	9.6894	#REF!		420.432
2020								412.068	411.129	409.36	415.78	427.947	256.768	335.508	311.65	419.066	9.2877	9.8715	8.9504	11.5375	10.973	1730.52	1801.43	1785.79	1923.67	329.208	329.983	330.202	331.514	8.78339	10.8638			#REF!	#REF!	#REF!	5	9.60936	#REF!		427.947
2021								414.326	413.378	411.298	418.796	432.868	254.654	335.857	313.116	425.58	9.07462	9.97968	9.05487	11.7677	11.0992	1714.87	1804.97	1784.89	1942.97	329.749	330.693	330.852	332.481	8.68464	10.9664			#REF!	#REF!	#REF!	6	9.46282	#REF!		432.868
2022								416.517	415.639	413.219	421.864	437.789	252.541	336.206	314.582	432.094	8.86154	10.0879	9.15934	11.9978	11.2254	1698.72	1808.3	1784.03	1962.65	330.278	331.404	331.502	333.466	8.5859	11.0691			#REF!	#REF!	#REF!	7	9.31627	#REF!		437.789
2023								418.603	417.936	415.144	424.995	442.71	250.427	336.555	316.048	438.608	8.64846	10.196	9.26381	12.228	11.3515	1683.31	1811.4	1783.73	1982.67	330.801	332.116	332.165	334.469	8.48716	11.1718			#REF!	#REF!	#REF!	8	9.16973	#REF!		442.71
2024								420.601	420.274	417.083	428.197	447.631	248.314	336.904	317.514	445.123	8.43538	10.3042	9.36828	12.4581	11.4777	1668.83	1814.32	1783.99	2003.02	331.318	332.828	332.841	335.489	8.38842	11.2744			#REF!	#REF!	#REF!	9	9.02318	#REF!		447.631
2025								422.516	422.656	419.036	431.475	452.553	246.2	337.253	318.98	451.637	8.2223	10.4124	9.47275	12.6883	11.6039	1655.37	1817.12	1784.79	2023.73	331.829	333.541	333.529	336.526	8.28967	11.3771			#REF!	#REF!	#REF!	10	8.87664	#REF!		452.553
2026								424.349	425.08	421.004	434.826	455.183	244.086	337.602	320.446	458.151	8.00922	10.5206	9.57722	12.9185	11.6714	1642.85	1819.83	1786.12	2044.8	332.335	334.255	334.23	337.58	8.15379	11.4092			#REF!	#REF!	#REF!	11	8.67136	#REF!		455.183
2027								426.097	427.538	422.978	438.245	457.814	241.973	337.951	321.912	464.665	7.79614	10.6288	9.68169	13.1486	11.7388	1631.19	1822.48	1787.96	2066.21	332.834	334.97	334.943	338.65	8.0179	11.4414		34	#REF!	#REF!	#REF!	12	8.46609	#REF!		457.814
2028								427.752	430.021	424.95	441.721	460.444	239.859	338.3	323.378	471.179	7.58306	10.7369	9.78616	13.3788	11.8063	1620.25	1825.04	1790.24	2087.9	333.327	335.685	335.669	339.737	7.88201	11.4735		36	#REF!	#REF!	#REF!	13	8.26081	#REF!		460.444
2029								429.314	432.523	426.916	445.251	463.075	237.746	338.649	324.844	477.693	7.36998	10.8451	9.89063	13.6089	11.8737	1609.95	1827.52	1792.91	2109.85	333.815	336.401	336.408	340.841	7.74612	11.5057			#REF!	#REF!	#REF!	14	8.05553	#REF!		463.075
2030								430.783	435.046	428.876	448.835	465.706	235.632	338.998	326.31	484.207	7.1569	10.9533	9.9951	13.8391	11.9412	1600.22	1829.91	1795.92	2132.01	334.297	337.118	337.159	341.96	7.61023	11.5378		0.225555	0.944444	#REF!	11.2778	15	7.85026	#REF!	#REF!	465.706
2031								432.163	437.589	430.832	452.474	464.41	234.572	338.856	328.092	493.525	6.8947	10.9918	10.151	14.1339	11.9079	1590.98	1832.21	1799.27	2154.37	334.774	337.836	337.922	343.096	7.42935	11.454			#REF!	#REF!	11.0522	16	7.54431	#REF!		464.41
2032								433.436	440.131	432.807	456.177	463.114	233.511	338.713	329.873	502.844	6.6325	11.0302	10.3069	14.4286	11.8747	1582.2	1834.26	1802.86	2177.39	335.244	338.551	338.697	344.247	7.24847	11.3702			#REF!	#REF!	10.8267	17	7.23835	#REF!		463.114
2033								434.593	442.664	434.831	459.964	461.818	232.451	338.571	331.655	512.162	6.3703	11.0687	10.4629	14.7233	11.8415	1573.88	1835.92	1806.67	2201.56	335.707	339.263	339.485	345.415	7.0676	11.2863			#REF!	#REF!	10.6011	18	6.9324	#REF!		461.818
2034								435.653	445.207	436.916	463.852	460.522	231.391	338.429	333.437	521.48	6.1081	11.1072	10.6188	15.0181	11.8083	1566.01	1837.27	1810.73	2226.85	336.163	339.971	340.285	346.599	6.88672	11.2025			#REF!	#REF!	10.3755	19	6.62645	#REF!		460.522
2035								436.628	447.77	439.068	467.85	459.227	230.33	338.286	335.218	530.798	5.8459	11.1456	10.7747	15.3128	11.775	1558.56	1838.38	1815.04	2253.2	336.613	340.676	341.097	347.8	6.70584	11.1187			#REF!	#REF!	10.15	20	6.3205	#REF!		459.227
2036								437.522	450.355	441.286	471.96	455.567	229.27	338.144	337	540.116	5.5837	11.1841	10.9306	15.6076	11.6812	1551.54	1839.31	1819.63	2280.57	337.055	341.376	341.922	349.015	6.51552	10.9596			#REF!	#REF!	9.92444	20	6.22666	#REF!		455.567
2037								438.334	452.963	443.567	476.182	451.907	228.21	338.002	338.782	549.434	5.3215	11.2226	11.0865	15.9024	11.5874	1544.93	1840.1	1824.51	2308.95	337.491	342.072	342.759	350.247	6.32521	10.8006			#REF!	#REF!	9.69888	20	6.13281	#REF!		451.907
2038								439.06	455.586	445.903	480.508	448.247	227.149	337.859	340.563	558.753	5.0593	11.2611	11.2425	16.1971	11.4935	1538.68	1840.79	1829.67	2338.24	337.92	342.765	343.607	351.494	6.13489	10.6416			#REF!	#REF!	9.47333	20	6.03897	#REF!		448.247
2039								439.691	458.215	448.282	484.927	444.243	226.089	337.717	342.345	568.071	4.7971	11.2995	11.3984	16.4918	11.3997	1532.76	1841.36	1835.06	2368.37	338.342	343.454	344.467	352.757	5.94457	10.4826			#REF!	#REF!	9.24777	20	5.94513	#REF!		444.587
2040								440.222	460.845	450.698	489.435	440.239	225.029	337.574	344.127	577.389	4.5349	11.338	11.5543	16.7866	11.3058	1527.1	1841.8	1840.65	2399.24	338.758	344.139	345.339	354.035	5.75426	10.3236			#REF!	#REF!	9.02222	20	5.85129	#REF!		440.927
2041								440.657	463.475	453.15	494.032	436.235	221.455	336.951	345.22	587.331	4.39997	11.3073	11.7033	17.1284	11.1291	1521.68	1842.13	1846.42	2430.8	339.168	344.82	346.223	355.328	5.55163	10.0614			#REF!	#REF!	8.79666	20	5.67456	#REF!		434.035
2042								441.025	466.093	455.645	498.73	432.231	217.882	336.327	346.314	597.274	4.26504	11.2767	11.8522	17.4702	10.9524	1516.03	1842.24	1852.23	2463.05	339.562	345.495	347.116	356.631	5.34899	9.79912			#REF!	#REF!	8.5711	20	5.49783	#REF!		427.143
2043								441.347	468.678	458.182	503.53	428.227	214.309	335.703	347.407	607.216	4.13011	11.246	12.0012	17.812	10.7757	1509.65	1841.99	1857.89	2495.89	339.934	346.163	348.02	357.939	5.14636	9.53685			#REF!	#REF!	8.34555	20	5.32111	#REF!		420.25
2044								441.621	471.234	460.762	508.433	424.223	210.736	335.079	348.501	617.159	3.99518	11.2153	12.1501	18.1538	10.5989	1502.6	1841.35	1863.35	2529.22	340.282	346.822	348.932	359.251	4.94373	9.27459			#REF!	#REF!	8.11999	20	5.14438	#REF!		413.358
2045								441.864	473.78	463.405	513.456	420.219	207.163	334.456	349.594	627.101	3.86025	11.1846	12.299	18.4956	10.4222	1494.99	1840.41	1868.69	2563.05	340.607	347.473	349.853	360.568	4.74109	9.01233			#REF!	#REF!	7.89444	20	4.96765	#REF!		406.466
2046								442.085	476.328	466.12	518.611	416.215	203.59	333.832	350.687	637.044	3.72532	11.154	12.448	18.8374	10.1795	1486.93	1839.23	1873.95	2597.4	340.91	348.115	350.783	361.89	4.54224	8.66361			#REF!	#REF!	7.66888	20	4.725	#REF!		397.002
2047								442.283	478.881	468.908	523.9	412.211	200.017	333.208	351.781	646.986	3.59039	11.1233	12.5969	19.1792	9.9369	1478.49	1837.87	1879.16	2632.27	341.19	348.75	351.723	363.216	4.34339	8.3149			#REF!	#REF!	7.44333	20	4.48236	#REF!		387.539
2048								442.458	481.438	471.768	529.324	408.207	196.444	332.584	352.874	656.929	3.45546	11.0926	12.7459	19.521	9.69426	1469.75	1836.38	1884.39	2667.68	341.447	349.377	352.67	364.546	4.14455	7.96618			#REF!	#REF!	7.21777	20	4.23971	#REF!		378.076
2049								442.601	483.993	474.692	534.875	404.203	192.871	331.961	353.968	666.871	3.32053	11.062	12.8948	19.8628	9.45161	1460.77	1834.8	1889.63	2703.61	341.683	349.996	353.627	365.881	3.9457	7.61747			#REF!	#REF!	6.99222	20	3.99706	#REF!		368.613
2050								442.7	486.535	477.67	540.543	400.199	189.298	331.337	355.061	676.814	3.1856	11.0313	13.0438	20.2046	9.20896	1451.54	1833.09	1894.85	2739.98	341.896	350.608	354.592	367.22	3.74685	7.26875			#REF!	#REF!	6.76666	20	3.75442	#REF!		359.15
2051								442.752	489.06	480.697	546.322	396.195	187.015	329.964	355.95	683.65	3.00896	10.8683	13.2219	20.5437	9.02478	1442.1	1831.28	1900.05	2776.74	342.087	351.211	355.566	368.563	3.67191	7.12337			#REF!	#REF!	6.54111	20	3.57024	#REF!		351.967
2052								442.761	491.536	483.777	552.212	392.191	184.732	328.592	356.839	690.486	2.83232	10.7053	13.3999	20.8829	8.84061	1432.71	1829.21	1905.16	2813.24	342.26	351.807	356.548	369.909	3.59697	6.978			#REF!	#REF!	6.31555	20	3.38606	#REF!		344.784
2053								442.734	493.932	486.916	558.212	388.187	182.449	327.219	357.727	697.322	2.65568	10.5423	13.578	21.222	8.65643	1423.62	1826.78	1910.09	2848.87	342.421	352.396	357.539	371.256	3.52204	6.83262			#REF!	#REF!	6.09	20	3.20188	#REF!		337.601
2054								442.663	496.244	490.103	564.313	384.183	180.166	325.846	358.616	704.158	2.47904	10.3793	13.756	21.5612	8.47225	1414.74	1823.93	1914.8	2883.57	342.569	352.978	358.539	372.604	3.4471	6.68725			#REF!	#REF!	5.86444	20	3.0177	#REF!		330.418
2055								442.548	498.474	493.338	570.517	380.179	177.883	324.473	359.505	710.994	2.3024	10.2163	13.9341	21.9003	8.28807	1406.01	1820.66	1919.23	2917.31	342.704	353.553	359.547	373.953	3.37216	6.54187			#REF!	#REF!	5.63888	20	2.83352	#REF!		323.235
2056								442.406	500.645	496.642	576.843	376.175	175.6	323.101	360.393	717.83	2.12576	10.0532	14.1122	22.2395	8.10389	1397.45	1817.05	1923.46	2950.25	342.826	354.12	360.564	375.304	3.29723	6.3965			#REF!	#REF!	5.41333	20	2.64934	#REF!		316.052
2057								442.248	502.768	500.022	583.305	372.171	173.317	321.728	361.282	724.666	1.94912	9.89023	14.2902	22.5786	7.91971	1389.08	1813.18	1927.55	2982.5	342.936	354.681	361.589	376.655	3.22229	6.25112			#REF!	#REF!	5.18777	20	2.46516	#REF!		308.869
2058								442.075	504.847	503.483	589.905	368.167	171.034	320.355	362.171	731.502	1.77248	9.72722	14.4683	22.9178	7.73553	1380.89	1809.09	1931.54	3014.16	343.033	355.235	362.623	378.008	3.14735	6.10575			#REF!	#REF!	4.96222	20	2.28098	#REF!		301.686
2059								441.886	506.884	507.023	596.647	364.163	168.751	318.982	363.059	738.338	1.59584	9.56421	14.6463	23.2569	7.55135	1372.91	1804.86	1935.48	3045.36	343.118	355.782	363.664	379.361	3.07242	5.96037			#REF!	#REF!	4.73666	20	2.0968	#REF!		294.503
2060								441.673	508.871	510.634	603.52	360.159	166.468	317.61	363.948	745.174	1.4192	9.4012	14.8244	23.5961	7.36717	1365.11	1800.51	1939.39	3076.13	343.192	356.322	364.714	380.716	2.99748	5.815			#REF!	#REF!	4.51111	20	1.91263	#REF!		287.32
2061								441.424	510.799	514.305	610.516	356.155	165.952	315.925	363.548	748.668	1.28885	9.1729	14.9926	23.8327	7.18299	1357.45	1796.03	1943.24	3106.48	343.253	356.856	365.772	382.072	2.92254	5.66962			#REF!	#REF!	4.28555	20	1.72845	#REF!		280.137
2062								441.135	512.647	518.027	617.605	352.151	165.436	314.241	363.149	752.162	1.1585	8.9446	15.1607	24.0693	6.99881	1350.23	1791.34	1946.83	3135.82	343.308	357.382	366.836	383.427	2.8476	5.52425			#REF!	#REF!	4.06	20	1.54427	#REF!		272.954
2063								440.803	514.402	521.797	624.764	348.148	164.92	312.556	362.749	755.656	1.02815	8.7163	15.3289	24.3059	6.81463	1343.69	1786.38	1950.02	3163.67	343.363	357.901	367.905	384.782	2.77267	5.37887			#REF!	#REF!	3.83444	20	1.36009	#REF!		265.771
2064								440.43	516.065	525.619	631.995	344.144	164.404	310.872	362.35	759.149	0.8978	8.488	15.497	24.5425	6.63045	1337.75	1781.18	1952.84	3190.13	343.417	358.411	368.979	386.135	2.69773	5.2335			#REF!	#REF!	3.60889	20	1.17591	#REF!		258.588
2065								440.01	517.629	529.486	639.291	340.14	163.888	309.187	361.95	762.643	0.76745	8.2597	15.6652	24.7792	6.44627	1332.3	1775.67	1955.22	3215.15	343.472	358.914	370.057	387.487	2.62279	5.08812			#REF!	#REF!	3.38333	20	0.991729	#REF!		251.405
2066								439.545	519.096	533.4	646.653	336.136	163.372	307.503	361.55	766.137	0.6371	8.0314	15.8334	25.0158	6.2621	1327.23	1769.85	1957.15	3238.75	343.526	359.409	371.14	388.837	2.54786	4.94275			#REF!	#REF!	3.15778	20	0.80755	#REF!		244.222
2067								439.052	520.488	537.381	654.098	332.132	162.856	305.818	361.151	769.631	0.50675	7.8031	16.0015	25.2524	6.07792	1322.55	1763.79	1958.71	3261.1	343.581	359.897	372.227	390.187	2.47292	4.79737			#REF!	#REF!	2.93222	20	0.623371	#REF!		237.039
2068								438.543	521.818	541.443	661.645	328.128	162.34	304.134	360.751	773.125	0.3764	7.5748	16.1697	25.489	5.89374	1318.24	1757.54	1959.97	3282.39	343.635	360.377	373.318	391.535	2.39798	4.652			#REF!	#REF!	2.70666	20	0.439191	#REF!		229.856
2069								438.019	523.089	545.589	669.305	324.124	161.824	302.449	360.352	776.619	0.24605	7.3465	16.3378	25.7256	5.70956	1314.27	1751.18	1960.99	3302.75	343.689	360.849	374.414	392.882	2.32305	4.50662			#REF!	#REF!	2.48111	20	0.255012	#REF!		222.673
2070								437.481	524.302	549.82	677.078	320.12	161.308	300.765	359.952	780.112	0.1157	7.1182	16.506	25.9622	5.52538	1310.65	1744.74	1961.83	3322.34	343.744	361.314	375.515	394.227	2.24811	4.36125			#REF!	#REF!	2.25555	20	0.0708327	#REF!		215.49
2071								436.919	525.451	554.129	684.954	316.116	160.685	298.769	357.95	784.241	0.06083	6.82459	16.5835	26.1066	5.3412	1307.33	1738.25	1962.51	3341.23	343.798	361.771	376.619	395.572	2.17317	4.21587			#REF!	#REF!	2.03	20	#REF!	#REF!		208.307
2072								436.343	526.509	558.486	692.902	312.112	160.062	296.773	355.948	788.369	0.00596	6.53098	16.6609	26.251	5.15702	1304.28	1731.61	1962.73	3359.54	343.851	362.22	377.725	396.916	2.09824	4.0705			#REF!	#REF!	1.80444	20	#REF!	#REF!		201.124
2073								435.764	527.457	562.867	700.894	308.108	159.439	294.776	353.946	792.497	-0.04891	6.23737	16.7384	26.3954	4.97284	1301.45	1724.77	1962.18	3377.41	343.901	362.661	378.828	398.261	2.0233	3.92512			#REF!	#REF!	1.57889	20	#REF!	#REF!		193.941
2074								435.182	528.296	567.272	708.932	304.104	158.815	292.78	351.943	796.625	-0.10378	5.94376	16.8158	26.5398	4.78866	1298.83	1717.72	1960.92	3394.86	343.947	363.093	379.927	399.607	1.94836	3.77975			#REF!	#REF!	1.35333	20	#REF!	#REF!		186.758
2075								434.595	529.027	571.701	717.015	300.1	158.192	290.784	349.941	800.753	-0.15865	5.65015	16.8933	26.6841	4.60448	1296.38	1710.49	1959.01	3411.91	343.991	363.517	381.024	400.954	1.87342	3.63437			#REF!	#REF!	1.12778	20	#REF!	#REF!		179.575
2076								433.995	529.643	576.146	725.136	296.096	157.569	288.788	347.939	804.881	-0.21352	5.35654	16.9708	26.8285	4.4203	1294.03	1703.03	1956.41	3428.43	344.031	363.932	382.118	402.302	1.79849	3.489			#REF!	#REF!	0.902222	20	#REF!	#REF!		172.392
2077								433.385	530.144	580.606	733.307	292.092	156.946	286.792	345.937	809.009	-0.26839	5.06293	17.0482	26.9729	4.23612	1291.74	1695.31	1953.13	3444.36	344.068	364.339	383.209	403.651	1.72355	3.34362			#REF!	#REF!	0.676666	20	#REF!	#REF!		165.209
2078								432.78	530.553	585.105	741.524	288.088	156.322	284.796	343.935	813.138	-0.32326	4.76932	17.1257	27.1173	4.05194	1289.52	1687.43	1949.27	3459.83	344.102	364.738	384.297	405	1.64861	3.19825			#REF!	#REF!	0.451111	20	#REF!	#REF!		158.026
2079								432.19	530.883	589.653	749.805	284.084	155.699	282.8	341.933	817.266	-0.37813	4.47571	17.2031	27.2617	3.86776	1287.41	1679.55	1944.92	3474.96	344.133	365.129	385.383	406.351	1.57368	3.05287			#REF!	#REF!	0.225555	20	#REF!	#REF!		150.843
2080								431.617	531.138	594.257	758.182	280.08	155.076	280.803	339.93	821.394	-0.433	4.1821	17.2806	27.4061	3.68359	1285.4	1671.83	1940.17	3489.84	344.161	365.511	386.465	407.702	1.49874	2.9075			#REF!	#REF!	-7.21645e-16	20	#REF!	#REF!		143.66
2081								431.058	531.319	598.918	766.645	276.076	154.412	280.067	332.939	826.329	-0.47674	4.18314	16.9839	27.4992	3.49941	1283.53	1664.28	1935.09	3504.58	344.186	365.885	387.545	409.054	1.4238	2.76212			#REF!	#REF!	#REF!	20	#REF!	#REF!		136.477
2082								430.51	531.49	603.538	775.174	272.072	153.749	279.33	325.947	831.265	-0.52048	4.18418	16.6871	27.5922	3.31523	1281.76	1657.12	1928.85	3519.35	344.208	366.254	388.618	410.408	1.34887	2.61675			#REF!	#REF!	#REF!	20	#REF!	#REF!		129.294
2083								429.964	531.702	608.02	783.751	268.068	153.085	278.593	318.955	836.2	-0.56422	4.18522	16.3904	27.6853	3.13105	1280.04	1650.49	1920.64	3534.26	344.227	366.618	389.682	411.766	1.27393	2.47137			#REF!	#REF!	#REF!	20	#REF!	#REF!		122.111
2084								429.414	531.942	612.364	792.366	264.064	152.421	277.856	311.964	841.136	-0.60796	4.18626	16.0936	27.7783	2.94687	1278.36	1644.32	1910.61	3549.26	344.242	366.979	390.736	413.126	1.19899	2.326			#REF!	#REF!	#REF!	20	#REF!	#REF!		114.928
2085								428.859	532.205	616.572	801.019	260.06	151.757	277.119	304.972	846.071	-0.6517	4.1873	15.7968	27.8714	2.76269	1276.72	1638.56	1898.9	3564.33	344.253	367.336	391.78	414.49	1.12405	2.18062			#REF!	#REF!	#REF!	20	#REF!	#REF!		107.745
2086								428.299	532.487	620.648	809.715	256.056	151.094	276.382	297.98	851.007	-0.69544	4.18834	15.5001	27.9645	2.57851	1275.1	1633.14	1885.67	3579.46	344.261	367.69	392.815	415.857	1.04912	2.03525			#REF!	#REF!	#REF!	20	#REF!	#REF!		100.562
2087								427.727	532.776	624.583	818.422	252.052	150.43	275.645	290.988	855.942	-0.73918	4.18938	15.2034	28.0575	2.39433	1273.45	1627.97	1870.96	3594.48	344.266	368.04	393.84	417.228	0.974181	1.88987			#REF!	#REF!	#REF!	20	#REF!	#REF!		93.3789
2088								427.143	533.07	628.381	827.157	248.048	149.766	274.908	283.997	860.878	-0.78292	4.19042	14.9066	28.1506	2.21015	1271.74	1622.96	1854.86	3609.26	344.268	368.386	394.856	418.601	0.899244	1.7445			#REF!	#REF!	#REF!	20	#REF!	#REF!		86.1959
2089								426.566	533.388	632.065	835.956	244.044	149.102	274.171	277.005	865.813	-0.82666	4.19146	14.6098	28.2436	2.02597	1270	1618.15	1837.53	3623.94	344.266	368.729	395.862	419.978	0.824307	1.59912			#REF!	#REF!	#REF!	20	#REF!	#REF!		79.0129
2090								426.005	533.741	635.649	844.805	240.04	148.439	273.434	270.013	870.749	-0.8704	4.1925	14.3131	28.3367	1.84179	1268.28	1613.55	1819.14	3638.59	344.261	369.068	396.859	421.357	0.74937	1.45375			#REF!	#REF!	#REF!	20	#REF!	#REF!		71.8299
2091								425.461	534.131	639.141	853.725	236.036	147.8	272.697	267.609	872.433	-0.87644	4.19355	14.2571	28.377	1.65761	1266.59	1609.17	1799.82	3653.31	344.253	369.404	397.847	422.74	0.674433	1.30837			#REF!	#REF!	#REF!	20	#REF!	#REF!		64.6469
2092								424.937	534.558	642.597	862.726	232.032	147.161	271.959	265.206	874.117	-0.88248	4.1946	14.2011	28.4174	1.47343	1264.97	1605.01	1780.48	3667.61	344.241	369.736	398.825	424.123	0.599496	1.163			#REF!	#REF!	#REF!	20	#REF!	#REF!		57.4639
2093								424.431	535.011	646.061	871.777	228.028	146.523	271.222	262.802	875.802	-0.88852	4.19565	14.1452	28.4577	1.28925	1263.45	1601.07	1761.92	3680.99	344.225	370.065	399.792	425.504	0.524559	1.01762			#REF!	#REF!	#REF!	20	#REF!	#REF!		50.2809
2094								423.931	535.48	649.515	880.864	224.024	145.884	270.484	260.398	877.486	-0.89456	4.1967	14.0892	28.498	1.10508	1261.99	1597.28	1744.04	3693.45	344.206	370.39	400.749	426.883	0.449622	0.87225			#REF!	#REF!	#REF!	20	#REF!	#REF!		43.0979
2095								423.431	535.955	652.951	889.982	220.02	145.246	269.747	257.994	879.17	-0.9006	4.19775	14.0332	28.5384	0.920896	1260.57	1593.63	1726.8	3705.04	344.184	370.712	401.694	428.259	0.374685	0.726875			#REF!	#REF!	#REF!	20	#REF!	#REF!		35.915
2096								422.929	536.435	656.364	899.124	216.016	144.607	269.009	255.591	880.854	-0.90664	4.1988	13.9772	28.5787	0.736717	1259.2	1590.09	1710.13	3715.82	344.157	371.031	402.629	429.633	0.299748	0.5815			#REF!	#REF!	#REF!	20	#REF!	#REF!		28.732
2097								422.428	536.92	659.754	908.289	212.012	143.969	268.271	253.187	882.538	-0.91268	4.19985	13.9212	28.619	0.552538	1257.86	1586.65	1693.98	3725.84	344.127	371.347	403.554	431.005	0.224811	0.436125			#REF!	#REF!	#REF!	20	#REF!	#REF!		21.549
2098								421.918	537.399	663.107	917.471	208.008	143.33	267.534	250.783	884.223	-0.91872	4.2009	13.8653	28.6593	0.368359	1256.49	1583.23	1678.41	3734.99	344.094	371.659	404.468	432.374	0.149874	0.29075			#REF!	#REF!	#REF!	20	#REF!	#REF!		14.366
2099								421.401	537.871	666.423	926.665	204.004	142.691	266.796	248.379	885.907	-0.92476	4.20195	13.8093	28.6997	0.184179	1255.07	1579.78	1663.53	3743.21	344.057	371.968	405.372	433.741	0.074937	0.145375			#REF!	#REF!	#REF!		#REF!	#REF!		7.18299
2100								420.895	538.358	669.723	935.874	200	142.053	266.059	245.975	887.591	-0.9308	4.203	13.7533	28.74	0	1253.63	1576.35	1649.4	3750.68	344.016	372.274	406.265	435.106	0	0			#REF!	#REF!	#REF!		#REF!	#REF!		0

## Sheet: albedos
Albedos for ESCIMO		150714
	Normal	Burnt	Deforested
Grass	0.16	0.08	0.3		Fisch et al 2006
Northern Forest	0.08	0.13	0.18		Lyons et al 2008 , esp Table 1
Tropical forest	0.14	0.1	0.168		Giambelluca et al 1997 esp Table 4
Tundra	0.23	0.23	0.23
Barren	0.17
Desert	0.24
Urban	0.15
Glaciers	0.4
Greenland	0.7
Antarctic	0.7
Ice on Water	0.7
Ocean	0.074

## Sheet: co2e
	GWP							GWP						Tipping point search						shape		Tipping point search
	25	7000	1	10000	298			25	7000	1	10000	298
	GtC/yr	kt/yr	GtC/yr	kt/yr	Mt/yr		CAT	GtC	kt	GtC	kt	Mt		% contribution to CO2e								% contribution to CO2e from 1850
C-ROADS INDC	CO2e distributed to ESCIMO real data						Pledges High	CO2e distributed to ESCIMO real data
	CH4	"Kyoto Flour emissions GtCO2e/yr"	CO2	"Montreal emissions GtCO2e/yr"	"N2O man made emissions GtCO2e/yr"			CH4	"Kyoto Flour emissions GtCO2e/yr"	CO2	"Montreal emissions GtCO2e/yr"	"N2O man made emissions GtCO2e/yr"		CH4	"Kyoto Flour emissions GtCO2e/yr"	CO2	"Montreal emissions GtCO2e/yr"	"N2O man made emissions GtCO2e/yr"				CH4	"Kyoto Flour emissions GtCO2e/yr"	CO2	"Montreal emissions GtCO2e/yr"	"N2O man made emissions GtCO2e/yr"
1990	0.255397	28.2843	6.10758	1984.35	7.57772		1990	0.255397	28.2843	6.10758	1984.35	7.57772		16.0001	0.37211	42.0891	37.2947	4.24408		0.967406	1850	80.5809	0.00402611	11.3881	0.802347	7.22457
1991	0.252444	30.2929	6.19874	1607.8	7.40235		1991	0.252444	30.2929	6.19874	1607.8	7.40235		16.9518	0.42718	45.7876	32.3895	4.44384		0.902536	1851	80.5635	0.00399434	11.3177	0.826828	7.28739
1992	0.249317	33.5771	6.08158	1506.53	7.78376		1992	0.249317	33.5771	6.08158	1506.53	7.78376		17.2313	0.487335	46.2353	31.2367	4.80941		0.876903	1852	79.712	0.00392471	11.699	0.84101	7.74402
1993	0.246475	39.1886	6.08626	1179.83	7.32829		1993	0.246475	39.1886	6.08626	1179.83	7.32829		18.3436	0.612478	49.8258	26.3423	4.87586		0.814338	1853	79.4538	0.0038824	11.9983	0.861892	7.6816
1994	0.243348	54.2057	6.20268	1014.23	7.50728		1994	0.243348	54.2057	6.20268	1014.23	7.50728		18.5987	0.870002	52.1468	23.2549	5.12951		0.792976	1854	77.9719	0.00378137	13.6794	0.869175	7.47577
1995	0.240221	68.4029	6.33506	957.697	7.62013		1995	0.240221	68.4029	6.33506	957.697	7.62013		18.3813	1.09916	53.3224	21.9844	5.21274		0.792046	1855	77.7951	0.0037472	13.9235	0.885946	7.39109
1996	0.237378	80.8529	6.46257	801.111	7.65104		1996	0.237378	80.8529	6.46257	801.111	7.65104		18.6329	1.33277	55.8004	18.8649	5.36905		0.772105	1856	77.0899	0.00368574	14.6724	0.901427	7.332
1997	0.234251	91.8086	6.57396	711.038	7.90977		1997	0.234251	91.8086	6.57396	711.038	7.90977		18.5812	1.5293	57.3602	16.9202	5.60909		0.764056	1857	76.9968	0.00365421	14.7442	0.922426	7.33295
1998	0.231125	103.984	6.54141	727.014	7.88419		1998	0.231125	103.984	6.54141	727.014	7.88419		18.3271	1.73155	57.0575	17.2947	5.58912		0.764307	1858	76.9159	0.00362615	14.8092	0.939174	7.33105
1999	0.228282	113.069	6.52267	682.043	7.53852		1999	0.228282	113.069	6.52267	682.043	7.53852		18.3872	1.91252	57.7912	16.4808	5.42835		0.75244	1859	76.2534	0.00356884	15.5158	0.953391	7.27381
2000	0.225155	144.459	6.68569	677.163	7.45661		2000	0.225155	144.459	6.68569	677.163	7.45661		17.8591	2.40625	58.3334	16.1136	5.28759		0.764077	1860	75.1662	0.00349455	16.68	0.961001	7.18978
2001	0.227631	159.481	6.84579	625.415	7.50443		2001	0.227631	159.481	6.84579	625.415	7.50443		17.9396	2.63944	59.3469	14.7867	5.28734		0.769014	1861	74.2168	0.00348468	17.3174	0.981188	7.48112
2002	0.22986	175.977	6.89402	610.205	7.54728		2002	0.22986	175.977	6.89402	610.205	7.54728		18.0184	2.89688	59.4456	14.35	5.28911		0.773146	1862	74.0624	0.00351587	17.8637	1.0186	7.05134
2003	0.232287	191.491	7.22868	626.466	7.59419		2003	0.232287	191.491	7.22868	626.466	7.59419		17.5511	3.03843	60.0803	14.2003	5.12979		0.802114	1863	72.8105	0.00349505	19.085	1.04003	7.06101
2004	0.234572	211.067	7.61927	603.485	7.64081		2004	0.234572	211.067	7.61927	603.485	7.64081		17.1675	3.24393	61.3392	13.2501	4.99929		0.828103	1864	71.5658	0.00347055	20.3146	1.05703	7.05861
2005	0.233198	224.543	7.89589	547.109	7.68272		2005	0.233198	224.543	7.89589	547.109	7.68272		16.8774	3.41271	62.8601	11.8789	4.97088		0.837404	1865	70.3428	0.00345018	21.5055	1.07646	7.07139
2006	0.239022	238.12	8.10242	557.65	7.715		2006	0.239022	238.12	8.10242	557.65	7.715		16.8734	3.53004	62.9176	11.8099	4.86898		0.858522	1866	69.6414	0.00345522	22.1262	1.10616	7.12269
2007	0.242793	260.36	8.22841	564.645	7.74685		2007	0.242793	260.36	8.22841	564.645	7.74685		16.8461	3.79364	62.8017	11.7533	4.80535		0.873481	1867	68.4348	0.00343137	23.3588	1.12206	7.08039
2008	0.246221	281.031	8.34286	566.159	7.77567		2008	0.246221	281.031	8.34286	566.159	7.77567		16.8377	4.03584	62.7577	11.615	4.75373		0.886251	1868	67.5046	0.00342469	24.2615	1.14531	7.08471
2009	0.249991	303.77	8.46867	568.007	7.80738		2009	0.249991	303.77	8.46867	568.007	7.80738		16.8283	4.29419	62.7082	11.4707	4.6985		0.900325	1869	66.3567	0.00340667	25.4162	1.16216	7.06106
2010	0.253892	326.209	8.59881	564.47	7.83661		2010	0.253892	326.209	8.59881	564.47	7.83661		16.8401	4.5437	62.7373	11.232	4.64687		0.913737	1870	65.5294	0.00340115	26.2151	1.1904	7.06175
2011	0.261229	337.907	8.84539	550.749	7.79211		2011	0.261229	337.907	8.84539	550.749	7.79211		16.9622	4.60762	63.1785	10.7284	4.52327		0.933375	1871	64.7146	0.00319668	26.1772	1.14396	7.96111
2012	0.26713	347.948	9.04297	531.59	7.68076		2012	0.246971	321.69	8.36054	491.474	7.10114		17.0901	4.67472	63.6393	10.2028	4.39303		0.95501	1872	63.334	0.0029791	27.106	1.08908	8.46746
2013	0.274725	360.173	9.29772	516.303	7.6208		2013	0.249857	327.57	8.45608	469.567	6.93096		17.2119	4.73872	64.0767	9.70414	4.26844		0.976669	1873	63.0953	0.00284438	27.4207	1.05974	8.421
2014	0.281489	371.096	9.52436	502.37	7.56319		2014	0.253824	334.625	8.58832	452.998	6.8199		17.3179	4.79445	64.4558	9.27211	4.15983		0.996373	1874	64.9202	0.00279858	25.5678	1.06466	8.44411
2015	0.291447	386.441	9.85868	484.29	7.56617		2015	0.258043	342.15	8.72873	428.783	6.69897		17.4521	4.85949	64.9381	8.69991	4.05043		1.01674	1875	64.452	0.00266189	26.2885	1.08529	8.17162
2016	0.299276	396.823	10.1207	497.299	7.76943		2016	0.260199	345.008	8.79923	432.365	6.75494		17.4552	4.86036	64.9318	8.70145	4.05116		1.01626	1876	64.8546	0.00258018	25.8648	1.10026	8.17732
2017	0.301551	399.838	10.1951	501.078	7.82848		2017	0.262794	348.448	8.88473	436.677	6.82232		17.4581	4.86116	64.926	8.70289	4.05183		1.01578	1877	65.3661	0.00249956	25.4655	1.11766	8.04823
2018	0.30369	402.675	10.2645	504.634	7.884		2018	0.265433	351.948	8.97141	441.063	6.89082		17.4613	4.86206	64.9196	8.70451	4.05257		1.0153	1878	65.9587	0.00242798	24.9807	1.13733	7.92075
2019	0.305703	405.344	10.3295	507.979	7.93627		2019	0.268117	355.507	9.0595	445.523	6.96051		17.4646	4.86298	64.9129	8.70614	4.05334		1.01482	1879	65.5544	0.0023338	25.6161	1.13089	7.69621
2020	0.30758	407.832	10.3901	511.097	7.98499		2020	0.270767	359.021	9.14659	449.926	7.02931		17.4676	4.86382	64.9068	8.70765	4.05405		1.01434	1880	64.2272	0.0022068	27.2776	1.12641	7.3666
2021	0.309326	410.146	10.446	513.998	8.03029		2021	0.273326	362.414	9.23028	454.179	7.09574		17.471	4.86476	64.9	8.70935	4.05482		1.01387	1881	64.3156	0.00213245	27.1857	1.1366	7.3603
2022	0.30746	407.673	10.3798	510.897	7.98187		2022	0.271509	360.005	9.16613	451.159	7.04857		17.4745	4.86572	64.8931	8.71105	4.05563		1.01339	1882	64.2868	0.00206574	27.6535	1.14442	6.91286
2023	0.305623	405.237	10.315	507.846	7.93421		2023	0.272597	361.446	9.2003	452.967	7.07681		17.4776	4.86659	64.8868	8.71263	4.05636		1.01291	1883	63.8739	0.00198511	28.2798	1.14654	6.69775
2024	0.303805	402.826	10.2504	504.825	7.887		2024	0.273771	363.004	9.23707	454.918	7.10731		17.4812	4.86757	64.8797	8.71439	4.05718		1.01243	1884	64.346	0.00193623	27.8939	1.17253	6.5854
2025	0.301982	400.409	10.1857	501.795	7.83968		2025	0.274956	364.575	9.27414	456.887	7.13807		17.4847	4.86856	64.8726	8.71615	4.05801		1.01195	1885	64.8156	0.0018956	27.4943	1.1972	6.49106
2026	0.300135	397.961	10.1205	498.727	7.79174		2026	0.276052	366.028	9.30844	458.709	7.16652		17.4879	4.86947	64.866	8.71778	4.05876		1.01148	1886	65.1012	0.0018469	27.1809	1.22027	6.49608
2027	0.300805	398.849	10.1399	499.84	7.80913		2027	0.277333	367.726	9.34866	460.837	7.19978		17.4916	4.87047	64.8588	8.71958	4.0596		1.011	1887	64.7812	0.00178437	27.662	1.23198	6.32278
2028	0.301385	399.618	10.1562	500.803	7.82417		2028	0.278646	369.468	9.38992	463.019	7.23386		17.4952	4.87149	64.8515	8.72139	4.06044		1.01052	1888	63.57	0.00170589	29.1256	1.22507	6.07784
2029	0.301856	400.242	10.1691	501.586	7.83638		2029	0.27997	371.222	9.43178	465.219	7.2682		17.4985	4.8724	64.8449	8.72304	4.0612		1.01004	1889	64.1003	0.00167272	28.6465	1.25932	5.99192
2030	0.302228	400.736	10.1783	502.204	7.84606		2030	0.281309	372.999	9.47384	467.444	7.303		17.5022	4.87343	64.8375	8.72487	4.06206		1.00956	1890	63.0603	0.00160213	29.9127	1.25722	5.76813
2031	0.302482	401.073	10.1836	502.626	7.85264		2031	0.282667	374.799	9.51648	469.7	7.33823		17.5058	4.87445	64.8301	8.72669	4.0629		1.00909	1891	62.4923	0.00156958	30.5377	1.28324	5.68501
2032	0.304803	404.15	10.2587	506.483	7.91289		2032	0.277949	368.543	9.35488	461.86	7.21573		17.5092	4.87538	64.8234	8.72836	4.06367		1.00861	1892	62.5894	0.00155253	30.4089	1.33295	5.66694
2033	0.307183	407.305	10.3355	510.437	7.97467		2033	0.278637	369.456	9.37503	463.003	7.23361		17.5128	4.8764	64.8161	8.73017	4.06453		1.00813	1893	62.9923	0.00154338	29.939	1.38353	5.6834
2034	0.309613	410.528	10.4139	514.475	8.03777		2034	0.278431	369.183	9.36509	462.661	7.22827		17.5165	4.87741	64.8088	8.73199	4.06538		1.00765	1894	62.5733	0.00151623	30.3799	1.41248	5.63302
2035	0.312087	413.808	10.4941	518.586	8.10199		2035	0.277741	368.268	9.33918	461.515	7.21037		17.5198	4.87833	64.8021	8.73364	4.06614		1.00717	1895	61.6414	0.00147578	31.3779	1.43867	5.54048
2036	0.314617	417.162	10.5758	522.789	8.16767		2036	0.276402	366.492	9.29119	459.289	7.1756		17.5234	4.87933	64.7949	8.73543	4.06698		1.00669	1896	61.2008	0.0014479	31.8203	1.48099	5.49664
2037	0.317065	420.408	10.6547	526.858	8.23122		2037	0.274843	364.425	9.23586	456.699	7.13512		17.527	4.88034	64.7877	8.73723	4.06781		1.00622	1897	60.4901	0.00141586	32.5756	1.50142	5.43125
2038	0.319546	423.698	10.735	530.982	8.29564		2038	0.273327	362.414	9.18231	454.18	7.09576		17.5302	4.88123	64.7812	8.73884	4.06856		1.00574	1898	59.5603	0.00137798	33.5549	1.53507	5.34813
2039	0.322075	427.051	10.8166	535.183	8.36129		2039	0.272634	361.496	9.15619	453.029	7.07777		17.5337	4.88221	64.7741	8.7406	4.06938		1.00526	1899	57.9114	0.124693	35.2242	1.53832	5.20116
2040	0.324645	430.458	10.8996	539.454	8.42801		2040	0.272057	360.73	9.13398	452.07	7.0628		17.5372	4.88318	64.767	8.74235	4.0702		1.00478	1900	57.1632	0.0116455	36.126	1.5642	5.13493
2041	0.327249	433.912	10.984	543.781	8.49563		2041	0.271058	359.406	9.09793	450.41	7.03687		17.5404	4.88406	64.7607	8.74391	4.07093		1.0043	1901	56.6195	0.00816355	36.7069	1.55869	5.10693
2042	0.330152	437.762	11.0781	548.605	8.571		2042	0.269605	357.48	9.04643	447.995	6.99914		17.5438	4.88502	64.7539	8.74561	4.07172		1.00383	1902	56.1968	0.00838636	37.1236	1.56432	5.10711
2043	0.333096	441.665	11.1736	553.497	8.6474		2043	0.267195	354.284	8.96292	443.99	6.93655		17.5471	4.88595	64.7471	8.74728	4.07248		1.00335	1903	54.6361	0.00825917	38.8138	1.53156	5.01005
2044	0.336076	445.616	11.2705	558.448	8.72475		2044	0.267004	354.031	8.95416	443.673	6.9316		17.5501	4.88679	64.7411	8.74877	4.07318		1.00287	1904	54.4884	0.008674	38.9005	1.54805	5.05422
2045	0.339103	449.629	11.3688	563.478	8.80334		2045	0.266889	353.879	8.94776	443.482	6.92862		17.5534	4.88769	64.7346	8.75039	4.07393		1.00239	1905	53.2615	0.00873371	40.1283	1.59843	5.00293
2046	0.34217	453.697	11.4684	568.575	8.88297		2046	0.26415	350.247	8.85345	438.931	6.85752		17.5565	4.88858	64.7282	8.75198	4.07468		1.00191	1906	51.9229	0.00876543	41.2184	1.91501	4.93478
2047	0.345161	457.663	11.5658	573.546	8.96063		2047	0.261426	346.636	8.75999	434.405	6.78681		17.5594	4.88936	64.7226	8.75337	4.07533		1.00143	1907	49.7907	0.00878728	43.5352	1.87305	4.79225
2048	0.348192	461.681	11.6643	578.581	9.03932		2048	0.259877	344.58	8.70574	431.83	6.74658		17.5624	4.89019	64.7165	8.75489	4.07603		1.00096	1908	50.8602	0.00935937	42.2378	1.93954	4.9531
2049	0.351254	465.741	11.7638	583.669	9.11882		2049	0.258011	342.106	8.64099	428.73	6.69815		17.5654	4.89102	64.7106	8.75636	4.07673		1.00048	1909	50.0719	0.0094428	43.0631	1.93278	4.92285
2050	0.354341	469.834	11.8644	588.8	9.19894		2050	0.255977	339.409	8.57089	425.35	6.64533		17.568	4.89174	64.7053	8.75768	4.07733		1	1910	49.2777	0.00965344	43.903	1.92279	4.88684
2051	0.357463	473.973	11.966	593.986	9.28		2051	0.255041	338.168	8.53745	423.795	6.62106		17.5708	4.89253	64.6996	8.75907	4.07799		0.98	1911	48.9154	0.0100703	44.1478	2.04153	4.88538
2052	0.360469	477.961	12.0637	598.983	9.35805		2052	0.249683	331.065	8.35608	414.893	6.48197		17.5735	4.89331	64.6941	8.76045	4.07863		0.96	1912	47.7	0.0101565	44.7505	2.7424	4.79693
2053	0.363491	481.966	12.1622	604.003	9.43646		2053	0.24939	330.676	8.34446	414.405	6.47433		17.576	4.89398	64.6892	8.76166	4.07918		0.94	1913	46.3927	0.0101917	46.3433	2.55128	4.70253
2054	0.366543	486.014	12.2615	609.075	9.51573		2054	0.250553	332.219	8.38143	416.338	6.50456		17.5786	4.89473	64.6839	8.76299	4.07981		0.92	1914	49.3546	0.0113114	44.0236	1.56748	5.04305
2055	0.369617	490.09	12.3615	614.184	9.59556		2055	0.250135	331.664	8.36556	415.644	6.49371		17.5812	4.89544	64.6786	8.76427	4.08041		0.9	1915	49.7984	0.0118875	43.4782	1.5867	5.12492
2056	0.372711	494.191	12.4624	619.324	9.67582		2056	0.24979	331.206	8.35232	415.07	6.48472		17.5835	4.89607	64.6741	8.76543	4.08093		0.88	1916	47.9284	0.011881	44.5765	2.5131	4.97016
2057	0.375757	498.231	12.5616	624.386	9.75491		2057	0.250014	331.503	8.35797	415.441	6.49052		17.586	4.89677	64.6691	8.76665	4.0815		0.86	1917	46.6592	0.0119871	45.5681	2.88733	4.87328
2058	0.378818	502.288	12.6612	629.471	9.83436		2058	0.249861	331.3	8.35109	415.187	6.48656		17.5884	4.89743	64.6642	8.76785	4.08206		0.84	1918	47.1911	0.0125518	44.8723	2.96524	4.95876
2059	0.381898	506.373	12.7617	634.589	9.91432		2059	0.249152	330.361	8.32583	414.009	6.46816		17.5906	4.89805	64.6599	8.76892	4.08257		0.82	1919	50.4801	0.0140053	40.9531	3.2165	5.33629
2060	0.384993	510.476	12.8626	639.733	9.99468		2060	0.247875	328.667	8.28148	411.888	6.43501		17.5929	4.89867	64.6553	8.77009	4.0831		0.8	1920	47.6742	0.0137646	44.1531	3.09287	5.06626
2061	0.388098	514.594	12.9637	644.892	10.0753		2061	0.246732	327.152	8.24166	409.988	6.40533		17.5951	4.89931	64.6508	8.7712	4.08362		0.78	1921	50.6844	0.0152229	40.5532	3.33093	5.4162
2062	0.389957	517.059	13.0236	647.982	10.1236		2062	0.245936	326.095	8.21362	408.665	6.38467		17.5971	4.89986	64.6467	8.7722	4.08409		0.76	1922	49.8165	0.106792	41.4326	3.28712	5.35698
2063	0.391794	519.496	13.0825	651.034	10.1713		2063	0.244793	324.581	8.17391	406.765	6.35499		17.5992	4.90046	64.6425	8.77325	4.08458		0.74	1923	47.036	0.116921	44.5749	3.18233	5.08994
2064	0.393615	521.908	13.1409	654.058	10.2185		2064	0.243828	323.301	8.14023	405.163	6.32996		17.6013	4.90103	64.6383	8.77427	4.08507		0.72	1924	47.2773	0.122524	44.2119	3.23988	5.14841
2065	0.395413	524.294	13.1988	657.046	10.2652		2065	0.241195	319.811	8.05103	400.788	6.26162		17.6031	4.90156	64.6346	8.7752	4.0855		0.7	1925	46.9875	0.127344	44.1635	3.56401	5.15767
2066	0.397194	526.655	13.2559	660.008	10.3115		2066	0.238082	315.683	7.94575	395.616	6.1808		17.6051	4.90209	64.6307	8.77619	4.08595		0.68	1926	46.8638	0.132976	44.2072	3.60786	5.18826
2067	0.399046	529.111	13.3155	663.083	10.3595		2067	0.234808	311.341	7.83514	390.174	6.09578		17.607	4.90263	64.6268	8.77713	4.0864		0.66	1927	45.4481	0.134397	45.801	3.54528	5.07132
2068	0.400871	531.53	13.3744	666.117	10.4069		2068	0.237203	314.516	7.91388	394.154	6.15796		17.6087	4.90309	64.6235	8.77798	4.08679		0.64	1928	45.4407	0.14071	45.7105	3.59508	5.11313
2069	0.402681	533.929	13.4327	669.125	10.4539		2069	0.236746	313.91	7.89741	393.395	6.14612		17.6105	4.90357	64.6199	8.77886	4.08721		0.62	1929	44.0744	0.144684	47.219	3.5645	4.99757
2070	0.404472	536.306	13.4904	672.1	10.5004		2070	0.235663	312.475	7.86009	391.595	6.118		17.6122	4.90407	64.6164	8.77971	4.08761		0.6	1930	45.7823	0.213669	45.0624	3.71906	5.22255
2071	0.406239	538.647	13.5475	675.037	10.5462		2071	0.234831	311.37	7.83127	390.212	6.09635		17.6137	4.90449	64.6133	8.78049	4.08794		0.58	1931	48.2958	0.176536	42.0086	3.98333	5.53568
2072	0.407819	540.745	13.5983	677.662	10.5873		2072	0.233123	309.107	7.77322	387.374	6.05202		17.6154	4.90495	64.6101	8.78128	4.08831		0.56	1932	50.3965	0.192857	39.2769	4.33776	5.79594
2073	0.409387	542.82	13.6486	680.267	10.6279		2073	0.231481	306.928	7.71739	384.645	6.00938		17.6169	4.90537	64.6069	8.78208	4.08868		0.54	1933	49.097	0.196066	39.9436	5.10567	5.65778
2074	0.41094	544.882	13.6988	682.849	10.6683		2074	0.229614	304.455	7.65424	381.544	5.96093		17.6183	4.90578	64.6042	8.78278	4.089		0.52	1934	47.4449	0.198552	41.8218	5.06096	5.47378
2075	0.412484	546.927	13.7485	685.413	10.7083		2075	0.227667	301.872	7.58836	378.308	5.91038		17.6198	4.90616	64.6012	8.78349	4.08934		0.5	1935	46.4045	0.203411	43.0002	5.0349	5.35694
2076	0.414015	548.96	13.7978	687.956	10.7481		2076	0.224767	298.027	7.49078	373.488	5.83509		17.6211	4.90657	64.5984	8.78416	4.08966		0.48	1936	44.6953	0.204471	45.0053	4.9325	5.16238
2077	0.415595	551.054	13.849	690.583	10.7891		2077	0.224739	297.991	7.48907	373.444	5.8344		17.6224	4.9069	64.596	8.78479	4.08995		0.46	1937	43.3635	0.207909	46.5193	4.89547	5.01387
2078	0.417161	553.131	13.8996	693.182	10.8298		2078	0.225595	299.126	7.51674	374.864	5.85661		17.6237	4.90727	64.5934	8.7854	4.09025		0.44	1938	44.5501	0.223896	44.8883	5.17554	5.16214
2079	0.418716	555.191	13.95	695.77	10.8702		2079	0.225108	298.479	7.49969	374.056	5.84395		17.6249	4.90759	64.591	8.78604	4.09053		0.42	1939	43.8026	0.229744	45.6529	5.22255	5.09218
2080	0.420262	557.24	14.0002	698.34	10.9103		2080	0.224154	297.214	7.46723	372.472	5.81922		17.6259	4.90787	64.5888	8.78659	4.09079		0.4	1940	42.0109	0.230996	47.4476	5.39959	4.91087
2081	0.421803	559.285	14.0501	700.899	10.9503		2081	0.223019	295.709	7.42868	370.584	5.78974		17.627	4.9082	64.5866	8.78712	4.09105		0.38	1941	41.5233	0.238673	47.7157	5.56593	4.95636
2082	0.423001	560.871	14.0887	702.889	10.9814		2082	0.22258	295.126	7.41338	369.854	5.77835		17.6281	4.90847	64.5845	8.78763	4.09129		0.36	1942	41.4198	0.245433	47.458	5.72176	5.15497
2083	0.424173	562.429	14.1266	704.837	11.0119		2083	0.222404	294.895	7.40693	369.563	5.7738		17.629	4.90876	64.5827	8.78809	4.09151		0.34	1943	40.69	0.249698	47.8857	5.78676	5.38786
2084	0.425332	563.961	14.164	706.759	11.042		2084	0.219508	291.053	7.30988	364.75	5.69862		17.63	4.90899	64.5808	8.78854	4.09173		0.32	1944	40.7961	0.259643	47.0584	6.06136	5.82451
2085	0.426471	565.475	14.2009	708.656	11.0715		2085	0.218218	289.345	7.26636	362.608	5.66513		17.6308	4.90926	64.579	8.78901	4.09194		0.3	1945	43.5961	0.287057	42.2952	7.11286	6.70881
2086	0.427592	566.96	14.2373	710.516	11.1005		2086	0.215813	286.154	7.18578	358.609	5.60261		17.6316	4.90945	64.5775	8.78934	4.09206		0.28	1946	41.9027	0.286818	42.7383	8.07504	6.99725
2087	0.428866	568.653	14.2787	712.636	11.1336		2087	0.213964	283.704	7.12374	355.538	5.5546		17.6323	4.9097	64.576	8.78977	4.09223		0.26	1947	39.1003	0.278509	44.5171	9.06507	7.03894
2088	0.430121	570.311	14.3196	714.717	11.1663		2088	0.212563	281.844	7.07665	353.208	5.51833		17.6331	4.90986	64.5746	8.79009	4.09248		0.24	1948	37.9965	0.280915	45.1332	9.33307	7.2563
2089	0.431363	571.967	14.3602	716.786	11.1985		2089	0.212501	281.767	7.07425	353.109	5.51667		17.6336	4.91008	64.5733	8.79041	4.09255		0.22	1949	38.2166	0.294569	43.5357	10.2662	7.68704
2090	0.432601	573.601	14.4007	718.838	11.2305		2090	0.211928	281.003	7.05477	352.153	5.50175		17.6343	4.9102	64.5722	8.79068	4.09269		0.2	1950	35.992	0.303622	46.7825	9.42674	7.4953
2091	0.433827	575.234	14.4408	720.882	11.2624		2091	0.211067	279.864	7.02579	350.725	5.4794		17.6348	4.9104	64.571	8.791	4.0928		0.18	1951	35.2714	0.303229	48.2085	8.83986	7.37695
2092	0.434767	576.475	14.4715	722.435	11.2868		2092	0.209721	278.078	6.98072	348.486	5.4445		17.6352	4.91049	64.5702	8.79115	4.09293		0.16	1952	35.2472	0.309903	47.7141	9.35129	7.3775
2093	0.435694	577.698	14.5019	723.985	11.3109		2093	0.20878	276.826	6.94915	346.926	5.42007		17.6356	4.91054	64.5694	8.79144	4.09303		0.14	1953	35.0088	0.315191	47.3027	10.074	7.29913
2094	0.436628	578.941	14.5324	725.528	11.3351		2094	0.207653	275.334	6.91136	345.048	5.39077		17.6361	4.9107	64.5686	8.79155	4.0931		0.12	1954	34.945	0.321885	46.6619	10.8322	7.23902
2095	0.437564	580.174	14.5632	727.087	11.3595		2095	0.207977	275.76	6.92196	345.588	5.39923		17.6364	4.91072	64.5679	8.79175	4.09321		0.1	1955	33.571	0.317403	47.8784	11.337	6.89623
2096	0.438502	581.431	14.5941	728.639	11.3839		2096	0.207489	275.12	6.90559	344.775	5.38658		17.6366	4.9109	64.5674	8.79178	4.09327		0.08	1956	32.5577	0.316389	48.3397	12.1582	6.62806
2097	0.439555	582.811	14.629	730.407	11.4113		2097	0.206654	274.005	6.87774	343.397	5.36494		17.6367	4.91079	64.5671	8.79205	4.09332		0.06	1957	32.0231	0.319273	48.3379	12.8524	6.46726
2098	0.440602	584.232	14.6636	732.122	11.4388		2098	0.205592	272.613	6.8423	341.621	5.33753		17.6368	4.9111	64.5667	8.79183	4.09347		0.04	1958	31.8918	0.327401	48.3044	13.0864	6.39001
2099	0.441648	585.59	14.6987	733.908	11.4666		2099	0.203342	269.615	6.76754	337.903	5.27939		17.6365	4.91077	64.5668	8.79224	4.09362		0.02	1959	31.1294	0.329713	48.7404	13.6019	6.19858
2100	0.442561	587.903	14.7341	734.973	11.4714		2100	0.20039	266.199	6.67153	332.792	5.19419		17.6304	4.91829	64.5663	8.78378	4.08548		0	1960	30.3634	0.339619	48.5984	14.6748	6.02374
																					1961	29.9481	0.348647	47.6638	16.0169	6.02247
																					1962	28.8746	0.364562	47.2884	17.5049	5.96753
																					1963	27.7198	0.532802	47.1649	18.6613	5.92118
																					1964	26.5306	0.467821	47.1451	19.9349	5.92155
																					1965	25.5245	0.448062	46.8993	21.1766	5.95149
																					1966	24.5113	0.42883	46.647	22.4394	5.97348
																					1967	23.5791	0.424731	45.8101	24.2133	5.97278
																					1968	22.5316	0.392356	45.5693	25.6954	5.81138
																					1969	21.5573	0.38056	45.505	26.9062	5.65095
																					1970	20.5592	0.339356	46.0755	27.5554	5.47048
																					1971	19.9619	0.364994	45.769	28.9587	4.94541
																					1972	19.1808	0.345049	44.9738	30.5696	4.9308
																					1973	18.1897	0.331391	44.3083	32.4586	4.71199
																					1974	17.8872	0.299959	42.9941	34.3278	4.49079
																					1975	18.1129	0.329119	42.7004	34.2289	4.62863
																					1976	17.4904	0.327941	42.9834	34.6716	4.52676
																					1977	17.1316	0.309662	42.7577	35.2688	4.53219
																					1978	16.5669	0.324238	41.393	37.3363	4.37954
																					1979	17.1756	0.321684	44.6716	33.0889	4.7422
																					1980	16.7674	0.350878	42.5305	35.7543	4.59699
																					1981	17.5345	0.35014	42.7424	34.7541	4.61894
																					1982	17.7151	0.371016	42.3126	34.8049	4.79644
																					1983	17.3313	0.355721	40.8409	36.7711	4.70093
																					1984	16.8701	0.346493	40.6511	37.7015	4.43084
																					1985	17.189	0.353763	42.2019	35.8128	4.44257
																					1986	16.228	0.37098	40.6433	38.5697	4.18811
																					1987	15.8086	0.350189	40.1413	39.4502	4.24971
																					1988	15.7387	0.343391	41.0193	38.851	4.04766
																					1989	16.4667	0.380491	43.3655	35.5171	4.27023
																					1990	16.0001	0.37211	42.0891	37.2947	4.24408
																					1991	16.9518	0.42718	45.7876	32.3895	4.44384
																					1992	17.2313	0.487335	46.2353	31.2367	4.80941
																					1993	18.3436	0.612478	49.8258	26.3423	4.87586
																					1994	18.5987	0.870002	52.1468	23.2549	5.12951
																					1995	18.3813	1.09916	53.3224	21.9844	5.21274
																					1996	18.6329	1.33277	55.8004	18.8649	5.36905
																					1997	18.5812	1.5293	57.3602	16.9202	5.60909
																					1998	18.3271	1.73155	57.0575	17.2947	5.58912
																					1999	18.3872	1.91252	57.7912	16.4808	5.42835
																					2000	17.8591	2.40625	58.3334	16.1136	5.28759
																					2001	17.9396	2.63944	59.3469	14.7867	5.28734
																					2002	18.0184	2.89688	59.4456	14.35	5.28911
																					2003	17.5511	3.03843	60.0803	14.2003	5.12979
																					2004	17.1675	3.24393	61.3392	13.2501	4.99929
																					2005	16.8774	3.41271	62.8601	11.8789	4.97088
																					2006	16.8734	3.53004	62.9176	11.8099	4.86898
																					2007	16.8461	3.79364	62.8017	11.7533	4.80535
																					2008	16.8377	4.03584	62.7577	11.615	4.75373
																					2009	16.8283	4.29419	62.7082	11.4707	4.6985
																					2010	16.8401	4.5437	62.7373	11.232	4.64687
																					2011	16.9622	4.60762	63.1785	10.7284	4.52327
																					2012	17.0901	4.67472	63.6393	10.2028	4.39303
																					2013	17.2119	4.73872	64.0767	9.70414	4.26844
																					2014	17.3179	4.79445	64.4558	9.27211	4.15983
																					2015	17.4521	4.85949	64.9381	8.69991	4.05043
																					2016	17.4552	4.86036	64.9318	8.70145	4.05116
																					2017	17.4581	4.86116	64.926	8.70289	4.05183
																					2018	17.4613	4.86206	64.9196	8.70451	4.05257
																					2019	17.4646	4.86298	64.9129	8.70614	4.05334
																					2020	17.4676	4.86382	64.9068	8.70765	4.05405
																					2021	17.471	4.86476	64.9	8.70935	4.05482
																					2022	17.4745	4.86572	64.8931	8.71105	4.05563
																					2023	17.4776	4.86659	64.8868	8.71263	4.05636
																					2024	17.4812	4.86757	64.8797	8.71439	4.05718
																					2025	17.4847	4.86856	64.8726	8.71615	4.05801
																					2026	17.4879	4.86947	64.866	8.71778	4.05876
																					2027	17.4916	4.87047	64.8588	8.71958	4.0596
																					2028	17.4952	4.87149	64.8515	8.72139	4.06044
																					2029	17.4985	4.8724	64.8449	8.72304	4.0612
																					2030	17.5022	4.87343	64.8375	8.72487	4.06206
																					2031	17.5058	4.87445	64.8301	8.72669	4.0629
																					2032	17.5092	4.87538	64.8234	8.72836	4.06367
																					2033	17.5128	4.8764	64.8161	8.73017	4.06453
																					2034	17.5165	4.87741	64.8088	8.73199	4.06538
																					2035	17.5198	4.87833	64.8021	8.73364	4.06614
																					2036	17.5234	4.87933	64.7949	8.73543	4.06698
																					2037	17.527	4.88034	64.7877	8.73723	4.06781
																					2038	17.5302	4.88123	64.7812	8.73884	4.06856
																					2039	17.5337	4.88221	64.7741	8.7406	4.06938
																					2040	17.5372	4.88318	64.767	8.74235	4.0702
																					2041	17.5404	4.88406	64.7607	8.74391	4.07093
																					2042	17.5438	4.88502	64.7539	8.74561	4.07172
																					2043	17.5471	4.88595	64.7471	8.74728	4.07248
																					2044	17.5501	4.88679	64.7411	8.74877	4.07318
																					2045	17.5534	4.88769	64.7346	8.75039	4.07393
																					2046	17.5565	4.88858	64.7282	8.75198	4.07468
																					2047	17.5594	4.88936	64.7226	8.75337	4.07533
																					2048	17.5624	4.89019	64.7165	8.75489	4.07603
																					2049	17.5654	4.89102	64.7106	8.75636	4.07673
																					2050	17.568	4.89174	64.7053	8.75768	4.07733
																					2051	17.5708	4.89253	64.6996	8.75907	4.07799
																					2052	17.5735	4.89331	64.6941	8.76045	4.07863
																					2053	17.576	4.89398	64.6892	8.76166	4.07918
																					2054	17.5786	4.89473	64.6839	8.76299	4.07981
																					2055	17.5812	4.89544	64.6786	8.76427	4.08041
																					2056	17.5835	4.89607	64.6741	8.76543	4.08093
																					2057	17.586	4.89677	64.6691	8.76665	4.0815
																					2058	17.5884	4.89743	64.6642	8.76785	4.08206
																					2059	17.5906	4.89805	64.6599	8.76892	4.08257
																					2060	17.5929	4.89867	64.6553	8.77009	4.0831
																					2061	17.5951	4.89931	64.6508	8.7712	4.08362
																					2062	17.5971	4.89986	64.6467	8.7722	4.08409
																					2063	17.5992	4.90046	64.6425	8.77325	4.08458
																					2064	17.6013	4.90103	64.6383	8.77427	4.08507
																					2065	17.6031	4.90156	64.6346	8.7752	4.0855
																					2066	17.6051	4.90209	64.6307	8.77619	4.08595
																					2067	17.607	4.90263	64.6268	8.77713	4.0864
																					2068	17.6087	4.90309	64.6235	8.77798	4.08679
																					2069	17.6105	4.90357	64.6199	8.77886	4.08721
																					2070	17.6122	4.90407	64.6164	8.77971	4.08761
																					2071	17.6137	4.90449	64.6133	8.78049	4.08794
																					2072	17.6154	4.90495	64.6101	8.78128	4.08831
																					2073	17.6169	4.90537	64.6069	8.78208	4.08868
																					2074	17.6183	4.90578	64.6042	8.78278	4.089
																					2075	17.6198	4.90616	64.6012	8.78349	4.08934
																					2076	17.6211	4.90657	64.5984	8.78416	4.08966
																					2077	17.6224	4.9069	64.596	8.78479	4.08995
																					2078	17.6237	4.90727	64.5934	8.7854	4.09025
																					2079	17.6249	4.90759	64.591	8.78604	4.09053
																					2080	17.6259	4.90787	64.5888	8.78659	4.09079
																					2081	17.627	4.9082	64.5866	8.78712	4.09105
																					2082	17.6281	4.90847	64.5845	8.78763	4.09129
																					2083	17.629	4.90876	64.5827	8.78809	4.09151
																					2084	17.63	4.90899	64.5808	8.78854	4.09173
																					2085	17.6308	4.90926	64.579	8.78901	4.09194
																					2086	17.6316	4.90945	64.5775	8.78934	4.09206
																					2087	17.6323	4.9097	64.576	8.78977	4.09223
																					2088	17.6331	4.90986	64.5746	8.79009	4.09248
																					2089	17.6336	4.91008	64.5733	8.79041	4.09255
																					2090	17.6343	4.9102	64.5722	8.79068	4.09269
																					2091	17.6348	4.9104	64.571	8.791	4.0928
																					2092	17.6352	4.91049	64.5702	8.79115	4.09293
																					2093	17.6356	4.91054	64.5694	8.79144	4.09303
																					2094	17.6361	4.9107	64.5686	8.79155	4.0931
																					2095	17.6364	4.91072	64.5679	8.79175	4.09321
																					2096	17.6366	4.9109	64.5674	8.79178	4.09327
																					2097	17.6367	4.91079	64.5671	8.79205	4.09332
																					2098	17.6368	4.9111	64.5667	8.79183	4.09347
																					2099	17.6365	4.91077	64.5668	8.79224	4.09362
																					2100	17.6304	4.91829	64.5663	8.78378	4.08548

## Sheet: oGHG
	JR 2x	JR 2x	JR 2x	Original	Original	Original	Original	Original		RCP45	RCP6	RCP85	JR base	JR base	Original	RCP6	RCP85	RCP3	RCP3	RCP3	RCP3 conc	JR base	RCP3	RCP3	RCP3	RCP45	RCP85
RCP 3 emissions	Ozone Depleting Substances controlled under the Montreal Protocol (CFCs, HFCFC, Halons, CCl4, MCF, CH3Br, CH3Cl)	N20	Flourinated gases controlled under the Kyoto Protocol, (HFCs, PFCs, SF6)	Ozone Depleting Substances controlled under the Montreal Protocol (CFCs, HFCFC, Halons, CCl4, MCF, CH3Br, CH3Cl)	conc rcp3		N20 RCP 45	N2O RCP6	N2O RCP85	Ozone Depleting Substances controlled under the Montreal Protocol (CFCs, HFCFC, Halons, CCl4, MCF, CH3Br, CH3Cl)			Flourinated gases controlled under the Kyoto Protocol, (HFCs, PFCs, SF6)	Ozone Depleting Substances controlled under the Montreal Protocol (CFCs, HFCFC, Halons, CCl4, MCF, CH3Br, CH3Cl)	conc RCP45	Flourinated gases controlled under the Kyoto Protocol, (HFCs, PFCs, SF6)		RF	N2O emi	Ozone Depleting Substances controlled under the Montreal Protocol (CFCs, HFCFC, Halons, CCl4, MCF, CH3Br, CH3Cl) RF	Flourinated gases controlled under the Kyoto Protocol, (HFCs, PFCs, SF6)	N20 emi	N2O conc	Flourinated gases controlled under the Kyoto Protocol, (HFCs, PFCs, SF6) EMI	N2O RF	Flourinated gases controlled under the Kyoto Protocol, (HFCs, PFCs, SF6) EMI	Flourinated gases controlled under the Kyoto Protocol, (HFCs, PFCs, SF6) EMI
1850	1.395	0.421504	0.0103505	1.395	0		0.421504	0.421504	0.421504	1.395	1.395	1.395	0.0103505	1.395	0	0.0103505	0.0103505	0	0.421504	0	0	0.421504	275.4	0.0103505	0.00675215	0.0103505	0.0103505
1851	1.447	0.427401	0.0103509	1.447	0		0.427401	0.427401	0.427401	1.447	1.447	1.447	0.0103509	1.447	0	0.0103509	0.0103509	0	0.427401	0	0	0.427401	275.425	0.0103509	0.00689231	0.0103509	0.0103509
1852	1.502	0.464661	0.0103513	1.502	0.0105361		0.464661	0.464661	0.464661	1.502	1.502	1.502	0.0103513	1.502	0.0105361	0.0103513	0.0103513	0	0.464661	0	0	0.464661	275.5	0.0103513	0.00703549	0.0103513	0.0103513
1853	1.554	0.464774	0.0103518	1.554	0.0316002		0.464774	0.464774	0.464774	1.554	1.554	1.554	0.0103518	1.554	0.0316002	0.0103518	0.0103518	0	0.464774	0	0	0.464774	275.6	0.0103518	0.00718177	0.0103518	0.0103518
1854	1.607	0.464436	0.0103522	1.607	0.0526703		0.464436	0.464436	0.464436	1.607	1.607	1.607	0.0103522	1.607	0.0526703	0.0103522	0.0103522	0	0.464436	0	0	0.464436	275.7	0.0103522	0.0073313	0.0103522	0.0103522
1855	1.657	0.463279	0.0103526	1.657	0.0737547		0.463279	0.463279	0.463279	1.657	1.657	1.657	0.0103526	1.657	0.0737547	0.0103526	0.0103526	0	0.463279	0	0	0.463279	275.8	0.0103526	0.00748419	0.0103526	0.0103526
1856	1.712	0.467293	0.0103531	1.712	0.0948391		0.467293	0.467293	0.467293	1.712	1.712	1.712	0.0103531	1.712	0.0948391	0.0103531	0.0103531	0	0.467293	0	0	0.467293	275.9	0.0103531	0.00764044	0.0103531	0.0103531
1857	1.765	0.471264	0.0103535	1.765	0.115903		0.471264	0.471264	0.471264	1.765	1.765	1.765	0.0103535	1.765	0.115903	0.0103535	0.0103535	0	0.471264	0	0	0.471264	276	0.0103535	0.00780001	0.0103535	0.0103535
1858	1.815	0.475031	0.0103539	1.815	0.136967		0.475031	0.475031	0.475031	1.815	1.815	1.815	0.0103539	1.815	0.136967	0.0103539	0.0103539	0	0.475031	0	0	0.475031	276.1	0.0103539	0.00796301	0.0103539	0.0103539
1859	1.87	0.478766	0.0103544	1.87	0.158052		0.478766	0.478766	0.478766	1.87	1.87	1.87	0.0103544	1.87	0.158052	0.0103544	0.0103544	0	0.478766	0	0	0.478766	276.2	0.0103544	0.0081296	0.0103544	0.0103544
1860	1.923	0.482577	0.0103548	1.923	0.179116		0.482577	0.482577	0.482577	1.923	1.923	1.923	0.0103548	1.923	0.179116	0.0103548	0.0103548	0	0.482577	0	0	0.482577	276.3	0.0103548	0.0082999	0.0103548	0.0103548
1861	1.973	0.504995	0.010355	1.973	0.20018		0.504995	0.504995	0.504995	1.973	1.973	1.973	0.010355	1.973	0.20018	0.010355	0.010355	0	0.504995	0	0	0.504995	276.4	0.010355	0.00847385	0.010355	0.010355
1862	2.028	0.471113	0.0103551	2.028	0.221264		0.471113	0.471113	0.471113	2.028	2.028	2.028	0.0103551	2.028	0.221264	0.0103551	0.0103551	0	0.471113	0	0	0.471113	276.5	0.0103551	0.00865206	0.0103551	0.0103551
1863	2.081	0.474449	0.0103553	2.081	0.242328		0.474449	0.474449	0.474449	2.081	2.081	2.081	0.0103553	2.081	0.242328	0.0103553	0.0103553	0	0.474449	0	0	0.474449	276.6	0.0103553	0.00884589	0.0103553	0.0103553
1864	2.134	0.477858	0.0103555	2.134	0.263392		0.477858	0.477858	0.477858	2.134	2.134	2.134	0.0103555	2.134	0.263392	0.0103555	0.0103555	0	0.477858	0	0	0.477858	276.7	0.0103555	0.00907048	0.0103555	0.0103555
1865	2.184	0.48145	0.0103556	2.184	0.284477		0.48145	0.48145	0.48145	2.184	2.184	2.184	0.0103556	2.184	0.284477	0.0103556	0.0103556	0	0.48145	0	0	0.48145	276.8	0.0103556	0.00931265	0.0103556	0.0103556
1866	2.239	0.484205	0.0103558	2.239	0.305561		0.484205	0.484205	0.484205	2.239	2.239	2.239	0.0103558	2.239	0.305561	0.0103558	0.0103558	0	0.484205	0	0	0.484205	276.9	0.0103558	0.00953103	0.0103558	0.0103558
1867	2.291	0.484723	0.010356	2.291	0.326625		0.484723	0.484723	0.484723	2.291	2.291	2.291	0.010356	2.291	0.326625	0.010356	0.010356	0	0.484723	0	0	0.484723	277	0.010356	0.00967897	0.010356	0.010356
1868	2.341	0.485953	0.0103561	2.341	0.347689		0.485953	0.485953	0.485953	2.341	2.341	2.341	0.0103561	2.341	0.347689	0.0103561	0.0103561	0	0.485953	0	0	0.485953	277.1	0.0103561	0.00974026	0.0103561	0.0103561
1869	2.386	0.486862	0.0103563	2.386	0.368773		0.486862	0.486862	0.486862	2.386	2.386	2.386	0.0103563	2.386	0.368773	0.0103563	0.0103563	0	0.486862	0	0	0.486862	277.2	0.0103563	0.00975013	0.0103563	0.0103563
1870	2.452	0.487744	0.0103565	2.452	0.389838		0.487744	0.487744	0.487744	2.452	2.452	2.452	0.0103565	2.452	0.389838	0.0103565	0.0103565	0	0.487744	0	0	0.487744	277.3	0.0103565	0.00974841	0.0103565	0.0103565
1871	2.505	0.585016	0.0103569	2.505	0.41082		0.585016	0.585016	0.585016	2.505	2.505	2.505	0.0103569	2.505	0.41082	0.0103569	0.0103569	0	0.585016	0	0	0.585016	277.375	0.0103569	0.00974679	0.0103569	0.0103569
1872	2.557	0.66674	0.0103573	2.557	0.431844		0.66674	0.66674	0.66674	2.557	2.557	2.557	0.0103573	2.557	0.431844	0.0103573	0.0103573	0	0.66674	0	0	0.66674	277.425	0.0103573	0.00983124	0.0103573	0.0103573
1873	2.61	0.696371	0.0103577	2.61	0.452969		0.696371	0.696371	0.696371	2.61	2.61	2.61	0.0103577	2.61	0.452969	0.0103577	0.0103577	0	0.696371	3.37155e-06	0	0.696371	277.5	0.0103577	0.010087	0.0103577	0.0103577
1874	2.663	0.70875	0.0103581	2.663	0.474094		0.70875	0.70875	0.70875	2.663	2.663	2.663	0.0103581	2.663	0.474094	0.0103581	0.0103581	0	0.70875	1.0112e-05	0	0.70875	277.6	0.0103581	0.0104282	0.0103581	0.0103581
1875	2.85	0.720343	0.0103585	2.85	0.495219		0.720343	0.720343	0.720343	2.85	2.85	2.85	0.0103585	2.85	0.495219	0.0103585	0.0103585	0	0.720343	1.68545e-05	0	0.720343	277.7	0.0103585	0.0107693	0.0103585	0.0103585
1876	2.989	0.745243	0.0103589	2.989	0.516344		0.745243	0.745243	0.745243	2.989	2.989	2.989	0.0103589	2.989	0.516344	0.0103589	0.0103589	0	0.745243	2.36015e-05	0	0.745243	277.775	0.0103589	0.0111104	0.0103589	0.0103589
1877	3.13	0.756332	0.0103593	3.13	0.538484		0.756332	0.756332	0.756332	3.13	3.13	3.13	0.0103593	3.13	0.538484	0.0103593	0.0103593	0	0.756332	3.03485e-05	0	0.756332	277.825	0.0103593	0.0114514	0.0103593	0.0103593
1878	3.275	0.766046	0.0103597	3.275	0.56225		0.766046	0.766046	0.766046	3.275	3.275	3.275	0.0103597	3.275	0.56225	0.0103597	0.0103597	0	0.766046	3.7089e-05	0	0.766046	277.9	0.0103597	0.0117924	0.0103597	0.0103597
1879	3.396	0.774911	0.0103602	3.396	0.587234		0.774911	0.774911	0.774911	3.396	3.396	3.396	0.0103602	3.396	0.587234	0.0103602	0.0103602	0	0.774911	4.38295e-05	0	0.774911	278	0.0103602	0.0121333	0.0103602	0.0103602
1880	3.573	0.784121	0.0103606	3.573	0.613437		0.784121	0.784121	0.784121	3.573	3.573	3.573	0.0103606	3.573	0.613437	0.0103606	0.0103606	0	0.784121	5.05765e-05	0	0.784121	278.1	0.0103606	0.0124741	0.0103606	0.0103606
1881	3.726	0.811578	0.0103613	3.726	0.640656		0.811578	0.811578	0.811578	3.726	3.726	3.726	0.0103613	3.726	0.640656	0.0103613	0.0103613	0	0.811578	5.7317e-05	0	0.811578	278.2	0.0103613	0.0128149	0.0103613	0.0103613
1882	3.883	0.78526	0.010362	3.883	0.669094		0.78526	0.78526	0.78526	3.883	3.883	3.883	0.010362	3.883	0.669094	0.010362	0.010362	0	0.78526	6.40575e-05	0	0.78526	278.3	0.010362	0.0131556	0.010362	0.010362
1883	4.043	0.792556	0.0103627	4.043	0.698953		0.792556	0.792556	0.792556	4.043	4.043	4.043	0.0103627	4.043	0.698953	0.0103627	0.0103627	0	0.792556	7.08045e-05	0	0.792556	278.4	0.0103627	0.0134962	0.0103627	0.0103627
1884	4.233	0.798751	0.0103634	4.233	0.730031		0.798751	0.798751	0.798751	4.233	4.233	4.233	0.0103634	4.233	0.730031	0.0103634	0.0103634	0	0.798751	7.7545e-05	0	0.798751	278.5	0.0103634	0.0138368	0.0103634	0.0103634
1885	4.427	0.804534	0.0103642	4.427	0.762328		0.804534	0.804534	0.804534	4.427	4.427	4.427	0.0103642	4.427	0.762328	0.0103642	0.0103642	0	0.804534	8.42855e-05	0	0.804534	278.6	0.0103642	0.0141773	0.0103642	0.0103642
1886	4.625	0.826194	0.0103649	4.625	0.796047		0.826194	0.826194	0.826194	4.625	4.625	4.625	0.0103649	4.625	0.796047	0.0103649	0.0103649	0	0.826194	9.10325e-05	0	0.826194	278.7	0.0103649	0.0145178	0.0103649	0.0103649
1887	4.827	0.832196	0.0103656	4.827	0.831391		0.832196	0.832196	0.832196	4.827	4.827	4.827	0.0103656	4.827	0.831391	0.0103656	0.0103656	0	0.832196	9.77795e-05	0	0.832196	278.8	0.0103656	0.0148582	0.0103656	0.0103656
1888	5.033	0.837058	0.0103663	5.033	0.868359		0.837058	0.837058	0.837058	5.033	5.033	5.033	0.0103663	5.033	0.868359	0.0103663	0.0103663	0	0.837058	0.00010452	0	0.837058	278.875	0.0103663	0.0151985	0.0103663	0.0103663
1889	5.27	0.84144	0.010367	5.27	0.906953		0.84144	0.84144	0.84144	5.27	5.27	5.27	0.010367	5.27	0.906953	0.010367	0.010367	0	0.84144	0.00011126	0	0.84144	278.925	0.010367	0.0155388	0.010367	0.010367
1890	5.485	0.845525	0.0103678	5.485	0.947172		0.845525	0.845525	0.845525	5.485	5.485	5.485	0.0103678	5.485	0.947172	0.0103678	0.0103678	0	0.845525	0.000118008	0	0.845525	279	0.0103678	0.015879	0.0103678	0.0103678
1891	5.731	0.850982	0.0103687	5.731	0.989219		0.850982	0.850982	0.850982	5.731	5.731	5.731	0.0103687	5.731	0.989219	0.0103687	0.0103687	0	0.850982	0.000124748	0	0.850982	279.1	0.0103687	0.0162191	0.0103687	0.0103687
1892	6.01	0.85742	0.0103697	6.01	1.03309		0.85742	0.85742	0.85742	6.01	6.01	6.01	0.0103697	6.01	1.03309	0.0103697	0.0103697	0	0.85742	0.000131463	0	0.85742	279.2	0.0103697	0.0164742	0.0103697	0.0103697
1893	6.267	0.864758	0.0103706	6.267	1.0788		0.864758	0.864758	0.864758	6.267	6.267	6.267	0.0103706	6.267	1.0788	0.0103706	0.0103706	0	0.864758	0.00013819	0	0.864758	279.3	0.0103706	0.0166442	0.0103706	0.0103706
1894	6.529	0.872945	0.0103716	6.529	1.12673		0.872945	0.872945	0.872945	6.529	6.529	6.529	0.0103716	6.529	1.12673	0.0103716	0.0103716	0	0.872945	0.00014495	0	0.872945	279.375	0.0103716	0.0168992	0.0103716	0.0103716
1895	6.824	0.881882	0.0103726	6.824	1.17691		0.881882	0.881882	0.881882	6.824	6.824	6.824	0.0103726	6.824	1.17691	0.0103726	0.0103726	0	0.881882	0.00015171	0	0.881882	279.425	0.0103726	0.0172392	0.0103726	0.0103726
1896	7.151	0.891418	0.0103735	7.151	1.22911		0.891418	0.891418	0.891418	7.151	7.151	7.151	0.0103735	7.151	1.22911	0.0103735	0.0103735	0	0.891418	0.00015847	0	0.891418	279.475	0.0103735	0.017579	0.0103735	0.0103735
1897	7.432	0.901402	0.0103745	7.432	1.28355		0.901402	0.901402	0.901402	7.432	7.432	7.432	0.0103745	7.432	1.28355	0.0103745	0.0103745	0	0.901402	0.00016523	0	0.901402	279.525	0.0103745	0.0178339	0.0103745	0.0103745
1898	7.798	0.911681	0.0103754	7.798	1.34062		0.911681	0.911681	0.911681	7.798	7.798	7.798	0.0103754	7.798	1.34062	0.0103754	0.0103754	0	0.911681	0.000172315	0	0.911681	279.6	0.0103754	0.0180038	0.0103754	0.0103754
1899	8.119	0.922105	0.969495	8.119	1.40014		0.922105	0.922105	0.922105	8.119	8.119	8.119	0.969495	8.119	1.40014	0.969495	0.969495	0	0.922105	0.00017992	0	0.922105	279.675	0.969495	0.0182586	0.969495	0.969495
1900	8.473	0.932522	0.0609532	8.473	1.4623		0.932522	0.932522	0.932522	8.473	8.473	8.473	0.0609532	8.473	1.4623	0.0609532	0.0609532	0	0.932522	0.000187915	0	0.932522	279.725	0.0609532	0.0185984	0.0609532	0.0609532
1901	8.592	0.944667	0.0636175	8.592	1.5273		0.944667	0.944667	0.944667	8.592	8.592	8.592	0.0636175	8.592	1.5273	0.0636175	0.0636175	0	0.944667	0.0001963	0.0329065	0.944667	279.8	0.0636175	0.018938	0.0636175	0.0636175
1902	8.762	0.959931	0.0664218	8.762	1.59494		0.959931	0.959931	0.959931	8.762	8.762	8.762	0.0664218	8.762	1.59494	0.0664218	0.0664218	0	0.959931	0.00020501	0.067545	0.959931	279.9	0.0664218	0.0192776	0.0664218	0.0664218
1903	8.906	0.977647	0.0693737	8.906	1.66359		0.977647	0.977647	0.977647	8.906	8.906	8.906	0.0693737	8.906	1.66359	0.0693737	0.0693737	0	0.977647	0.00021411	0.0711	0.977647	280	0.0693737	0.0196171	0.0693737	0.0693737
1904	9.102	0.997229	0.0724807	9.102	1.73184		0.997229	0.997229	0.997229	9.102	9.102	9.102	0.0724807	9.102	1.73184	0.0724807	0.0724807	0	0.997229	0.000223665	0.0748421	0.997229	280.1	0.0724807	0.0199566	0.0724807	0.0724807
1905	9.623	1.01813	0.0757512	9.623	1.79989		1.01813	1.01813	1.01813	9.623	9.623	9.623	0.0757512	9.623	1.79989	0.0757512	0.0757512	0	1.01813	0.00023361	0.0787812	1.01813	280.2	0.0757512	0.020296	0.0757512	0.0757512
1906	12.093	1.03974	0.0791937	12.093	1.86794		1.03974	1.03974	1.03974	12.093	12.093	12.093	0.0791937	12.093	1.86794	0.0791937	0.0791937	0	1.03974	0.000243945	0.0829275	1.03974	280.3	0.0791937	0.0206353	0.0791937	0.0791937
1907	12.363	1.06146	0.0828172	12.363	1.93883		1.06146	1.06146	1.06146	12.363	12.363	12.363	0.0828172	12.363	1.93883	0.0828172	0.0828172	0	1.06146	0.000254735	0.0872921	1.06146	280.4	0.0828172	0.0209746	0.0828172	0.0828172
1908	12.633	1.08267	0.0866313	12.633	2.02962		1.08267	1.08267	1.08267	12.633	12.633	12.633	0.0866313	12.633	2.02962	0.0866313	0.0866313	0	1.08267	0.000266045	0.0918865	1.08267	280.525	0.0866313	0.0213138	0.0866313	0.0866313
1909	12.903	1.10278	0.0906461	12.903	2.13769		1.10278	1.10278	1.10278	12.903	12.903	12.903	0.0906461	12.903	2.13769	0.0906461	0.0906461	0	1.10278	0.000277875	0.0967226	1.10278	280.675	0.0906461	0.0215682	0.0906461	0.0906461
1910	13.146	1.12118	0.094872	13.146	2.24575		1.12118	1.12118	1.12118	13.146	13.146	13.146	0.094872	13.146	2.24575	0.094872	0.094872	0	1.12118	0.000290225	0.101813	1.12118	280.825	0.094872	0.0217377	0.094872	0.094872
1911	14.007	1.13897	0.0993231	14.007	2.35381		1.13897	1.13897	1.13897	14.007	14.007	14.007	0.0993231	14.007	2.35381	0.0993231	0.0993231	0	1.13897	0.000303095	0.107172	1.13897	280.975	0.0993231	0.021992	0.0993231	0.0993231
1912	19.895	1.15756	0.104008	19.895	2.46167		1.15756	1.15756	1.15756	19.895	19.895	19.895	0.104008	19.895	2.46167	0.104008	0.104008	0	1.15756	0.00031655	0.112812	1.15756	281.125	0.104008	0.022331	0.104008	0.104008
1913	19.025	1.17675	0.10894	19.025	2.5738		1.17675	1.17675	1.17675	19.025	19.025	19.025	0.10894	19.025	2.5738	0.10894	0.10894	0	1.17675	0.00033059	0.11875	1.17675	281.3	0.10894	0.02267	0.10894	0.10894
1914	11.082	1.19626	0.11413	11.082	2.73306		1.19626	1.19626	1.19626	11.082	11.082	11.082	0.11413	11.082	2.73306	0.11413	0.11413	0	1.19626	0.000345215	0.125	1.19626	281.475	0.11413	0.0230089	0.11413	0.11413
1915	11.216	1.21584	0.119594	11.216	2.92466		1.21584	1.21584	1.21584	11.216	11.216	11.216	0.119594	11.216	2.92466	0.119594	0.119594	0	1.21584	0.000360555	0.131579	1.21584	281.625	0.119594	0.0232631	0.119594	0.119594
1916	18.614	1.23532	0.125345	18.614	3.04253		1.23532	1.23532	1.23532	18.614	18.614	18.614	0.125345	18.614	3.04253	0.125345	0.125345	0	1.23532	0.00037661	0.138504	1.23532	281.8	0.125345	0.0234325	0.125345	0.125345
1917	22.143	1.25452	0.131398	22.143	3.09705		1.25452	1.25452	1.25452	22.143	22.143	22.143	0.131398	22.143	3.09705	0.131398	0.131398	0	1.25452	0.000393315	0.145794	1.25452	282	0.131398	0.0236019	0.131398	0.131398
1918	22.696	1.27326	0.13777	22.696	3.20642		1.27326	1.27326	1.27326	22.696	22.696	22.696	0.13777	22.696	3.20642	0.13777	0.13777	0	1.27326	0.000410735	0.153467	1.27326	282.225	0.13777	0.0237712	0.13777	0.13777
1919	23.196	1.29138	0.144476	23.196	3.3942		1.29138	1.29138	1.29138	23.196	23.196	23.196	0.144476	23.196	3.3942	0.144476	0.144476	0	1.29138	0.000429	0.161544	1.29138	282.475	0.144476	0.0240253	0.144476	0.144476
1920	23.802	1.30869	0.151536	23.802	3.60575		1.30869	1.30869	1.30869	23.802	23.802	23.802	0.151536	23.802	3.60575	0.151536	0.151536	0	1.30869	0.000448045	0.170047	1.30869	282.7	0.151536	0.0242793	0.151536	0.151536
1921	24.304	1.32579	0.158959	24.304	3.8173		1.32579	1.32579	1.32579	24.304	24.304	24.304	0.158959	24.304	3.8173	0.158959	0.158959	0	1.32579	0.000467935	0.178997	1.32579	282.925	0.158959	0.0244486	0.158959	0.158959
1922	24.563	1.34327	1.1405	24.563	4.02925		1.34327	1.34327	1.34327	24.563	24.563	24.563	1.1405	24.563	4.02925	1.1405	1.1405	5.26505e-06	1.34327	0.000488735	0.188417	1.34327	283.175	1.1405	0.0247025	1.1405	1.1405
1923	25.35	1.36094	1.32944	25.35	4.24161		1.36094	1.36094	1.36094	25.35	25.35	25.35	1.32944	25.35	4.24161	1.32944	1.32944	1.08072e-05	1.36094	0.00051038	0.198334	1.36094	283.4	1.32944	0.025041	1.32944	1.32944
1924	25.878	1.37962	1.39888	25.878	4.45175		1.37962	1.37962	1.37962	25.878	25.878	25.878	1.39888	25.878	4.45175	1.39888	1.39888	1.1376e-05	1.37962	0.00053235	0.229097	1.37962	283.6	1.39888	0.0253795	1.39888	1.39888
1925	28.827	1.3999	1.47197	28.827	4.66191		1.3999	1.3999	1.3999	28.827	28.827	28.827	1.47197	28.827	4.66191	1.47197	1.47197	1.19747e-05	1.3999	0.00055419	0.284506	1.3999	283.8	1.47197	0.0257179	1.47197	1.47197
1926	29.446	1.42119	1.54891	29.446	4.87408		1.42119	1.42119	1.42119	29.446	29.446	29.446	1.54891	29.446	4.87408	1.54891	1.54891	1.2605e-05	1.42119	0.000575965	0.345533	1.42119	284	1.54891	0.0260563	1.54891	1.54891
1927	30.065	1.44292	1.62991	30.065	5.10453		1.44292	1.44292	1.44292	30.065	30.065	30.065	1.62991	30.065	5.10453	1.62991	1.62991	1.32684e-05	1.44292	0.00059774	0.409771	1.44292	284.225	1.62991	0.0263946	1.62991	1.62991
1928	30.685	1.4645	1.71516	30.685	5.35328		1.4645	1.4645	1.4645	30.685	30.685	30.685	1.71516	30.685	5.35328	1.71516	1.71516	1.39667e-05	1.4645	0.000620425	0.477391	1.4645	284.45	1.71516	0.0267328	1.71516	1.71516
1929	31.573	1.48535	1.80491	31.573	5.60205		1.48535	1.48535	1.48535	31.573	31.573	31.573	1.80491	31.573	5.60205	1.80491	1.80491	1.47018e-05	1.48535	0.00064948	0.548569	1.48535	284.625	1.80491	0.0271555	1.80491	1.80491
1930	31.933	1.50489	2.64619	31.933	5.85081		1.50489	1.50489	1.50489	31.933	31.933	31.933	2.64619	31.933	5.85081	2.64619	2.64619	1.54756e-05	1.50489	0.00068406	0.623494	1.50489	284.8	2.64619	0.0276626	2.64619	2.64619
1931	32.65	1.52262	2.0665	32.65	6.10161		1.52262	1.52262	1.52262	32.65	32.65	32.65	2.0665	32.65	6.10161	2.0665	2.0665	1.62901e-05	1.52262	0.00071864	0.702362	1.52262	284.975	2.0665	0.0281696	2.0665	2.0665
1932	34.076	1.53852	2.17706	34.076	6.35241		1.53852	1.53852	1.53852	34.076	34.076	34.076	2.17706	34.076	6.35241	2.17706	2.17706	1.71475e-05	1.53852	0.00075322	0.823121	1.53852	285.125	2.17706	0.0286764	2.17706	2.17706
1933	41.99	1.55267	2.29364	41.99	6.6036		1.55267	1.55267	1.55267	41.99	41.99	41.99	2.29364	41.99	6.6036	2.29364	2.29364	1.805e-05	1.55267	0.000787735	0.951532	1.55267	285.3	2.29364	0.0291831	2.29364	2.29364
1934	43.128	1.56531	2.41658	43.128	6.8633		1.56531	1.56531	1.56531	43.128	43.128	43.128	2.41658	43.128	6.8633	2.41658	2.41658	1.9e-05	1.56531	0.000823615	1.05037	1.56531	285.5	2.41658	0.029774	2.41658	2.41658
1935	44.148	1.57712	2.54622	44.148	7.18389		1.57712	1.57712	1.57712	44.148	44.148	44.148	2.54622	44.148	7.18389	2.54622	2.54622	2e-05	1.57712	0.000874445	1.15464	1.57712	285.7	2.54622	0.0303648	2.54622	2.54622
1936	45.266	1.58892	2.68295	45.266	7.56373		1.58892	1.58892	1.58892	45.266	45.266	45.266	2.68295	45.266	7.56373	2.68295	2.68295	2.10526e-05	1.58892	0.00093548	1.26466	1.58892	285.9	2.68295	0.0308711	2.68295	2.68295
1937	46.598	1.60151	2.82716	46.598	7.95036		1.60151	1.60151	1.60151	46.598	46.598	46.598	2.82716	46.598	7.95036	2.82716	2.82716	2.21607e-05	1.60151	0.00097292	1.38075	1.60151	286.1	2.82716	0.0314615	2.82716	2.82716
1938	48.236	1.61572	2.97926	48.236	8.34413		1.61572	1.61572	1.61572	48.236	48.236	48.236	2.97926	48.236	8.34413	2.97926	2.97926	2.3327e-05	1.61572	0.00099008	1.50324	1.61572	286.275	2.97926	0.0321361	2.97926	2.97926
1939	49.927	1.63235	3.1397	49.927	8.75517		1.63235	1.63235	1.63235	49.927	49.927	49.927	3.1397	49.927	8.75517	3.1397	3.1397	2.45547e-05	1.63235	0.00102479	1.63252	1.63235	286.425	3.1397	0.0328947	3.1397	3.1397
1940	54.137	1.65224	3.30895	54.137	9.1942		1.65224	1.65224	1.65224	54.137	54.137	54.137	3.30895	54.137	9.1942	3.30895	3.30895	2.58471e-05	1.65224	0.00108459	1.76895	1.65224	286.575	3.30895	0.0337372	3.30895	3.30895
1941	56.92	1.7002	3.4875	56.92	9.66556		1.7002	1.7002	1.7002	56.92	56.92	56.92	3.4875	56.92	9.66556	3.4875	3.4875	2.72075e-05	1.7002	0.001152	1.91295	1.7002	286.725	3.4875	0.0344951	3.4875	3.4875
1942	59.313	1.79386	3.6345	59.313	10.191		1.79386	1.79386	1.79386	59.313	59.313	59.313	3.6345	59.313	10.191	3.6345	3.6345	2.86395e-05	1.79386	0.0012194	2.06495	1.79386	286.9	3.6345	0.0352528	3.6345	3.6345
1943	61.553	1.92316	3.79395	61.553	10.7811		1.92316	1.92316	1.92316	61.553	61.553	61.553	3.79395	61.553	10.7811	3.79395	3.79395	3.01468e-05	1.92316	0.00128693	2.22541	1.92316	287.1	3.79395	0.0360942	3.79395	3.79395
1944	64.667	2.08668	3.96527	64.667	11.4233		2.08668	2.08668	2.08668	64.667	64.667	64.667	3.96527	64.667	11.4233	3.96527	3.96527	3.17335e-05	2.08668	0.0013546	2.3934	2.08668	287.3	3.96527	0.0368512	3.96527	3.96527
1945	72.09	2.2804	4.14903	72.09	12.1183		2.2804	2.2804	2.2804	72.09	72.09	72.09	4.14903	72.09	12.1183	4.14903	4.14903	3.66556e-05	2.2804	0.00142155	2.56807	2.2804	287.525	4.14903	0.0375238	4.14903	4.14903
1946	85.644	2.49036	4.34581	85.644	12.8871		2.49036	2.49036	2.49036	85.644	85.644	85.644	4.34581	85.644	12.8871	4.34581	4.34581	4.5521e-05	2.49036	0.0014885	2.75008	2.49036	287.775	4.34581	0.0381962	4.34581	4.34581
1947	103.724	2.7026	4.55624	103.724	13.8202		2.7026	2.7026	2.7026	103.724	103.724	103.724	4.55624	103.724	13.8202	4.55624	4.55624	5.52852e-05	2.7026	0.0015561	2.94006	2.7026	288.025	4.55624	0.0388684	4.55624	4.55624
1948	111.27	2.90316	4.78098	111.27	15.1102		2.90316	2.90316	2.90316	111.27	111.27	111.27	4.78098	111.27	15.1102	4.78098	4.78098	6.55634e-05	2.90316	0.00162955	3.13868	2.90316	288.275	4.78098	0.0396242	4.78098	4.78098
1949	122.503	3.07807	5.02074	122.503	16.9117		3.07807	3.07807	3.07807	122.503	122.503	122.503	5.02074	122.503	16.9117	5.02074	5.02074	7.63825e-05	3.07807	0.00170885	3.34665	3.07807	288.525	5.02074	0.0403798	5.02074	5.02074
1950	120.63	3.21338	5.53817	120.63	19.1118		3.21338	3.21338	3.21338	120.63	120.63	120.63	5.53817	120.63	19.1118	5.53817	5.53817	8.77711e-05	3.21338	0.00178815	3.5647	3.21338	288.775	5.53817	0.0409673	5.53817	5.53817
1951	118.316	3.3186	5.8103	118.316	21.7426		3.3186	3.3186	3.3186	118.316	118.316	118.316	5.8103	118.316	21.7426	5.8103	5.8103	9.9759e-05	3.3186	0.00186745	3.79359	3.3186	289	5.8103	0.0415546	5.8103	5.8103
1952	128.847	3.41111	6.09982	128.847	24.5705		3.41111	3.41111	3.41111	128.847	128.847	128.847	6.09982	128.847	24.5705	6.09982	6.09982	0.000112378	3.41111	0.0019474	4.0504	3.41111	289.2	6.09982	0.0421417	6.09982	6.09982
1953	143.078	3.48872	6.40762	143.078	27.235		3.48872	3.48872	3.48872	143.078	143.078	143.078	6.40762	143.078	27.235	6.40762	6.40762	0.000131699	3.48872	0.00202735	4.33597	3.48872	289.425	6.40762	0.0426447	6.40762	6.40762
1954	158.896	3.55435	6.73465	158.896	29.9757		3.55435	3.55435	3.55435	158.896	158.896	158.896	6.73465	158.896	29.9757	6.73465	6.73465	0.000152245	3.55435	0.00210743	4.63495	3.55435	289.675	6.73465	0.0432315	6.73465	6.73465
1955	177.054	3.61411	7.0819	177.054	33.0609		3.61411	3.61411	3.61411	177.054	177.054	177.054	7.0819	177.054	33.0609	7.0819	7.0819	0.000168059	3.61411	0.00219022	4.94829	3.61411	289.9	7.0819	0.0439018	7.0819	7.0819
1956	200.085	3.67068	7.45044	200.085	36.6113		3.67068	3.67068	3.67068	200.085	200.085	200.085	7.45044	200.085	36.6113	7.45044	7.45044	0.000184743	3.67068	0.0022925	5.27698	3.67068	290.125	7.45044	0.0445719	7.45044	7.45044
1957	221.261	3.72673	7.84139	221.261	40.6989		3.72673	3.72673	3.72673	221.261	221.261	221.261	7.84139	221.261	40.6989	7.84139	7.84139	0.000202346	3.72673	0.00241373	5.62208	3.72673	290.375	7.84139	0.0452418	7.84139	7.84139
1958	230.99	3.78495	8.25596	230.99	45.4175		3.78495	3.78495	3.78495	230.99	230.99	230.99	8.25596	230.99	45.4175	8.25596	8.25596	0.000220919	3.78495	0.00253714	5.98468	3.78495	290.6	8.25596	0.0459114	8.25596	8.25596
1959	250.687	3.848	8.69542	250.687	50.7782		3.848	3.848	3.848	250.687	250.687	250.687	8.69542	250.687	50.7782	8.69542	8.69542	0.000240519	3.848	0.00266283	6.36597	3.848	290.825	8.69542	0.0464972	8.69542	8.69542
1960	285.405	3.91858	9.42302	285.405	56.515		3.91858	3.91858	3.91858	285.405	285.405	285.405	9.42302	285.405	56.515	9.42302	9.42302	0.000261202	3.91858	0.00279404	6.76717	3.91858	291.1	9.42302	0.0469991	9.42302	9.42302
1961	318.917	4.02401	9.91652	318.917	62.5823		4.02401	4.02401	4.02401	318.917	318.917	318.917	9.91652	318.917	62.5823	9.91652	9.91652	0.000283032	4.02401	0.00293421	7.18959	4.02401	291.4	9.91652	0.0475009	9.91652	9.91652
1962	364.758	4.18365	10.7011	364.758	69.4618		4.18365	4.18365	4.18365	364.758	364.758	364.758	10.7011	364.758	69.4618	10.7011	10.7011	0.000306072	4.18365	0.00308473	7.65086	4.18365	291.675	10.7011	0.0480025	10.7011	10.7011
1963	413.05	4.38831	16.9814	413.05	77.4216		4.38831	4.38831	4.38831	413.05	413.05	413.05	16.9814	413.05	77.4216	16.9814	16.9814	0.000330392	4.38831	0.00325255	8.15246	4.38831	291.925	16.9814	0.0485876	16.9814	16.9814
1964	465.241	4.63747	15.5977	465.241	86.5951		4.63747	4.63747	4.63747	465.241	465.241	465.241	15.5977	465.241	86.5951	15.5977	15.5977	0.000356066	4.63747	0.00344105	8.69591	4.63747	292.225	15.5977	0.049256	15.5977	15.5977
1965	518.208	4.89682	15.7206	518.208	97.2808		4.89682	4.89682	4.89682	518.208	518.208	518.208	15.7206	518.208	97.2808	15.7206	15.7206	0.000382943	4.89682	0.00364625	9.39162	4.89682	292.6	15.7206	0.0499242	15.7206	15.7206
1966	582.579	5.19558	15.8536	582.579	109.645		5.19558	5.19558	5.19558	582.579	582.579	582.579	15.8536	582.579	109.645	15.8536	15.8536	0.000410891	5.19558	0.00386832	10.184	5.19558	293	15.8536	0.0506757	15.8536	15.8536
1967	659.304	5.45748	16.5213	659.304	123.662		5.45748	5.45748	5.45748	659.304	659.304	659.304	16.5213	659.304	123.662	16.5213	16.5213	0.000440012	5.45748	0.00411399	10.9556	5.45748	293.4	16.5213	0.0515103	16.5213	16.5213
1968	738.519	5.61974	16.1531	738.519	139.328		5.61974	5.61974	5.61974	738.519	738.519	738.519	16.1531	738.519	139.328	16.1531	16.1531	0.000470409	5.61974	0.00441226	11.7388	5.61974	293.8	16.1531	0.0523445	16.1531	16.1531
1969	822.699	5.78483	16.5829	822.699	156.887		5.78483	5.78483	5.78483	822.699	822.699	822.699	16.5829	822.699	156.887	16.5829	16.5829	0.000502189	5.78483	0.00482474	12.5668	5.78483	294.225	16.5829	0.0531784	16.5829	16.5829
1970	891.162	5.93688	15.6789	891.162	176.605		5.93688	5.93688	5.93688	891.162	891.162	891.162	15.6789	891.162	176.605	15.6789	15.6789	0.000535464	5.93688	0.00540089	13.4084	5.93688	294.7	15.6789	0.0540119	15.6789	15.6789
1971	976.044	5.60498	17.6422	976.044	198.618		5.60498	5.60498	5.60498	976.044	976.044	976.044	17.6422	976.044	198.618	17.6422	17.6422	0.000570351	5.60498	0.00610459	14.2482	5.60498	295.2	17.6422	0.054845	17.6422	17.6422
1972	1095.3	5.91813	17.5999	1095.3	222.885		5.91813	5.91813	5.91813	1095.3	1095.3	1095.3	17.5999	1095.3	222.885	17.5999	17.5999	0.000606975	5.91813	0.00694611	15.1011	5.91813	295.7	17.5999	0.0555945	17.5999	17.5999
1973	1240.89	6.0449	18.098	1240.89	249.194		6.0449	6.0449	6.0449	1240.89	1240.89	1240.89	18.098	1240.89	249.194	18.098	18.098	0.000648064	6.0449	0.0078507	15.9994	6.0449	296.225	18.098	0.0562605	18.098	18.098
1974	1354.74	5.9406	16.8548	1354.74	277.927		5.9406	5.9406	5.9406	1354.74	1354.74	1354.74	16.8548	1354.74	277.927	16.8548	16.8548	0.000693755	5.9406	0.008703	16.9475	5.9406	296.8	16.8548	0.0570094	16.8548	16.8548
1975	1351.83	6.14097	18.625	1351.83	309.889		6.14097	6.14097	6.14097	1351.83	1351.83	1351.83	18.625	1351.83	309.889	18.625	18.625	0.000741592	6.14097	0.00957968	17.9154	6.14097	297.4	18.625	0.0578412	18.625	18.625
1976	1438.92	6.30426	19.4425	1438.92	344.976		6.30426	6.30426	6.30426	1438.92	1438.92	1438.92	19.4425	1438.92	344.976	19.4425	19.4425	0.000791727	6.30426	0.0105666	18.8898	6.30426	298	19.4425	0.0585896	19.4425	19.4425
1977	1510.43	6.5344	18.9537	1510.43	380.802		6.5344	6.5344	6.5344	1510.43	1510.43	1510.43	18.9537	1510.43	380.802	18.9537	18.9537	0.000844317	6.5344	0.0116944	19.8874	6.5344	298.65	18.9537	0.0593376	18.9537	18.9537
1978	1686.48	6.61937	20.9159	1686.48	416.056		6.61937	6.61937	6.61937	1686.48	1686.48	1686.48	20.9159	1686.48	416.056	20.9159	20.9159	0.000899532	6.61937	0.0129787	20.9739	6.61937	299.36	20.9159	0.0601684	20.9159	20.9159
1979	1457.13	7.00777	20.2365	1457.13	451.017		7.00777	7.00777	7.00777	1457.13	1457.13	1457.13	20.2365	1457.13	451.017	20.2365	20.2365	0.000957549	7.00777	0.0144558	22.1267	7.00777	300.082	20.2365	0.0609158	20.2365	20.2365
1980	1638.39	7.06139	22.9501	1638.39	486.546		7.06139	7.06139	7.06139	1638.39	1638.39	1638.39	22.9501	1638.39	486.546	22.9501	22.9501	0.00101855	7.06139	0.0161359	23.3668	7.06139	300.74	22.9501	0.0616629	22.9501	22.9501
1981	1532.3	6.84175	22.074	1532.3	519.303		6.84175	6.84175	6.84175	1532.3	1532.3	1532.3	22.074	1532.3	519.303	22.074	22.074	0.00108275	6.84175	0.0179348	24.6879	6.84175	301.382	22.074	0.0625756	22.074	22.074
1982	1539.42	7.11899	23.4422	1539.42	550.904		7.11899	7.11899	7.11899	1539.42	1539.42	1539.42	23.4422	1539.42	550.904	23.4422	23.4422	0.00115033	7.11899	0.0198385	26.102	7.11899	302.22	23.4422	0.0635708	23.4422	23.4422
1983	1677.43	7.2169	23.2237	1677.43	583.135		7.2169	7.2169	7.2169	1677.43	1677.43	1677.43	23.2237	1677.43	583.135	23.2237	23.2237	0.00122414	7.2169	0.0220016	27.595	7.2169	303.098	23.2237	0.0644827	23.2237	23.2237
1984	1792.07	7.04813	23.4892	1792.07	613.196		7.04813	7.04813	7.04813	1792.07	1792.07	1792.07	23.4892	1792.07	613.196	23.4892	23.4892	0.00130439	7.04813	0.0245114	29.1286	7.04813	303.805	23.4892	0.0653112	23.4892	23.4892
1985	1685.65	7.01692	23.7867	1685.65	644.36		7.01692	7.01692	7.01692	1685.65	1685.65	1685.65	23.7867	1685.65	644.36	23.7867	23.7867	0.00139135	7.01692	0.0274105	30.7215	7.01692	304.397	23.7867	0.0663049	23.7867	23.7867
1986	1939.86	7.07049	26.7277	1939.86	678.379		7.07049	7.07049	7.07049	1939.86	1939.86	1939.86	26.7277	1939.86	678.379	26.7277	26.7277	0.00150266	7.07049	0.030795	32.3442	7.07049	305.087	26.7277	0.0675464	26.7277	26.7277
1987	2064.68	7.46167	26.1138	2064.68	712.084		7.46167	7.46167	7.46167	2064.68	2064.68	2064.68	26.1138	2064.68	712.084	26.1138	26.1138	0.00162943	7.46167	0.0347191	34.0163	7.46167	305.772	26.1138	0.0688698	26.1138	26.1138
1988	2060.15	7.20251	26.0124	2060.15	748.374		7.20251	7.20251	7.20251	2060.15	2060.15	2060.15	26.0124	2060.15	748.374	26.0124	26.0124	0.0017529	7.20251	0.0391748	35.814	7.20251	306.262	26.0124	0.0701923	26.0124	26.0124
1989	1813.51	7.33104	27.824	1813.51	789.249		7.33104	7.33104	7.33104	1813.51	1813.51	1813.51	27.824	1813.51	789.249	27.824	27.824	0.0018782	7.33104	0.0441604	37.6894	7.33104	307.195	27.824	0.0715138	27.824	27.824
1990	1989.86	7.58568	28.2991	1989.86	830.2		7.58568	7.58568	7.58568	1989.86	1989.86	1989.86	28.2991	1989.86	830.2	28.2991	28.2991	0.00201069	7.58568	0.0497544	39.5645	7.58568	308.507	28.2991	0.0729169	28.2991	28.2991
1991	1607.8	7.40236	30.2933	1607.8	866.564		7.40236	7.40236	7.40236	1607.8	1607.8	1607.8	30.2933	1607.8	866.564	30.2933	30.2933	0.00214534	7.40236	0.0560421	41.5256	7.40236	309.485	30.2933	0.0744839	30.2933	30.2933
1992	1517.42	7.79893	33.3907	1517.42	899.397		7.79893	7.79893	7.79893	1517.42	1517.42	1517.42	33.3907	1517.42	899.397	33.3907	33.3907	0.00227972	7.79893	0.0630668	43.5792	7.79893	310.113	33.3907	0.076132	33.3907	33.3907
1993	1168.94	7.3131	39.3754	1168.94	927.681		7.3131	7.3131	7.3131	1168.94	1168.94	1168.94	39.3754	1168.94	927.681	39.3754	39.3754	0.00241617	7.3131	0.0708154	45.7214	7.3131	310.603	39.3754	0.0777787	39.3754	39.3754
1994	1014.23	7.50728	54.2056	1014.23	948.8		7.50728	7.50728	7.50728	1014.23	1014.23	1014.23	54.2056	1014.23	948.8	54.2056	54.2056	0.00255991	7.50728	0.0792192	48.0312	7.50728	311.077	54.2056	0.0795061	54.2056	54.2056
1995	962.917	7.6191	67.9878	962.917	963.903		7.6191	7.6191	7.6191	962.917	962.917	962.917	67.9878	962.917	963.903	67.9878	67.9878	0.0027116	7.6191	0.0884006	50.6326	7.6191	311.603	67.9878	0.0813963	67.9878	67.9878
1996	795.891	7.65206	81.2674	795.891	973.652		7.65206	7.65206	7.65206	795.891	795.891	795.891	81.2674	795.891	973.652	81.2674	81.2674	0.00286646	7.65206	0.0986174	53.8504	7.65206	312.295	81.2674	0.0833667	81.2674	81.2674
1997	711.038	7.90975	91.8081	711.038	982.03		7.90975	7.90975	7.90975	711.038	711.038	711.038	91.8081	711.038	982.03	91.8081	91.8081	0.00302237	7.90975	0.109836	57.9728	7.90975	313.048	91.8081	0.0853351	91.8081	91.8081
1998	728.513	7.89573	103.682	728.513	988.498		7.89573	7.89573	7.89573	728.513	728.513	728.513	103.682	728.513	988.498	103.682	103.682	0.00318199	7.89573	0.121292	62.9186	7.89573	313.76	103.682	0.0874652	103.682	103.682
1999	680.544	7.52698	113.371	680.544	992.182		7.52698	7.52698	7.52698	680.544	680.544	680.544	113.371	680.544	992.182	113.371	113.371	0.00335582	7.52698	0.132566	68.4136	7.52698	314.533	113.371	0.0897893	113.371	113.371
2000	677.163	7.4566	144.458	677.163	995.415		7.4566	7.4566	7.4566	677.163	677.163	677.163	144.458	677.163	995.415	144.458	144.458	0.00354027	7.4566	0.143748	74.4061	7.4566	315.257	144.458	0.0921515	144.458	144.458
2001	625.922	7.503	158.931	625.922	998.627		7.503	7.503	7.503	659.353	659.353	659.353	158.931	625.922	998.627	158.931	158.931	0.00373869	7.503	0.155112	80.9399	7.503	315.85	158.931	0.0942987	158.931	158.931
2002	609.698	7.5487	176.526	609.698	1001.03		7.5487	7.5487	7.5487	607.319	607.319	607.319	176.526	609.698	1001.03	176.526	176.526	0.00395006	7.5487	0.16559	88.6304	7.5487	316.488	176.526	0.0963945	176.526	176.526
2003	626.466	7.5942	191.492	626.466	1003.21		7.5942	7.5942	7.5942	616.104	616.104	616.104	191.492	626.466	1003.21	191.492	191.492	0.00417632	7.5942	0.175699	97.4707	7.5942	317.245	191.492	0.0991227	191.492	191.492
2004	605.364	7.6394	210.618	605.364	1004		7.6394	7.6394	7.6394	591.186	591.186	591.186	210.618	605.364	1004	210.618	210.618	0.0044152	7.6394	0.18601	106.775	7.6394	318.017	210.618	0.101978	210.618	210.618
2005	545.23	7.6841	224.991	545.23	1003.93		7.6841	7.6841	7.6841	545.23	545.23	545.23	224.991	545.23	1003.93	224.991	224.991	0.00466057	7.6841	0.195626	116.584	7.6841	318.71	224.991	0.104277	224.991	224.991
2006	557.65	7.715	238.121	557.65	1003.58		7.721	7.7838	7.778	559.779	559.779	559.779	238.121	557.65	1003.58	234.583	246.929	0.00491543	7.715	0.205596	126.769	7.715	319.44	238.121	0.1062	232.428	246.929
2007	564.595	7.7459	259.671	564.595	1001.53		7.7579	7.8838	7.8717	568.026	568.026	568.026	259.671	564.595	1001.53	252.538	277.241	0.00517506	7.7459	0.21648	136.988	7.7459	320.2	259.671	0.108436	248.258	277.241
2008	566.209	7.77663	281.72	566.209	998.531		7.79467	7.98433	7.96537	570.199	570.199	570.199	281.72	566.209	998.531	267.677	306.591	0.0054426	7.77663	0.227264	147.6	7.77663	320.889	281.72	0.110655	259.434	306.591
2009	568.007	7.80737	303.77	568.007	995.689		7.83143	8.08487	8.05903	571.892	571.892	571.892	303.77	568.007	995.689	282.815	335.941	0.00573024	7.80737	0.238875	158.725	7.80737	321.578	303.77	0.11224	270.611	335.941
2010	564.927	7.8381	325.819	564.927	992.533		7.8682	8.1854	8.1527	568.106	568.106	568.106	325.819	564.927	992.619	297.954	365.291	0.0060303	7.8381	0.251953	170.269	7.8381	322.267	325.819	0.115252	281.788	365.291
2011	550.292	7.79063	338.297	550.292	989.06		7.90492	8.15982	8.29296	567.8	567.8	567.8	338.297	550.292	989.315	302.13	389.557	0.00633033	7.79063	0.265056	182.496	7.79063	322.957	338.297	0.119486	294.888	389.557
2012	535.908	7.74316	350.774	535.908	985.495		7.94164	8.13424	8.43322	567.259	567.259	567.259	350.774	535.908	985.903	306.307	413.824	0.0066441	7.74316	0.276691	195.361	7.74316	323.646	350.774	0.122633	307.988	413.824
2013	521.714	7.69569	363.252	521.714	981.524		7.97836	8.10866	8.57348	566.468	566.468	566.468	363.252	521.714	982.354	310.483	438.09	0.00697266	7.69569	0.287196	208.532	7.69569	324.327	363.252	0.124651	321.087	438.09
2014	507.677	7.64822	375.729	507.677	976.897		8.01508	8.08308	8.71374	565.433	565.433	565.433	375.729	507.677	978.682	314.66	462.357	0.00731543	7.64822	0.296245	221.696	7.64822	324.993	375.729	0.126224	334.187	462.357
2015	486.503	7.60075	388.207	486.503	971.665		8.0518	8.0575	8.854	556.899	556.899	556.899	388.207	486.503	974.888	318.836	486.623	0.00768499	7.60075	0.303002	234.86	7.60075	325.642	388.207	0.127749	347.287	486.623
2016	494.032	7.71838	394.215	479.534	965.883		8.08852	8.03192	8.99426	561.117	561.117	561.117	395.68	495.869	970.975	323.012	510.89	0.00810121	7.55328	0.307834	248.034	7.74707	326.276	400.685	0.129433	360.387	510.89
2017	501.492	7.83492	400.167	472.965	959.552		8.12524	8.00634	9.13452	564.468	564.468	564.468	403.154	505.234	966.908	327.189	535.156	0.00861607	7.50581	0.310952	261.221	7.89339	326.894	413.162	0.131651	373.487	535.156
2018	508.882	7.95038	406.064	466.766	952.762		8.16196	7.98076	9.27478	567.088	567.088	567.088	410.627	514.6	962.712	331.365	559.423	0.00927565	7.45834	0.313635	274.426	8.03971	327.496	425.64	0.134059	386.586	559.423
2019	516.203	8.06476	411.906	460.903	945.637		8.19868	7.95518	9.41504	569.086	569.086	569.086	418.1	523.965	958.434	335.542	583.689	0.010067	7.41087	0.315707	287.653	8.18603	328.082	438.117	0.136336	399.686	583.689
2020	523.454	8.17805	417.692	455.355	938.204		8.2354	7.9296	9.5553	570.564	570.564	570.564	425.573	533.331	954.037	339.718	607.956	0.0109462	7.3634	0.316885	300.903	8.33235	328.653	450.595	0.138802	412.786	607.956
2021	527.476	8.24088	420.901	434.648	930.491		8.26904	8.01843	9.67767	571.603	571.603	571.603	430.467	539.464	949.495	341.689	622.313	0.011905	7.35756	0.317918	314.179	8.42817	329.208	452.946	0.141114	416.573	622.313
2022	531.452	8.303	424.074	414.207	922.502		8.30268	8.10726	9.80004	572.274	572.274	572.274	435.361	545.597	944.767	343.66	636.67	0.0129504	7.35172	0.318948	327.478	8.52399	329.749	455.297	0.143001	420.359	636.67
2023	535.382	8.3644	427.21	394.013	913.948		8.33632	8.19609	9.92241	572.643	572.643	572.643	440.255	551.73	939.837	345.63	651.028	0.0141809	7.34588	0.319722	340.484	8.6198	330.278	457.648	0.14503	424.146	651.028
2024	539.267	8.4251	430.311	374.045	904.607		8.36996	8.28492	10.0448	572.759	572.759	572.759	445.149	557.863	934.723	347.601	665.385	0.0155953	7.34004	0.320423	352.937	8.71562	330.801	460	0.147437	427.932	665.385
2025	543.107	8.48509	433.374	354.289	894.59		8.4036	8.37375	10.1671	572.67	572.67	572.67	450.043	563.996	929.44	349.572	679.742	0.017084	7.3342	0.320677	364.925	8.81144	331.318	462.351	0.14989	431.719	679.742
2026	544.163	8.50159	434.217	334.726	883.989		8.43724	8.46258	10.2895	572.41	572.41	572.41	452.659	567.274	924.002	351.543	694.099	0.0186534	7.32836	0.320654	376.52	8.86266	331.829	464.702	0.152086	435.505	694.099
2027	545.195	8.5177	435.04	315.343	872.878		8.47088	8.55141	10.4119	572.015	572.015	572.015	455.275	570.553	918.428	353.514	708.457	0.0202831	7.32252	0.320544	387.77	8.91388	332.335	467.053	0.154397	439.292	708.457
2028	546.202	8.53344	435.844	296.127	861.314		8.50452	8.64024	10.5343	571.511	571.511	571.511	457.891	573.831	912.727	355.485	722.814	0.0219181	7.31668	0.319889	398.713	8.9651	332.834	469.404	0.156801	443.078	722.814
2029	547.185	8.5488	436.629	277.066	849.338		8.53816	8.72907	10.6566	570.922	570.922	570.922	460.507	577.109	906.898	357.456	737.171	0.023616	7.31084	0.318932	409.378	9.01632	333.327	471.755	0.158978	446.865	737.171
2030	548.144	8.56378	437.394	258.146	836.993		8.5718	8.8179	10.779	570.267	570.267	570.267	463.123	580.388	900.946	359.427	751.528	0.025396	7.305	0.318023	419.791	9.06753	333.815	474.107	0.161154	450.651	751.528
2031	537.181	8.39251	428.646	242.019	824.319		8.58349	8.90894	10.9039	562.982	562.982	562.982	461.834	578.773	894.879	361.108	761.522	0.027243	7.29221	0.317015	429.975	9.0423	334.297	478.767	0.163327	454.169	761.522
2032	526.218	8.22123	419.898	226	811.352		8.59518	8.99998	11.0288	549.917	549.917	549.917	460.546	577.158	888.704	362.79	771.515	0.0291993	7.27942	0.315905	439.95	9.01708	334.774	483.428	0.165498	457.686	771.515
2033	515.255	8.04996	411.15	210.081	798.165		8.60687	9.09102	11.1537	531.803	531.803	531.803	459.257	575.543	882.272	364.472	781.508	0.0312578	7.26663	0.314765	449.795	8.99185	335.244	488.088	0.167666	461.203	781.508
2034	504.292	7.87868	402.402	194.256	784.828		8.61856	9.18206	11.2786	509.285	509.285	509.285	457.968	573.928	875.339	366.154	791.502	0.0333651	7.25384	0.313494	459.58	8.96662	335.707	492.749	0.169808	464.721	791.502
2035	493.33	7.7074	393.654	178.515	771.379		8.63025	9.2731	11.4035	482.916	482.916	482.916	456.68	572.314	867.745	367.835	801.495	0.0354713	7.24105	0.312013	469.309	8.94139	336.163	497.409	0.171897	468.238	801.495
2036	482.367	7.53613	384.906	162.855	757.848		8.64194	9.36414	11.5285	453.186	453.186	453.186	453.04	567.752	859.371	369.517	811.488	0.0375777	7.22826	0.310339	478.983	8.87013	336.613	502.069	0.173934	471.755	811.488
2037	471.404	7.36485	376.159	147.269	744.262		8.65363	9.45518	11.6534	420.516	420.516	420.516	449.401	563.191	850.129	371.199	821.482	0.0396854	7.21547	0.308489	488.605	8.79887	337.055	506.73	0.175919	475.272	821.482
2038	460.441	7.19358	367.411	131.752	730.648		8.66532	9.54622	11.7783	385.276	385.276	385.276	445.761	558.63	839.963	372.88	831.475	0.0417954	7.20268	0.306465	498.176	8.72761	337.491	511.39	0.177853	478.79	831.475
2039	449.478	7.0223	358.663	116.301	717.02		8.67701	9.63726	11.9032	347.788	347.788	347.788	442.122	554.069	828.831	374.562	841.468	0.0439082	7.18989	0.304295	507.697	8.65635	337.92	516.051	0.179736	482.307	841.468
2040	438.515	6.85103	349.915	100.909	703.384		8.6887	9.7283	12.0281	308.332	308.332	308.332	438.482	549.508	816.7	376.244	851.462	0.0460244	7.1771	0.302016	517.162	8.58509	338.342	520.711	0.181567	485.824	851.462
2041	427.552	6.67975	341.167	94.99	689.748		8.67866	9.80918	12.1049	273.732	273.732	273.732	431.628	540.918	803.558	376.206	856.906	0.0481445	7.08404	0.299637	526.569	8.45089	338.758	517.107	0.183349	487.88	856.906
2042	416.589	6.50847	332.419	89.141	676.121		8.66862	9.89006	12.1817	243.372	243.372	243.372	424.774	532.329	789.407	376.168	862.349	0.0502687	6.99098	0.297169	535.916	8.3167	339.168	513.504	0.185082	489.935	862.349
2043	405.627	6.3372	323.671	83.353	662.698		8.65858	9.97094	12.2584	216.71	216.71	216.71	417.92	523.739	774.392	376.129	867.793	0.0523964	6.89792	0.294613	544.943	8.1825	339.562	509.9	0.186765	491.991	867.793
2044	394.664	6.16592	314.923	77.627	649.642		8.64854	10.0518	12.3352	193.28	193.28	193.28	411.066	515.149	758.752	376.091	873.237	0.0544775	6.80486	0.291876	553.395	8.0483	339.934	506.296	0.188414	494.046	873.237
2045	383.701	5.99465	306.176	71.956	636.92		8.6385	10.1327	12.412	172.674	172.674	172.674	404.211	506.56	742.691	376.053	878.681	0.0564699	6.7118	0.288887	561.302	7.9141	340.282	502.692	0.190042	496.101	878.681
2046	372.738	5.82337	297.428	66.335	624.526		8.62846	10.2136	12.4888	154.533	154.533	154.533	394.801	494.766	726.404	376.015	884.125	0.058388	6.61874	0.285682	568.703	7.72985	340.607	499.088	0.191649	498.157	884.125
2047	361.775	5.6521	288.68	60.763	612.449		8.61842	10.2945	12.5656	138.55	138.55	138.55	385.39	482.973	710.047	375.977	889.569	0.0602432	6.52568	0.28229	575.632	7.54559	340.91	495.484	0.193237	500.212	889.569
2048	350.812	5.48082	279.932	55.238	600.681		8.60838	10.3753	12.6423	124.455	124.455	124.455	375.979	471.179	693.75	375.939	895.012	0.0620432	6.43262	0.278734	582.116	7.36134	341.19	491.88	0.194804	502.268	895.012
2049	339.849	5.30954	271.184	49.753	589.214		8.59834	10.4562	12.7191	112.01	112.01	112.01	366.568	459.386	677.619	375.9	900.456	0.0637941	6.33956	0.275033	588.186	7.17709	341.447	488.276	0.196353	504.323	900.456
2050	328.886	5.13827	262.436	44.307	578.034		8.5883	10.5371	12.7959	101.009	101.009	101.009	357.158	447.592	661.729	375.862	905.9	0.0655004	6.2465	0.271201	593.86	6.99283	341.683	484.672	0.197882	506.379	905.9
2051	317.924	4.96699	253.688	42.06	567.121		8.58011	10.6195	12.8585	91.275	91.275	91.275	350.015	438.64	646.136	377.511	911.593	0.0671665	6.19366	0.267251	599.156	6.85298	341.896	491.238	0.199393	504.959	911.593
2052	306.961	4.79572	244.94	39.846	556.459		8.57192	10.7019	12.921	82.649	82.649	82.649	342.871	429.688	630.881	379.16	917.286	0.068796	6.14082	0.263195	604.088	6.71312	342.087	497.804	0.200884	503.54	917.286
2053	295.998	4.62444	236.193	37.664	546.098		8.56373	10.7843	12.9836	74.996	74.996	74.996	335.728	420.736	615.997	380.809	922.978	0.070392	6.08798	0.259046	608.993	6.57326	342.26	504.369	0.202358	502.121	922.978
2054	285.035	4.45317	227.445	35.513	536.081		8.55554	10.8667	13.0462	68.198	68.198	68.198	328.585	411.785	601.507	382.458	928.671	0.0719672	6.03514	0.254826	614.188	6.43341	342.421	510.935	0.20381	500.702	928.671
2055	274.072	4.28189	218.697	33.39	526.374		8.54735	10.9491	13.1088	62.147	62.147	62.147	321.442	402.833	587.411	384.106	934.364	0.0735328	5.9823	0.250558	619.63	6.29355	342.569	517.501	0.20524	499.282	934.364
2056	263.109	4.11062	209.949	31.295	516.95		8.53916	11.0315	13.1713	56.757	56.757	56.757	314.299	393.881	573.711	385.755	940.056	0.0750894	5.92946	0.246255	625.288	6.15369	342.704	524.067	0.206648	497.863	940.056
2057	252.146	3.93934	201.201	29.222	507.801		8.53097	11.1139	13.2339	51.943	51.943	51.943	307.156	384.929	560.422	387.404	945.749	0.0766373	5.87662	0.241925	631.148	6.01384	342.826	530.633	0.208034	496.444	945.749
2058	241.183	3.76806	192.453	27.176	498.916		8.52278	11.1963	13.2965	47.64	47.64	47.64	300.012	375.977	547.553	389.053	951.442	0.0781767	5.82378	0.237578	637.197	5.87398	342.936	537.198	0.209397	495.025	951.442
2059	230.22	3.59679	183.705	25.149	490.289		8.51459	11.2787	13.359	43.786	43.786	43.786	292.869	367.025	535.108	390.702	957.134	0.0797082	5.77094	0.233221	643.423	5.73412	343.033	543.764	0.210739	493.605	957.134
2060	219.258	3.42551	174.957	23.144	481.909		8.5064	11.3611	13.4216	40.328	40.328	40.328	285.726	358.074	523.088	392.351	962.827	0.0812315	5.7181	0.22886	649.816	5.59427	343.118	550.33	0.21206	492.186	962.827
2061	208.295	3.25424	166.21	22.109	473.766		8.49168	11.4281	13.4735	37.216	37.216	37.216	278.583	349.122	511.485	393.875	968.821	0.0827459	5.7204	0.224497	656.364	5.45441	343.192	557.156	0.213359	494.165	968.821
2062	197.332	3.08296	157.462	21.096	465.842		8.47696	11.4951	13.5253	34.417	34.417	34.417	271.44	340.17	500.285	395.398	974.815	0.084251	5.7227	0.220133	663.052	5.31455	343.253	563.982	0.214637	496.145	974.815
2063	186.369	2.91169	148.714	20.097	458.141		8.46224	11.5621	13.5772	31.888	31.888	31.888	264.297	331.218	489.474	396.922	980.809	0.0857466	5.725	0.215772	669.878	5.1747	343.308	570.808	0.215894	498.124	980.809
2064	175.406	2.74041	139.966	19.116	450.666		8.44752	11.6291	13.629	29.603	29.603	29.603	257.154	322.266	479.036	398.446	986.803	0.0871908	5.7273	0.211477	676.839	5.03484	343.363	577.634	0.217105	500.103	986.803
2065	164.443	2.56913	131.218	18.151	443.405		8.4328	11.6961	13.6809	27.533	27.533	27.533	250.01	313.314	468.958	399.97	992.797	0.0885431	5.7296	0.207299	683.927	4.89498	343.417	584.46	0.218245	502.083	992.797
2066	153.48	2.39786	122.47	17.199	436.334		8.41808	11.7632	13.7328	25.65	25.65	25.65	242.867	304.363	459.216	401.494	998.791	0.0898084	5.7319	0.203228	691.121	4.75513	343.472	591.286	0.219313	504.062	998.791
2067	142.517	2.22658	113.722	16.261	429.437		8.40336	11.8302	13.7846	23.939	23.939	23.939	235.724	295.411	449.79	403.018	1004.79	0.0909926	5.7342	0.199262	698.407	4.61527	343.526	598.112	0.220311	506.041	1004.79
2068	131.555	2.05531	104.974	15.338	422.712		8.38864	11.8972	13.8365	22.38	22.38	22.38	228.581	286.459	440.673	404.542	1010.78	0.0921011	5.7365	0.195398	705.786	4.47541	343.581	604.939	0.221238	508.021	1010.78
2069	120.592	1.88403	96.2266	14.425	416.154		8.37392	11.9642	13.8883	20.953	20.953	20.953	221.438	277.507	431.86	406.066	1016.77	0.0931386	5.7388	0.191632	713.258	4.33556	343.635	611.765	0.222095	510	1016.77
2070	109.629	1.71276	87.4787	13.524	409.76		8.3592	12.0312	13.9402	19.648	19.648	19.648	214.295	268.555	423.343	407.59	1022.77	0.0941097	5.7411	0.187963	720.824	4.1957	343.689	618.591	0.222883	511.98	1022.77
2071	98.6659	1.54148	78.7309	12.972	403.527		8.33796	12.0643	14.002	18.45	18.45	18.45	207.151	259.603	415.114	407.86	1027.76	0.0950177	5.72833	0.184385	728.484	4.05584	343.744	620.479	0.223602	516.938	1027.76
2072	87.703	1.37021	69.983	12.429	397.448		8.31672	12.0975	14.0639	17.348	17.348	17.348	200.008	250.651	407.161	408.13	1032.75	0.095865	5.71556	0.180893	736.234	3.91599	343.798	622.368	0.224254	521.896	1032.75
2073	76.7402	1.19893	61.2351	11.896	391.518		8.29548	12.1306	14.1257	16.331	16.331	16.331	192.865	241.7	399.469	408.4	1037.74	0.096654	5.70279	0.177481	743.918	3.77613	343.851	624.257	0.224838	526.854	1037.74
2074	65.7773	1.02765	52.4872	11.372	385.735		8.27424	12.1637	14.1876	15.395	15.395	15.395	185.722	232.748	392.024	408.67	1042.73	0.097439	5.69002	0.174165	751.393	3.63627	343.901	626.146	0.225369	531.812	1042.73
2075	54.8144	0.856378	43.7394	10.859	380.089		8.253	12.1968	14.2494	14.529	14.529	14.529	178.579	223.796	384.814	408.941	1047.72	0.09827	5.67725	0.17096	758.674	3.49642	343.947	628.035	0.22586	536.77	1047.72
2076	43.8515	0.685103	34.9915	10.353	374.575		8.23176	12.23	14.3112	13.725	13.725	13.725	171.436	214.844	377.826	409.211	1052.71	0.0991408	5.66448	0.167854	765.774	3.35656	343.991	629.923	0.226311	541.728	1052.71
2077	32.8886	0.513827	26.2436	9.855	369.177		8.21052	12.2631	14.3731	12.98	12.98	12.98	164.293	205.892	371.043	409.481	1057.7	0.100046	5.65171	0.164838	772.692	3.2167	344.031	631.812	0.226723	546.687	1057.7
2078	21.9258	0.342551	17.4957	9.365	363.884		8.18928	12.2962	14.4349	12.287	12.287	12.287	157.149	196.94	364.449	409.751	1062.69	0.100984	5.63894	0.16191	779.433	3.07685	344.068	633.701	0.227096	551.645	1062.69
2079	10.9629	0.171276	8.74787	8.883	358.698		8.16804	12.3294	14.4968	11.64	11.64	11.64	150.006	187.989	358.041	410.022	1067.68	0.101952	5.62617	0.159068	786.014	2.93699	344.102	635.59	0.227432	556.603	1067.68
2080	0	0	0	8.407	353.618		8.1468	12.3625	14.5586	11.039	11.039	11.039	142.863	179.037	351.817	410.292	1072.67	0.102948	5.6134	0.156307	792.452	2.79713	344.133	637.478	0.22773	561.561	1072.67
2081	0	0	0	8.079	348.643		8.14506	12.3622	14.632	10.473	10.473	10.473	135.72	170.085	345.772	409.19	1076.53	0.103971	5.59813	0.153625	798.762	2.65728	344.161	634.811	0.22799	567.222	1076.53
2082	0	0	0	7.762	343.775		8.14332	12.3619	14.7054	9.947	9.947	9.947	128.577	161.133	339.903	408.089	1080.4	0.105018	5.58286	0.151019	804.957	2.51742	344.186	632.143	0.228213	572.882	1080.4
2083	0	0	0	7.448	339.011		8.14158	12.3617	14.7788	9.452	9.452	9.452	121.434	152.181	334.204	406.988	1084.27	0.106088	5.56759	0.148484	810.899	2.37756	344.208	629.475	0.2284	578.543	1084.27
2084	0	0	0	7.139	334.347		8.13984	12.3614	14.8522	8.988	8.988	8.988	114.29	143.229	328.663	405.886	1088.13	0.10718	5.55232	0.146019	816.454	2.23771	344.227	626.807	0.228568	584.204	1088.13
2085	0	0	0	6.838	329.777		8.1381	12.3611	14.9256	8.552	8.552	8.552	107.147	134.278	323.271	404.785	1092	0.108294	5.53705	0.143627	821.646	2.09785	344.242	624.139	0.228736	589.864	1092
2086	0	0	0	6.542	325.298		8.13636	12.3608	14.9991	8.143	8.143	8.143	100.004	125.326	318.022	403.684	1095.87	0.109428	5.52178	0.141304	826.495	1.95799	344.253	621.472	0.228902	595.525	1095.87
2087	0	0	0	6.25	320.905		8.13462	12.3605	15.0725	7.755	7.755	7.755	92.861	116.374	312.909	402.582	1099.73	0.110579	5.50651	0.139041	831.022	1.81814	344.261	618.804	0.229068	601.186	1099.73
2088	0	0	0	5.962	316.589		8.13288	12.3603	15.1459	7.39	7.39	7.39	85.7178	107.422	307.917	401.481	1103.6	0.111745	5.49124	0.136834	835.231	1.67828	344.266	616.136	0.229234	606.846	1103.6
2089	0	0	0	5.68	312.342		8.13114	12.36	15.2193	7.046	7.046	7.046	78.5747	98.4702	303.036	400.38	1107.47	0.112926	5.47597	0.134682	839.131	1.53842	344.268	613.468	0.2294	612.507	1107.47
2090	0	0	0	5.403	308.166		8.1294	12.3597	15.2927	6.721	6.721	6.721	71.4315	89.5184	298.267	399.278	1111.33	0.114121	5.4607	0.132583	842.747	1.39857	344.266	610.8	0.229566	618.167	1111.33
2091	0	0	0	5.201	304.063		8.12762	12.3507	15.341	6.414	6.414	6.414	64.2884	80.5665	293.609	397.401	1116.6	0.115332	5.44286	0.130537	846.101	1.25871	344.261	605.13	0.229732	623.637	1116.6
2092	0	0	0	5.002	300.034		8.12584	12.3418	15.3893	6.122	6.122	6.122	57.1452	71.6147	289.059	395.524	1121.86	0.116557	5.42502	0.128543	849.213	1.11885	344.253	599.46	0.229898	629.108	1121.86
2093	0	0	0	4.808	296.081		8.12406	12.3328	15.4376	5.846	5.846	5.846	50.0021	62.6629	284.617	393.647	1127.12	0.117797	5.40718	0.126597	852.013	0.978997	344.241	593.79	0.230064	634.578	1127.12
2094	0	0	0	4.616	292.203		8.12228	12.3238	15.4859	5.584	5.584	5.584	42.8589	53.711	280.279	391.769	1132.38	0.119027	5.38934	0.1247	854.427	0.83914	344.225	588.119	0.230225	640.048	1132.38
2095	0	0	0	4.429	288.395		8.1205	12.3148	15.5342	5.334	5.334	5.334	35.7158	44.7592	276.038	389.892	1137.65	0.120223	5.3715	0.122849	856.475	0.699283	344.206	582.449	0.230376	645.518	1137.65
2096	0	0	0	4.245	284.655		8.11872	12.3059	15.5824	5.099	5.099	5.099	28.5726	35.8074	271.891	388.015	1142.91	0.121388	5.35366	0.121043	858.173	0.559427	344.184	576.779	0.230518	650.988	1142.91
2097	0	0	0	4.063	280.979		8.11694	12.2969	15.6307	4.874	4.874	4.874	21.4295	26.8555	267.832	386.138	1148.17	0.122524	5.33582	0.119278	859.539	0.41957	344.157	571.109	0.230651	656.458	1148.17
2098	0	0	0	3.888	277.366		8.11516	12.2879	15.679	4.663	4.663	4.663	14.2863	17.9037	263.859	384.261	1153.44	0.123631	5.31798	0.117551	860.589	0.279713	344.127	565.438	0.230773	661.928	1153.44
2099	0	0	0	3.713	273.807		8.11338	12.279	15.7273	4.46	4.46	4.46	7.14315	8.95184	259.961	382.384	1158.7	0.124709	5.30014	0.115857	861.325	0.139857	344.094	559.768	0.230887	667.398	1158.7
2100	0	0	0	3.541	270.298		8.1116	12.27	15.7756	4.266	4.266	4.266	0	0	256.133	380.506	1163.96	0.125762	5.2823	0.114197	861.753	0	344.057	554.098	0.230991	672.868	1163.96
Source: Meinshausen, M., S. J. Smith, K. V. Calvin, J. S. Daniel, M. L. T. Kainuma, J.-F. Lamarque, K. Matsumoto, S. A. Montzka, S. C. B. Raper, K. Riahi, A. M. Thomson, G. J. M. Velders and D. van Vuuren (2011). "The RCP Greenhouse Gas Concentrations and their Extension from 1765 to 2300." Climatic Change (Special Issue), DOI: 10.1007/s10584-011-0156-z, freely available online here http://www.sp…
JR Base: History rcp3 from above, future shape from 2052
JR 2x experiment, see text

## Sheet: temp
NOAA	http://www.ncdc.noaa.gov/cag/time-series/global				MAGICC	MAGICC-VERSION: 6.8.01 BETA, 7th July 2012 - live.magicc.org
GISS	http://data.giss.nasa.gov/gistemp/				RCP	Meinshausen, M., S. J. Smith, K. V. Calvin, J. S. Daniel, M. L. T. Kainuma, J.-F. Lamarque, K. Matsumoto, S. A. Montzka, S. C. B. Raper, K. Riahi, A. M. Thomson, G. J. M. Velders and D. van Vuuren (2011). "The RCP Greenhouse Gas Concentrations and their Extension from 1765 to 2300." Climatic Change (Special Issue), DOI: 10.1007/s10584-011-0156-z, freely available online here http://www.springerli…
	http://www.ncdc.noaa.gov/cag/time-series/global	anomalie	NOAA	MAGICC driven by RCP 35PD	MAGICC driven by RCP 45	MAGICC driven by RCP 6	anomalie	anomalie	anomalie	GISS anomalie	NOAA anomalie	GISS
1850	0
1851	-0.000337572
1852	-0.000521102
1853	0.0014772
1854	0.00287224
1855	0.004512
1856	-0.0176863
1857	-0.139701
1858	-0.186897
1859	-0.121781
1860	-0.0759738
1861	-0.0483139
1862	-0.040854
1863	-0.0574784
1864	-0.0460966
1865	-0.031165
1866	-0.0208472
1867	-0.0129568
1868	-0.00104382
1869	0.0126002
1870	0.0215403
1871	0.0247621
1872	0.020284
1873	0.0120236
1874	0.00401912
1875	0.00339569
1876	-0.00156683
1877	-0.015633
1878	-0.0116122
1879	-0.00329862
1880	0.00509577		13.63							-0.0399474	5.26151e-05	13.59
1881	0.0149596		13.68							0.0600526	0.0500526	13.69
1882	0.0248174		13.68							0.0700526	0.0500526	13.7
1883	-0.00150202		13.6							-0.0399474	-0.0299474	13.59
1884	-0.258435		13.54							-0.109947	-0.0899474	13.52
1885	-0.40397		13.53							-0.149947	-0.0999474	13.48
1886	-0.288029		13.54							-0.139947	-0.0899474	13.49
1887	-0.271222		13.49							-0.169947	-0.139947	13.46
1888	-0.219085		13.59							-0.0399474	-0.0399474	13.59
1889	-0.211566		13.64							0.0500526	0.0100526	13.68
1890	-0.194992		13.42							-0.209947	-0.209947	13.42
1891	-0.227498		13.5							-0.0799474	-0.129947	13.55
1892	-0.188068		13.44							-0.0999474	-0.189947	13.53
1893	-0.156926		13.43							-0.129947	-0.199947	13.5
1894	-0.104522		13.47							-0.139947	-0.159947	13.49
1895	-0.0718953		13.52							-0.0499474	-0.109947	13.58
1896	-0.0553327		13.66							0.0200526	0.0300526	13.65
1897	-0.0824189		13.63							0.0500526	5.26151e-05	13.68
1898	-0.0838459		13.49							-0.119947	-0.139947	13.51
1899	-0.0681437		13.63							0.0100526	5.26151e-05	13.64
1900	-0.0505585		13.68							0.0800526	0.0500526	13.71
1901	-0.0389915		13.61							0.0300526	-0.0199474	13.66
1902	-0.0304739		13.5							-0.0999474	-0.129947	13.53
1903	-0.148948		13.41							-0.189947	-0.219947	13.44
1904	-0.221323		13.33							-0.269947	-0.299947	13.36
1905	-0.153237		13.46							-0.109947	-0.169947	13.52
1906	-0.102486		13.54							-0.0599474	-0.0899474	13.57
1907	-0.0771193		13.38							-0.229947	-0.249947	13.4
1908	-0.0795189		13.31							-0.259947	-0.319947	13.37
1909	-0.0624208		13.32							-0.309947	-0.309947	13.32
1910	-0.0403785		13.37							-0.259947	-0.259947	13.37
1911	-0.0273832		13.31							-0.279947	-0.319947	13.35
1912	-0.0114779		13.42							-0.179947	-0.209947	13.45
1913	-0.106469		13.43							-0.169947	-0.199947	13.46
1914	-0.0776086		13.61							0.0100526	-0.0199474	13.64
1915	-0.0291297		13.68							0.0600526	0.0500526	13.69
1916	0.0064047		13.45							-0.169947	-0.179947	13.46
1917	0.0302796		13.43							-0.229947	-0.199947	13.4
1918	0.0461468		13.54							-0.0799474	-0.0899474	13.55
1919	0.057402		13.55							-0.0499474	-0.0799474	13.58
1920	0.0618567		13.54							-0.0899474	-0.0899474	13.54
1921	0.0373089		13.6							-0.0399474	-0.0299474	13.59
1922	0.0510109		13.52							-0.0999474	-0.109947	13.53
1923	0.0624189		13.53							-0.0599474	-0.0999474	13.57
1924	0.0754415		13.5							-0.0999474	-0.129947	13.53
1925	0.0854928		13.6							-0.0299474	-0.0299474	13.6
1926	0.0991826		13.69							0.0800526	0.0600526	13.71
1927	0.105947		13.6							-0.0299474	-0.0299474	13.6
1928	0.115925		13.57							-0.0399474	-0.0599474	13.59
1929	0.107705		13.45							-0.189947	-0.179947	13.44
1930	0.100881		13.65							0.0300526	0.0200526	13.66
1931	0.110682		13.67							0.0800526	0.0400526	13.71
1932	0.117792		13.63							5.26151e-05	5.26151e-05	13.63
1933	0.110142		13.5							-0.109947	-0.129947	13.52
1934	0.126874		13.65							0.0300526	0.0200526	13.66
1935	0.142819		13.61							-0.0199474	-0.0199474	13.61
1936	0.158126		13.64							0.0200526	0.0100526	13.65
1937	0.168681		13.73							0.150053	0.100053	13.78
1938	0.179215		13.72							0.140053	0.0900526	13.77
1939	0.180717		13.74							0.140053	0.110053	13.77
1940	0.188253		13.85							0.250053	0.220053	13.88
1941	0.190558		13.95							0.300053	0.320053	13.93
1942	0.190765		13.9							0.270053	0.270053	13.9
1943	0.17692		13.91							0.310053	0.280053	13.94
1944	0.183948		14.04							0.420053	0.410053	14.05
1945	0.194408		13.92							0.290053	0.290053	13.92
1946	0.203598		13.75							0.140053	0.120053	13.77
1947	0.212944		13.7							0.130053	0.0700526	13.76
1948	0.213315		13.7							0.0800526	0.0700526	13.71
1949	0.218118		13.69							0.0800526	0.0600526	13.71
1950	0.207657		13.59							-0.00994738	-0.0399474	13.62
1951	0.199632		13.74							0.100053	0.110053	13.73
1952	0.187755		13.77							0.180053	0.140053	13.81
1953	0.181093		13.84							0.250053	0.210053	13.88
1954	0.173845		13.63							0.0500526	5.26151e-05	13.68
1955	0.184039		13.61							0.0300526	-0.0199474	13.66
1956	0.200485		13.55							-0.0299474	-0.0799474	13.6
1957	0.216615		13.8							0.200053	0.170053	13.83
1958	0.225489		13.86							0.230053	0.230053	13.86
1959	0.232326		13.81							0.200053	0.180053	13.83
1960	0.23473		13.77							0.140053	0.140053	13.77
1961	0.20753		13.83							0.220053	0.200053	13.85
1962	0.184763		13.84							0.190053	0.210053	13.82
1963	0.170368		13.86							0.230053	0.230053	13.86
1964	0.033584		13.6							-0.0299474	-0.0299474	13.6
1965	-0.0226503		13.67							0.0700526	0.0400526	13.7
1966	0.0213019		13.73							0.120053	0.100053	13.75
1967	0.0813493		13.74							0.150053	0.110053	13.78
1968	0.113005		13.72							0.100053	0.0900526	13.73
1969	0.0714068		13.84							0.230053	0.210053	13.86
1970	0.0957302		13.79							0.200053	0.160053	13.83
1971	0.153032		13.67							0.0800526	0.0400526	13.71
1972	0.199322		13.78							0.180053	0.150053	13.81
1973	0.223901		13.91							0.320053	0.280053	13.95
1974	0.228427		13.68							0.100053	0.0500526	13.73
1975	0.214765		13.75							0.160053	0.120053	13.79
1976	0.194673		13.67							0.0600526	0.0400526	13.69
1977	0.247339		13.95							0.360053	0.320053	13.99
1978	0.302902		13.86							0.240053	0.230053	13.87
1979	0.322552		13.98							0.340053	0.350053	13.97
1980	0.35776		14.02							0.450053	0.390053	14.08
1981	0.381163		14.05							0.500053	0.420053	14.13
1982	0.391838		13.94							0.300053	0.310053	13.93
1983	0.152422		14.1							0.480053	0.470053	14.11
1984	0.161803		13.9							0.330053	0.270053	13.96
1985	0.257382		13.89							0.290053	0.260053	13.92
1986	0.315258		13.98							0.360053	0.350053	13.99
1987	0.355086		14.12							0.510053	0.490053	14.14
1988	0.406018		14.13							0.570053	0.500053	14.2
1989	0.45344		14.05							0.460053	0.420053	14.09
1990	0.489934		14.19							0.610053	0.560053	14.24
1991	0.511445		14.16							0.590053	0.530053	14.22
1992	0.222956		14.01							0.400053	0.380053	14.03
1993	0.17801		14.04							0.410053	0.410053	14.04
1994	0.300181		14.09							0.490053	0.460053	14.12
1995	0.392748		14.21							0.630053	0.580053	14.26
1996	0.456867		14.08							0.520053	0.450053	14.15
1997	0.505289		14.27							0.650053	0.640053	14.28
1998	0.55393		14.39							0.800053	0.760053	14.43
1999	0.60349		14.19							0.590053	0.560053	14.22
2000	0.643092		14.18							0.590053	0.550053	14.22
2001	0.676547		14.3							0.720053	0.670053	14.35
2002	0.702882		14.35							0.800053	0.720053	14.43
2003	0.721737		14.37							0.790053	0.740053	14.42
2004	0.737843		14.33							0.710053	0.700053	14.34
2005	0.755392		14.41							0.860053	0.780053	14.49
2006	0.775515		14.37							0.800053	0.740053	14.43
2007	0.797		14.37							0.830053	0.740053	14.46
2008	0.820432		14.29							0.710053	0.660053	14.34
2009	0.858037		14.39							0.820053	0.760053	14.45
2010	0.88928		14.45							0.880053	0.820053	14.51
2011	0.916879		14.33							0.770053	0.700053	14.4
2012	0.944145		14.37							0.800053	0.740053	14.43
2013	0.971393		14.42							0.820053	0.790053	14.45
2014	0.998803		14.49							0.910053	0.860053	14.54
2015	1.02651		14.65							0.97291	1.02005	14.6029
2016		1.03865		14.6806	14.6427	14.6686	1.03865	1.01274	1.05063
2017		1.06511		14.7077	14.6661	14.6951	1.06511	1.03617	1.07771
2018		1.09164		14.7343	14.6893	14.7216	1.09164	1.05938	1.10437
2019		1.11839		14.7607	14.7125	14.7483	1.11839	1.08254	1.13077
2020		1.14498		14.7863	14.7357	14.7749	1.14498	1.10575	1.15634
2021		1.17126		14.8109	14.7591	14.8012	1.17126	1.12918	1.18092
2022		1.19753		14.8346	14.7827	14.8275	1.19753	1.15274	1.20461
2023		1.22379		14.8575	14.8063	14.8537	1.22379	1.17639	1.22759
2024		1.25004		14.8799	14.8301	14.88	1.25004	1.20014	1.24997
2025		1.2763		14.9018	14.8539	14.9062	1.2763	1.22398	1.27181
2026		1.30256		14.9231	14.8779	14.9325	1.30256	1.24791	1.29314
2027		1.32884		14.9439	14.9019	14.9588	1.32884	1.27194	1.31397
2028		1.35514		14.9643	14.926	14.9851	1.35514	1.29606	1.33433
2029		1.38147		14.9842	14.9502	15.0114	1.38147	1.32027	1.35422
2030		1.40793		15.0032	14.9734	15.0379	1.40793	1.34349	1.37322
2031		1.43459		15.021	14.995	15.0645	1.43459	1.36508	1.39105
2032		1.46121		15.0382	15.016	15.0912	1.46121	1.38603	1.40823
2033		1.48772		15.0547	15.0366	15.1177	1.48772	1.4067	1.42479
2034		1.51413		15.0707	15.0572	15.1441	1.51413	1.42722	1.44072
2035		1.54041		15.0859	15.0776	15.1704	1.54041	1.44764	1.456
2036		1.56655		15.1006	15.098	15.1965	1.56655	1.46802	1.47064
2037		1.59252		15.1146	15.1183	15.2225	1.59252	1.48836	1.48463
2038		1.61833		15.1279	15.1386	15.2483	1.61833	1.5087	1.49798
2039		1.64397		15.1406	15.159	15.2739	1.64397	1.52904	1.51068
2040		1.66953		15.1523	15.18	15.2995	1.66953	1.55005	1.52231
2041		1.69509		15.1626	15.2021	15.325	1.69509	1.57213	1.53261
2042		1.7204		15.1718	15.2246	15.3504	1.7204	1.59466	1.5419
2043		1.74545		15.1803	15.2474	15.3754	1.74545	1.61749	1.55034
2044		1.77026		15.188	15.2705	15.4002	1.77026	1.64059	1.55803
2045		1.79483		15.195	15.2939	15.4248	1.79483	1.66395	1.56501
2046		1.81919		15.2013	15.3175	15.4491	1.81919	1.68754	1.57134
2047		1.84334		15.207	15.3413	15.4733	1.84334	1.71136	1.57705
2048		1.86729		15.2121	15.3654	15.4972	1.86729	1.73542	1.58217
2049		1.89106		15.2167	15.3896	15.521	1.89106	1.7597	1.58674
2050		1.91427		15.2205	15.4137	15.5442	1.91427	1.78375	1.59051
2051		1.93672		15.2233	15.4373	15.5667	1.93672	1.80732	1.59334
2052		1.95859		15.2254	15.4607	15.5885	1.95859	1.83078	1.59546
2053		1.97994		15.227	15.4843	15.6099	1.97994	1.8543	1.59706
2054		2.00082		15.2282	15.5079	15.6308	2.00082	1.87795	1.59823
2055		2.02125		15.229	15.5317	15.6512	2.02125	1.90176	1.59901
2056		2.04125		15.2294	15.5557	15.6712	2.04125	1.92576	1.59943
2057		2.06083		15.2295	15.5799	15.6908	2.06083	1.94995	1.59952
2058		2.08		15.2292	15.6043	15.7099	2.08	1.97436	1.59929
2059		2.09878		15.2287	15.6289	15.7287	2.09878	1.99898	1.59876
2060		2.11708		15.2282	15.655	15.747	2.11708	2.02505	1.59822
2061		2.13487		15.2278	15.6832	15.7648	2.13487	2.05326	1.59784
2062		2.15217		15.2273	15.7125	15.7821	2.15217	2.08257	1.5974
2063		2.16898		15.2268	15.7426	15.7989	2.16898	2.11261	1.59687
2064		2.18533		15.2262	15.7732	15.8153	2.18533	2.14325	1.59628
2065		2.20121		15.2256	15.8044	15.8312	2.20121	2.17441	1.59561
2066		2.21663		15.2248	15.836	15.8466	2.21663	2.20606	1.59487
2067		2.2316		15.224	15.8681	15.8616	2.2316	2.23814	1.59404
2068		2.24613		15.2231	15.9006	15.8761	2.24613	2.27064	1.59313
2069		2.26022		15.2221	15.9335	15.8902	2.26022	2.30354	1.59211
2070		2.27377		15.2211	15.9662	15.9037	2.27377	2.33623	1.59115
2071		2.28675		15.2202	15.9983	15.9167	2.28675	2.36835	1.5903
2072		2.29918		15.2195	16.0302	15.9291	2.29918	2.40025	1.58953
2073		2.31107		15.2188	16.062	15.941	2.31107	2.43203	1.58881
2074		2.32242		15.2181	16.0937	15.9524	2.32242	2.46374	1.58813
2075		2.33323		15.2174	16.1253	15.9632	2.33323	2.49538	1.58748
2076		2.34352		15.2168	16.1569	15.9735	2.34352	2.52698	1.58686
2077		2.35328		15.2162	16.1885	15.9832	2.35328	2.55854	1.58625
2078		2.36255		15.2156	16.22	15.9925	2.36255	2.59006	1.58566
2079		2.37134		15.215	16.2515	16.0013	2.37134	2.62156	1.58508
2080		2.37922		15.2143	16.2823	16.0092	2.37922	2.65239	1.58439
2081		2.38592		15.2135	16.3121	16.0159	2.38592	2.68218	1.58351
2082		2.39218		15.2126	16.3411	16.0221	2.39218	2.71112	1.58261
2083		2.39823		15.2116	16.3692	16.0282	2.39823	2.73921	1.58169
2084		2.40414		15.2107	16.3963	16.0341	2.40414	2.76639	1.58074
2085		2.40997		15.2097	16.4226	16.0399	2.40997	2.79266	1.57976
2086		2.41574		15.2087	16.448	16.0457	2.41574	2.81802	1.57874
2087		2.42149		15.2076	16.4724	16.0514	2.42149	2.84247	1.5777
2088		2.42723		15.2066	16.496	16.0572	2.42723	2.86603	1.57662
2089		2.43298		15.2055	16.5186	16.0629	2.43298	2.8887	1.57551
2090		2.43874		15.2043	16.5405	16.0687	2.43874	2.91054	1.57436
2091		2.44454		15.2031	16.5615	16.0745	2.44454	2.93159	1.5732
2092		2.45035		15.202	16.582	16.0803	2.45035	2.95208	1.57201
2093		2.45619		15.2008	16.6021	16.0861	2.45619	2.97217	1.57081
2094		2.46206		15.1996	16.6219	16.092	2.46206	2.99194	1.56962
2095		2.46796		15.1984	16.6414	16.0979	2.46796	3.01143	1.56843
2096		2.47389		15.1972	16.6606	16.1038	2.47389	3.03069	1.56725
2097		2.47985		15.196	16.6797	16.1098	2.47985	3.04974	1.56608
2098		2.48584		15.1949	16.6986	16.1158	2.48584	3.06864	1.56491
2099		2.49186		15.1937	16.7174	16.1218	2.49186	3.08741	1.56376
2100		2.49711		15.1933	16.7325	16.1271	2.49711	3.10254	1.56331
							14.6846
							14.7131
							14.7421
							14.7717
							14.8021
							14.8334
							14.8651
							14.8973
							14.9299
							14.9629
							14.9963
							15.03
							15.0641
							15.0986
							15.134
							15.1706
							15.2078
							15.2458
							15.2844
							15.3237
							15.3635
							15.4039
							15.4449
							15.4864
							15.5282
							15.5704
							15.6129
							15.6559
							15.6994
							15.7434
							15.7879
							15.8328
							15.8783
							15.9242
							15.9702
							16.016
							16.062
							16.1081
							16.1545
							16.2011
							16.248
							16.2951
							16.3425
							16.3901
							16.4378
							16.4856
							16.5335
							16.5814
							16.6292
							16.6771
							16.7249
							16.7727
							16.8204
							16.8681
							16.9158
							16.9633
							17.0106
							17.0579
							17.1051
							17.1521
							17.1991
							17.246
							17.2927
							17.3394
							17.3864
							17.4339
							17.4815
							17.5293
							17.577
							17.6248
							17.6726
							17.7204
							17.7681
							17.8158
							17.8632
							17.9099
							17.9562
							18.0022
							18.0479
							18.0933
							18.1384
							18.1832
							18.2277
							18.2719
							18.306
