# Supplementary material for: A user-friendly earth system model of low complexity: the ESCIMO system dynamics model of global warming towards 2100
Source: Copernicus journal article supplement (doi:10.5194/esd-7-831-2016), 2016-11-02
Supplement: Supplementary file [file esd-7-831-2016-supplement-title-page.pdf › esd-7-831-2016-supplement-title-page.pdf]

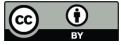

## *Supplement of*

# **A user-friendly earth system model of low complexity: the ESCIMO system dynamics model of global warming towards 2100**

**Jorgen Randers et al.**

*Correspondence to:* Jorgen Randers ([jorgen.randers@bi.no](mailto:jorgen.randers@bi.no))

- [esd-7-831-2016-supplement-title-page.pdf](#)
- ESCIMO model and documentation 160926
  - ESCIMO documentation 160911.zip
  - ESCIMO model 160911.zip

The copyright of individual parts of the supplement might differ from the CC-BY 3.0 licence.
